# Supplementary material for: Quantum mechanics study and Monte Carlo simulation on the hydrolytic deamination of 5-methylcytosine glycol
Source: Royal Society of Chemistry journal article supplement (doi:10.1039/c0cp02783a), 2011-01-01
Supplement: c0cp02783a.pdf [file c0cp02783a.pdf]

## Supporting Information

# Quantum Mechanics Study and Monte Carlo Simulation on the Hydrolytic Deamination of 5-Methylcytosine Glycol

Ze Qin Chen<sup>1,2</sup>, Cheng Hua Zhang<sup>1</sup>, Chan Kyung Kim<sup>3</sup>, Ying Xue<sup>1,\*</sup>

<sup>1</sup>*College of Chemistry,  
Key Laboratory of Green Chemistry and Technology in Ministry of Education,  
Sichuan University, Chengdu 610064,  
People's Republic of China,*

<sup>2</sup>*Lab of Applied Chemistry and Pollution Control Technology,  
College of Chemistry and Chemical Engineering,  
China West Normal University, Nanchong 637002,  
People's Republic of China*

<sup>3</sup>*Department of Chemistry, Inha University,  
Incheon 402-751, Korea*

## CONTENT

|                                                      |               |
|------------------------------------------------------|---------------|
| Figure S1.....                                       | 1             |
| Figure S2.....                                       | 2             |
| Figure S3.....                                       | 3             |
| <b><i>I. Gas Structures of Cis-(5S,6S)-mCg</i></b>   |               |
| <b>I.1 At the B3lyp/6-311g(d,p) Level</b>            |               |
| <b>Direct Deaminaiton Mechanism</b>                  |               |
| Path A.....                                          | 4-10          |
| Path B.....                                          | 11-15         |
| Path C.....                                          | 16-19         |
| <b>Water-Mediated Deamination Mechanism</b>          |               |
| Path A.....                                          | 19-27         |
| Path B.....                                          | 28-32         |
| Path C.....                                          | 33-36         |
| <b>I.2 At the Mp2/6-311g(d,p) Level</b>              |               |
| <b>Direct Deaminaiton Mechanism</b>                  |               |
| Path A.....                                          | 37-44         |
| Path B.....                                          | 45-48         |
| Path C.....                                          | 49-52         |
| <b>Water-Mediated Deamination Mechanism</b>          |               |
| Path A.....                                          | 53-60         |
| Path B.....                                          | 61-65         |
| Path C.....                                          | 66-69         |
| <b><i>II. Gas Structures of Cis-(5R,6R)-mCg</i></b>  |               |
| <b>II.1 At the B3lyp/6-311g(d,p) Level.....</b>      | <b>70-78</b>  |
| <b>II.2 At the Mp2/6-311g(d,p) Level.....</b>        | <b>78-86</b>  |
| <b><i>III. Gas Structures of Cis-(5S,6S)-mCg</i></b> |               |
| <b>III.1 At the B3lyp/6-311g(d,p) Level.....</b>     | <b>86-94</b>  |
| <b>III.2 At the Mp2/6-311g(d,p) Level.....</b>       | <b>94-102</b> |

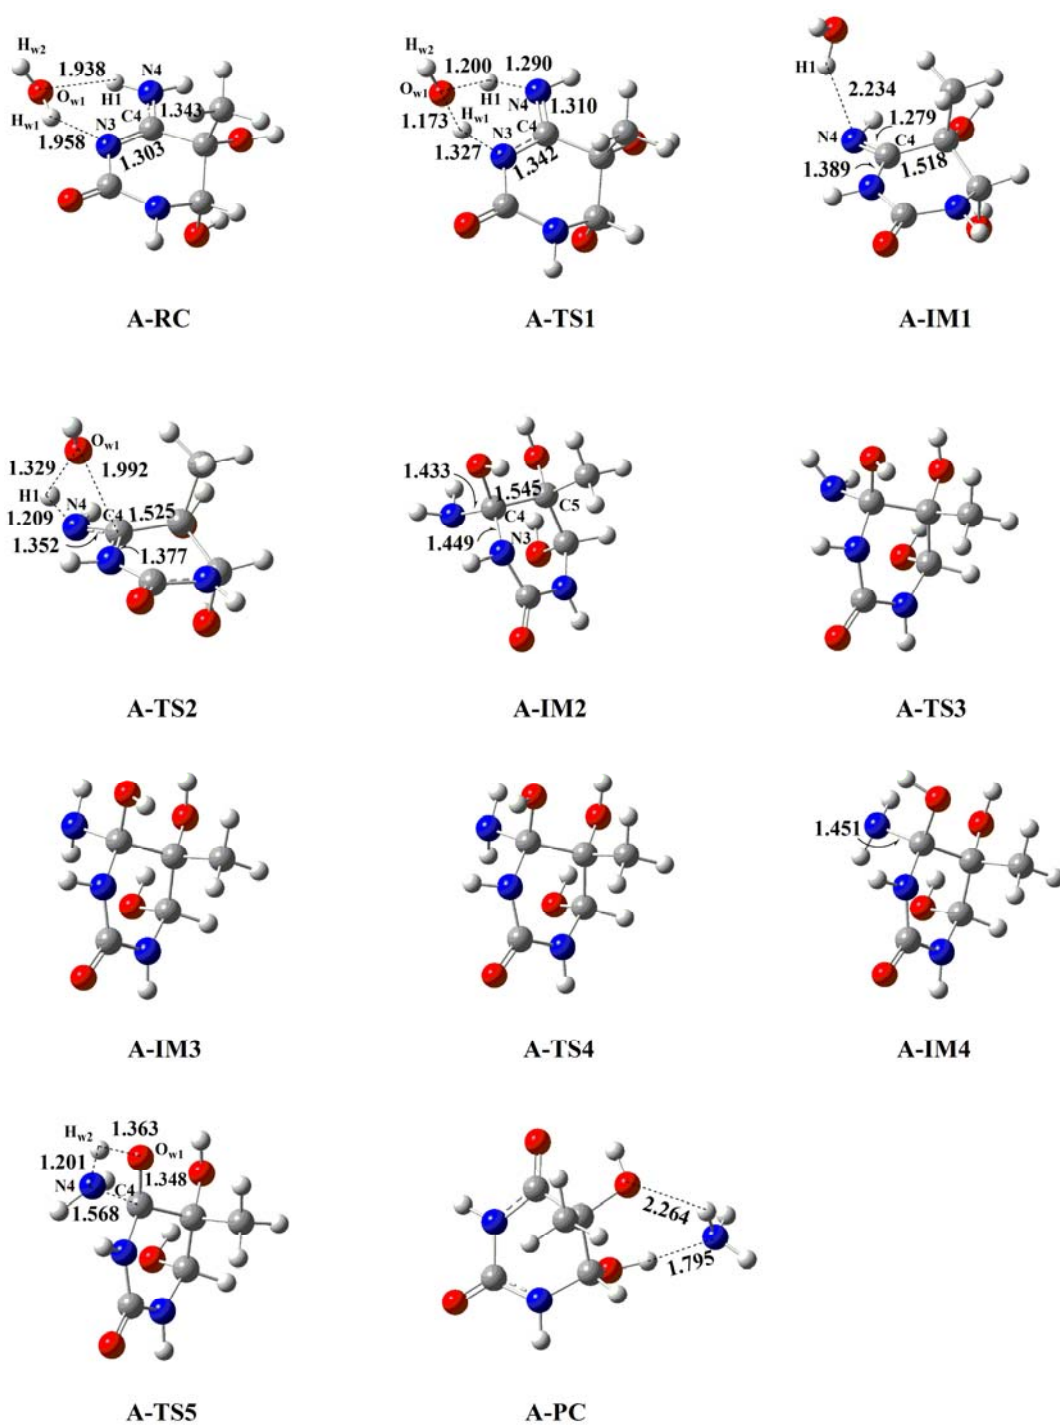

**Figure S1.** Selected MP2/6-311G(d,p) geometrical parameters for the direct deamination mechanism of mCg (path A). (bond length in angstroms).

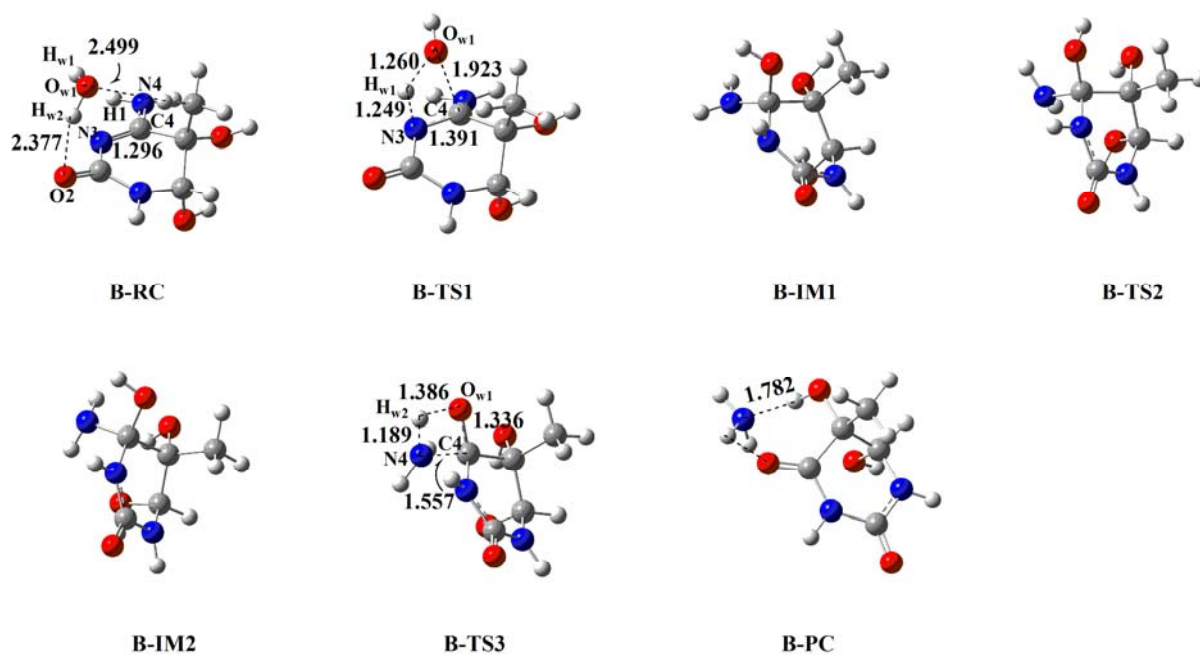

**Figure S2.** Selected MP2/6-311G(d,p) geometrical parameters for the direct deamination mechanism of mCg (path B). (bond length in angstroms).

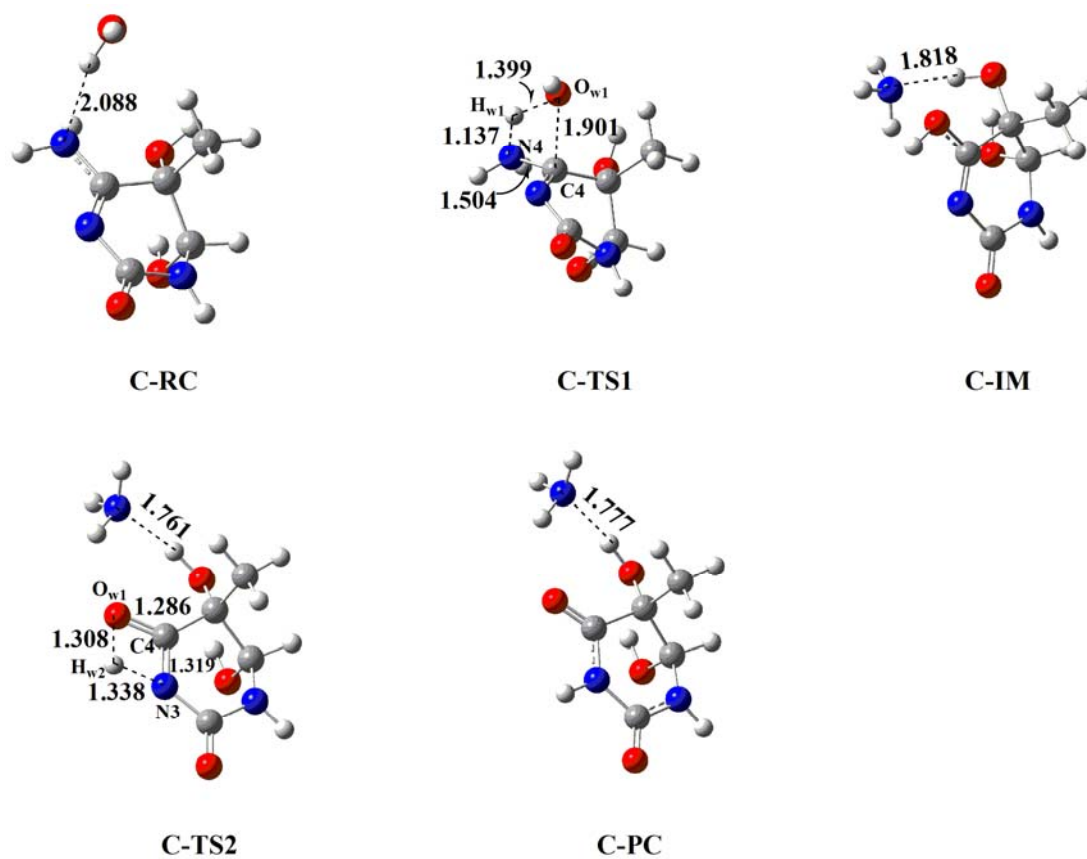

**Figure S3.** Selected MP2/6-311G(d,p) geometrical parameters for the direct deamination mechanism of mCg (path C). (bond length in angstroms).

## ***I. Gas Structures of Cis-(5S,6S)-mCg***

### **I.1 At the B3lyp/6-311g(d,p) Level**

#### **Direct Deamination Mechanism**

##### **Path A**

##### **A-RE (E=-662.528191324)**

|                                              |             |
|----------------------------------------------|-------------|
| Sum of electronic and zero-point Energies=   | -662.344279 |
| Sum of electronic and thermal Energies=      | -662.331052 |
| Sum of electronic and thermal Enthalpies=    | -662.330108 |
| Sum of electronic and thermal Free Energies= | -662.382922 |

|    |   |   |           |           |           |
|----|---|---|-----------|-----------|-----------|
| 1  | 7 | 0 | -0.823207 | 1.721830  | 0.173320  |
| 2  | 6 | 0 | -1.620920 | 0.650042  | -0.334776 |
| 3  | 6 | 0 | -1.102802 | -0.661781 | 0.289153  |
| 4  | 6 | 0 | 0.413212  | -0.689960 | 0.084576  |
| 5  | 7 | 0 | 0.965212  | -1.898503 | -0.075419 |
| 6  | 1 | 0 | 1.973366  | -1.936381 | -0.244563 |
| 7  | 1 | 0 | 0.360642  | -2.677014 | -0.279790 |
| 8  | 7 | 0 | 1.153524  | 0.378279  | 0.127013  |
| 9  | 6 | 0 | 0.574712  | 1.645779  | 0.225523  |
| 10 | 8 | 0 | 1.240201  | 2.648132  | 0.368303  |
| 11 | 1 | 0 | -2.661922 | 0.810670  | -0.019188 |
| 12 | 6 | 0 | -1.436698 | -0.767372 | 1.779749  |
| 13 | 1 | 0 | -1.027616 | 0.077341  | 2.333051  |
| 14 | 1 | 0 | -2.523544 | -0.765420 | 1.918778  |
| 15 | 1 | 0 | -1.029202 | -1.692046 | 2.192742  |

|    |   |   |           |           |           |
|----|---|---|-----------|-----------|-----------|
| 16 | 8 | 0 | -1.655727 | -1.775368 | -0.433096 |
| 17 | 1 | 0 | -2.493379 | -2.015907 | -0.022400 |
| 18 | 8 | 0 | -1.549597 | 0.591466  | -1.750196 |
| 19 | 1 | 0 | -1.814778 | -0.302077 | -2.005906 |
| 20 | 1 | 0 | -1.158619 | 2.662953  | 0.024809  |
| 21 | 1 | 0 | 2.986491  | -0.167925 | -0.283487 |
| 22 | 8 | 0 | 3.609768  | -0.914054 | -0.410457 |
| 23 | 1 | 0 | 4.197673  | -0.867105 | 0.349765  |

**A-TS1 (E=-662.502210944)**

Sum of electronic and zero-point Energies= -662.324703

Sum of electronic and thermal Energies= -662.312839

Sum of electronic and thermal Enthalpies= -662.311895

Sum of electronic and thermal Free Energies= -662.361657

|   |   |   |           |           |           |
|---|---|---|-----------|-----------|-----------|
| 1 | 7 | 0 | -0.557941 | 1.789180  | 0.214254  |
| 2 | 6 | 0 | -1.487767 | 0.829145  | -0.301016 |
| 3 | 6 | 0 | -1.143029 | -0.553240 | 0.295378  |
| 4 | 6 | 0 | 0.341517  | -0.800211 | 0.052754  |
| 5 | 7 | 0 | 0.810954  | -1.994635 | -0.188044 |
| 6 | 1 | 0 | 2.064244  | -1.897862 | -0.336626 |
| 7 | 1 | 0 | 0.116636  | -2.720443 | -0.303464 |
| 8 | 7 | 0 | 1.207974  | 0.219109  | 0.138130  |

|    |   |   |           |           |           |
|----|---|---|-----------|-----------|-----------|
| 9  | 6 | 0 | 0.821024  | 1.550413  | 0.219912  |
| 10 | 8 | 0 | 1.618508  | 2.456630  | 0.321585  |
| 11 | 1 | 0 | -2.496701 | 1.118444  | 0.026292  |
| 12 | 6 | 0 | -1.451897 | -0.631161 | 1.793456  |
| 13 | 1 | 0 | -0.900529 | 0.127339  | 2.348183  |
| 14 | 1 | 0 | -2.520636 | -0.461145 | 1.963463  |
| 15 | 1 | 0 | -1.185007 | -1.616843 | 2.179404  |
| 16 | 8 | 0 | -1.858336 | -1.564826 | -0.426308 |
| 17 | 1 | 0 | -2.711475 | -1.695959 | 0.001170  |
| 18 | 8 | 0 | -1.430920 | 0.783135  | -1.716563 |
| 19 | 1 | 0 | -1.808928 | -0.065763 | -1.983310 |
| 20 | 1 | 0 | -0.776283 | 2.764597  | 0.067813  |
| 21 | 1 | 0 | 2.373911  | -0.272530 | -0.102563 |
| 22 | 8 | 0 | 3.100800  | -1.216924 | -0.392638 |
| 23 | 1 | 0 | 3.698348  | -1.409211 | 0.337743  |

**A-IM1 (E=-662.523404500)**

|                                              |             |
|----------------------------------------------|-------------|
| Sum of electronic and zero-point Energies=   | -662.340088 |
| Sum of electronic and thermal Energies=      | -662.326185 |
| Sum of electronic and thermal Enthalpies=    | -662.325240 |
| Sum of electronic and thermal Free Energies= | -662.380349 |

|   |   |   |          |           |          |
|---|---|---|----------|-----------|----------|
| 1 | 7 | 0 | 1.882288 | -0.078439 | 0.738248 |
|---|---|---|----------|-----------|----------|



|    |   |   |           |           |           |
|----|---|---|-----------|-----------|-----------|
| 2  | 6 | 0 | 1.223699  | 1.146834  | 0.374073  |
| 3  | 6 | 0 | -0.293878 | 0.894809  | 0.248449  |
| 4  | 6 | 0 | -0.529030 | -0.291035 | -0.692986 |
| 5  | 7 | 0 | -1.494445 | -0.399327 | -1.514525 |
| 6  | 1 | 0 | -3.136847 | -1.177802 | -0.387919 |
| 7  | 1 | 0 | -2.019516 | 0.475527  | -1.514976 |
| 8  | 7 | 0 | 0.366869  | -1.331341 | -0.526676 |
| 9  | 6 | 0 | 1.611131  | -1.277668 | 0.105382  |
| 10 | 8 | 0 | 2.357565  | -2.230732 | 0.122572  |
| 11 | 1 | 0 | 1.398501  | 1.873502  | 1.178710  |
| 12 | 6 | 0 | -0.955554 | 0.611032  | 1.601442  |
| 13 | 1 | 0 | -0.457256 | -0.213735 | 2.111963  |
| 14 | 1 | 0 | -0.879098 | 1.494214  | 2.245423  |
| 15 | 1 | 0 | -2.004669 | 0.344726  | 1.454914  |
| 16 | 8 | 0 | -0.875855 | 2.040224  | -0.381232 |
| 17 | 1 | 0 | -1.309901 | 2.572814  | 0.292454  |
| 18 | 8 | 0 | 1.745279  | 1.630727  | -0.849567 |
| 19 | 1 | 0 | 1.104471  | 2.272748  | -1.185397 |
| 20 | 1 | 0 | 2.843345  | -0.013036 | 1.041784  |
| 21 | 1 | 0 | 0.214407  | -2.157663 | -1.089504 |
| 22 | 8 | 0 | -3.698997 | -1.109085 | 0.398246  |
| 23 | 1 | 0 | -3.598558 | -1.960462 | 0.834908  |

**A-TS2 (E=-662.449451995)**

|                                              |             |
|----------------------------------------------|-------------|
| Sum of electronic and zero-point Energies=   | -662.267672 |
| Sum of electronic and thermal Energies=      | -662.255379 |
| Sum of electronic and thermal Enthalpies=    | -662.254434 |
| Sum of electronic and thermal Free Energies= | -662.305047 |

|    |   |   |           |           |           |
|----|---|---|-----------|-----------|-----------|
| 1  | 7 | 0 | 1.735748  | 0.404468  | 0.623720  |
| 2  | 6 | 0 | 0.772670  | 1.416146  | 0.282995  |
| 3  | 6 | 0 | -0.643776 | 0.794962  | 0.313926  |
| 4  | 6 | 0 | -0.650044 | -0.479906 | -0.529535 |
| 5  | 7 | 0 | -1.614755 | -0.721855 | -1.425664 |
| 6  | 1 | 0 | -1.991698 | -1.669069 | -1.079570 |
| 7  | 1 | 0 | -2.335864 | -0.011517 | -1.358721 |
| 8  | 7 | 0 | 0.510522  | -1.177957 | -0.577387 |
| 9  | 6 | 0 | 1.723602  | -0.843650 | 0.039829  |
| 10 | 8 | 0 | 2.658389  | -1.610336 | 0.045947  |
| 11 | 1 | 0 | 0.822914  | 2.199585  | 1.049477  |
| 12 | 6 | 0 | -1.101998 | 0.490730  | 1.744331  |
| 13 | 1 | 0 | -0.343502 | -0.086936 | 2.271392  |
| 14 | 1 | 0 | -1.251778 | 1.434744  | 2.282652  |
| 15 | 1 | 0 | -2.004144 | -0.119786 | 1.705824  |

|    |   |   |           |           |           |
|----|---|---|-----------|-----------|-----------|
| 16 | 8 | 0 | -1.527130 | 1.726413  | -0.324186 |
| 17 | 1 | 0 | -2.111429 | 2.095641  | 0.345072  |
| 18 | 8 | 0 | 1.063109  | 1.951094  | -0.993219 |
| 19 | 1 | 0 | 0.268705  | 2.420485  | -1.282416 |
| 20 | 1 | 0 | 2.662056  | 0.706299  | 0.888693  |
| 21 | 1 | 0 | 0.492129  | -2.091601 | -1.010257 |
| 22 | 8 | 0 | -1.876998 | -2.054018 | 0.476050  |
| 23 | 1 | 0 | -1.769683 | -2.785352 | 1.097160  |

**A-IM2 (E=-662.517259502)**

|                                              |             |
|----------------------------------------------|-------------|
| Sum of electronic and zero-point Energies=   | -662.330717 |
| Sum of electronic and thermal Energies=      | -662.318694 |
| Sum of electronic and thermal Enthalpies=    | -662.317749 |
| Sum of electronic and thermal Free Energies= | -662.367243 |

|   |   |   |           |           |           |
|---|---|---|-----------|-----------|-----------|
| 1 | 7 | 0 | 1.423231  | 1.033720  | 0.405659  |
| 2 | 6 | 0 | 0.081966  | 1.500603  | 0.190628  |
| 3 | 6 | 0 | -0.915070 | 0.339463  | 0.424566  |
| 4 | 6 | 0 | -0.450419 | -0.948654 | -0.330324 |
| 5 | 7 | 0 | -0.566446 | -0.780811 | -1.749140 |
| 6 | 1 | 0 | -0.554251 | -1.689653 | -2.200680 |
| 7 | 1 | 0 | -1.432380 | -0.310348 | -1.982941 |

|    |   |   |           |           |           |
|----|---|---|-----------|-----------|-----------|
| 8  | 7 | 0 | 0.915706  | -1.234496 | 0.083071  |
| 9  | 6 | 0 | 1.893450  | -0.239828 | 0.144449  |
| 10 | 8 | 0 | 3.077849  | -0.496990 | 0.073373  |
| 11 | 1 | 0 | -0.133306 | 2.270295  | 0.944945  |
| 12 | 6 | 0 | -1.073574 | 0.087796  | 1.926517  |
| 13 | 1 | 0 | -0.137425 | -0.239712 | 2.380181  |
| 14 | 1 | 0 | -1.394686 | 1.010253  | 2.413135  |
| 15 | 1 | 0 | -1.837501 | -0.671200 | 2.110364  |
| 16 | 8 | 0 | -2.152887 | 0.794755  | -0.127901 |
| 17 | 1 | 0 | -2.813837 | 0.112566  | 0.039464  |
| 18 | 8 | 0 | -0.020998 | 2.080198  | -1.094581 |
| 19 | 1 | 0 | -0.961744 | 2.213313  | -1.264817 |
| 20 | 1 | 0 | 2.153352  | 1.729821  | 0.366053  |
| 21 | 1 | 0 | 1.299924  | -2.089297 | -0.300782 |
| 22 | 8 | 0 | -1.260780 | -2.069749 | 0.056514  |
| 23 | 1 | 0 | -0.959165 | -2.366925 | 0.923694  |

**A-TS3 (E=-662.516884220)**

|                                              |             |
|----------------------------------------------|-------------|
| Sum of electronic and zero-point Energies=   | -662.330671 |
| Sum of electronic and thermal Energies=      | -662.319263 |
| Sum of electronic and thermal Enthalpies=    | -662.318319 |
| Sum of electronic and thermal Free Energies= | -662.366627 |

|    |   |   |           |           |           |
|----|---|---|-----------|-----------|-----------|
| 1  | 7 | 0 | 1.426428  | 1.032260  | 0.390249  |
| 2  | 6 | 0 | 0.085707  | 1.496446  | 0.194815  |
| 3  | 6 | 0 | -0.907170 | 0.338352  | 0.442805  |
| 4  | 6 | 0 | -0.454762 | -0.942637 | -0.336170 |
| 5  | 7 | 0 | -0.579940 | -0.797249 | -1.761668 |
| 6  | 1 | 0 | -0.975776 | -1.640604 | -2.158890 |
| 7  | 1 | 0 | -1.141470 | 0.003784  | -2.013626 |
| 8  | 7 | 0 | 0.914387  | -1.240878 | 0.085211  |
| 9  | 6 | 0 | 1.892715  | -0.246899 | 0.137283  |
| 10 | 8 | 0 | 3.077200  | -0.499547 | 0.057416  |
| 11 | 1 | 0 | -0.121789 | 2.278832  | 0.937302  |
| 12 | 6 | 0 | -1.036145 | 0.069356  | 1.945166  |
| 13 | 1 | 0 | -0.093059 | -0.260929 | 2.381587  |
| 14 | 1 | 0 | -1.354117 | 0.985618  | 2.445761  |
| 15 | 1 | 0 | -1.796554 | -0.692132 | 2.131844  |
| 16 | 8 | 0 | -2.153335 | 0.801595  | -0.076263 |
| 17 | 1 | 0 | -2.778663 | 0.068949  | -0.020496 |
| 18 | 8 | 0 | -0.043693 | 2.055585  | -1.104765 |
| 19 | 1 | 0 | -0.960885 | 2.346427  | -1.185823 |
| 20 | 1 | 0 | 2.158656  | 1.725869  | 0.348079  |
| 21 | 1 | 0 | 1.293713  | -2.072599 | -0.352599 |

|    |   |   |           |           |          |
|----|---|---|-----------|-----------|----------|
| 22 | 8 | 0 | -1.267835 | -2.057571 | 0.036981 |
| 23 | 1 | 0 | -0.936938 | -2.390353 | 0.879973 |

**A-IM3 (E=-662.520428130)**

Sum of electronic and zero-point Energies= -662.333533

Sum of electronic and thermal Energies= -662.321619

Sum of electronic and thermal Enthalpies= -662.320675

Sum of electronic and thermal Free Energies= -662.369783

|    |   |   |           |           |           |
|----|---|---|-----------|-----------|-----------|
| 1  | 7 | 0 | 1.443362  | 1.004854  | 0.427390  |
| 2  | 6 | 0 | 0.123651  | 1.486059  | 0.158009  |
| 3  | 6 | 0 | -0.897605 | 0.370445  | 0.452666  |
| 4  | 6 | 0 | -0.493518 | -0.936473 | -0.325670 |
| 5  | 7 | 0 | -0.654426 | -0.895424 | -1.762436 |
| 6  | 1 | 0 | -1.641300 | -0.889717 | -1.997183 |
| 7  | 1 | 0 | -0.243109 | -0.038370 | -2.120891 |
| 8  | 7 | 0 | 0.885930  | -1.241502 | 0.014609  |
| 9  | 6 | 0 | 1.885878  | -0.281016 | 0.150664  |
| 10 | 8 | 0 | 3.065102  | -0.561994 | 0.099889  |
| 11 | 1 | 0 | -0.082491 | 2.331218  | 0.825839  |
| 12 | 6 | 0 | -1.009252 | 0.142685  | 1.963700  |
| 13 | 1 | 0 | -0.082549 | -0.246094 | 2.387787  |

|    |   |   |           |           |           |
|----|---|---|-----------|-----------|-----------|
| 14 | 1 | 0 | -1.249955 | 1.086377  | 2.457778  |
| 15 | 1 | 0 | -1.816990 | -0.559718 | 2.181585  |
| 16 | 8 | 0 | -2.136753 | 0.860498  | -0.058704 |
| 17 | 1 | 0 | -2.793263 | 0.163364  | 0.056006  |
| 18 | 8 | 0 | 0.038887  | 1.941181  | -1.194381 |
| 19 | 1 | 0 | -0.892386 | 2.153817  | -1.345196 |
| 20 | 1 | 0 | 2.193590  | 1.680236  | 0.421445  |
| 21 | 1 | 0 | 1.234471  | -2.070286 | -0.452715 |
| 22 | 8 | 0 | -1.339713 | -1.999386 | 0.088693  |
| 23 | 1 | 0 | -1.025201 | -2.298914 | 0.948425  |

**A-TS4 (E=-662.518708387)**

|                                              |             |
|----------------------------------------------|-------------|
| Sum of electronic and zero-point Energies=   | -662.332441 |
| Sum of electronic and thermal Energies=      | -662.320947 |
| Sum of electronic and thermal Enthalpies=    | -662.320003 |
| Sum of electronic and thermal Free Energies= | -662.368447 |

|   |   |   |           |           |           |
|---|---|---|-----------|-----------|-----------|
| 1 | 7 | 0 | 1.439618  | 1.006262  | 0.444128  |
| 2 | 6 | 0 | 0.126194  | 1.486193  | 0.141032  |
| 3 | 6 | 0 | -0.901812 | 0.381050  | 0.442748  |
| 4 | 6 | 0 | -0.498663 | -0.938612 | -0.309215 |
| 5 | 7 | 0 | -0.656548 | -0.935616 | -1.750697 |

|    |   |   |           |           |           |
|----|---|---|-----------|-----------|-----------|
| 6  | 1 | 0 | -1.643989 | -0.889015 | -1.978690 |
| 7  | 1 | 0 | -0.209943 | -0.108872 | -2.139592 |
| 8  | 7 | 0 | 0.886004  | -1.240826 | 0.012780  |
| 9  | 6 | 0 | 1.883450  | -0.276387 | 0.167630  |
| 10 | 8 | 0 | 3.062123  | -0.560268 | 0.118408  |
| 11 | 1 | 0 | -0.089122 | 2.344106  | 0.788780  |
| 12 | 6 | 0 | -1.027845 | 0.173959  | 1.953315  |
| 13 | 1 | 0 | -0.096357 | -0.188451 | 2.388979  |
| 14 | 1 | 0 | -1.294019 | 1.120629  | 2.429566  |
| 15 | 1 | 0 | -1.806643 | -0.559358 | 2.163403  |
| 16 | 8 | 0 | -2.132217 | 0.870985  | -0.095096 |
| 17 | 1 | 0 | -2.827302 | 0.249830  | 0.149356  |
| 18 | 8 | 0 | 0.069559  | 1.913817  | -1.221940 |
| 19 | 1 | 0 | -0.856157 | 2.133620  | -1.394111 |
| 20 | 1 | 0 | 2.190785  | 1.680698  | 0.448818  |
| 21 | 1 | 0 | 1.248517  | -2.028386 | -0.513298 |
| 22 | 8 | 0 | -1.368619 | -1.952236 | 0.182820  |
| 23 | 1 | 0 | -0.833993 | -2.699142 | 0.466719  |

**A-IM4 (E=-662.524597457)**

Sum of electronic and zero-point Energies= -662.337410

Sum of electronic and thermal Energies= -662.325577



Sum of electronic and thermal Enthalpies= -662.324633

Sum of electronic and thermal Free Energies= -662.373652

|    |   |   |           |           |           |
|----|---|---|-----------|-----------|-----------|
| 1  | 7 | 0 | 1.462409  | 1.007142  | 0.376949  |
| 2  | 6 | 0 | 0.140830  | 1.484498  | 0.112732  |
| 3  | 6 | 0 | -0.884794 | 0.387045  | 0.461794  |
| 4  | 6 | 0 | -0.506300 | -0.935689 | -0.278729 |
| 5  | 7 | 0 | -0.709385 | -0.943243 | -1.719646 |
| 6  | 1 | 0 | -1.626912 | -0.554535 | -1.921670 |
| 7  | 1 | 0 | -0.033588 | -0.330664 | -2.165684 |
| 8  | 7 | 0 | 0.882768  | -1.230789 | 0.019060  |
| 9  | 6 | 0 | 1.892111  | -0.293211 | 0.149854  |
| 10 | 8 | 0 | 3.069854  | -0.591463 | 0.130169  |
| 11 | 1 | 0 | -0.054366 | 2.349388  | 0.758217  |
| 12 | 6 | 0 | -0.976021 | 0.197760  | 1.976983  |
| 13 | 1 | 0 | -0.026048 | -0.131416 | 2.397333  |
| 14 | 1 | 0 | -1.260726 | 1.144323  | 2.442586  |
| 15 | 1 | 0 | -1.727328 | -0.556038 | 2.214966  |
| 16 | 8 | 0 | -2.129691 | 0.865526  | -0.055766 |
| 17 | 1 | 0 | -2.812635 | 0.250228  | 0.234951  |
| 18 | 8 | 0 | 0.044777  | 1.895778  | -1.252199 |
| 19 | 1 | 0 | -0.882512 | 2.122226  | -1.402493 |

|    |   |   |           |           |           |
|----|---|---|-----------|-----------|-----------|
| 20 | 1 | 0 | 2.215918  | 1.677536  | 0.347567  |
| 21 | 1 | 0 | 1.221083  | -2.137397 | -0.271801 |
| 22 | 8 | 0 | -1.362396 | -1.933849 | 0.246382  |
| 23 | 1 | 0 | -1.438737 | -2.595766 | -0.453010 |

**A-TS5 (E=-662.475046767)**

|                                              |             |
|----------------------------------------------|-------------|
| Sum of electronic and zero-point Energies=   | -662.293487 |
| Sum of electronic and thermal Energies=      | -662.281708 |
| Sum of electronic and thermal Enthalpies=    | -662.280764 |
| Sum of electronic and thermal Free Energies= | -662.330108 |

|    |   |   |           |           |           |
|----|---|---|-----------|-----------|-----------|
| 1  | 7 | 0 | 1.432099  | 1.076908  | 0.115479  |
| 2  | 6 | 0 | 0.064815  | 1.498259  | 0.068625  |
| 3  | 6 | 0 | -0.848854 | 0.354561  | 0.550084  |
| 4  | 6 | 0 | -0.452445 | -0.976781 | -0.134001 |
| 5  | 7 | 0 | -0.816565 | -0.945349 | -1.677173 |
| 6  | 1 | 0 | -1.339790 | -0.115317 | -1.943425 |
| 7  | 1 | 0 | -0.017096 | -1.069787 | -2.293360 |
| 8  | 7 | 0 | 0.952102  | -1.204278 | 0.047375  |
| 9  | 6 | 0 | 1.921943  | -0.220273 | 0.076248  |
| 10 | 8 | 0 | 3.112548  | -0.462040 | 0.095028  |
| 11 | 1 | 0 | -0.061763 | 2.358154  | 0.738392  |

|    |   |   |           |           |           |
|----|---|---|-----------|-----------|-----------|
| 12 | 6 | 0 | -0.799288 | 0.190473  | 2.069570  |
| 13 | 1 | 0 | 0.221715  | 0.068811  | 2.433279  |
| 14 | 1 | 0 | -1.242030 | 1.071428  | 2.539267  |
| 15 | 1 | 0 | -1.370678 | -0.695274 | 2.352094  |
| 16 | 8 | 0 | -2.170693 | 0.693264  | 0.129550  |
| 17 | 1 | 0 | -2.708753 | -0.087781 | 0.323926  |
| 18 | 8 | 0 | -0.260926 | 1.907836  | -1.263832 |
| 19 | 1 | 0 | -1.170653 | 2.230947  | -1.228346 |
| 20 | 1 | 0 | 2.152709  | 1.778993  | 0.052215  |
| 21 | 1 | 0 | 1.270086  | -2.161116 | 0.091960  |
| 22 | 8 | 0 | -1.258000 | -2.020842 | 0.154687  |
| 23 | 1 | 0 | -1.407652 | -1.893194 | -1.172381 |

**A-PC (E=-662.556914126)**

|                                              |             |
|----------------------------------------------|-------------|
| Sum of electronic and zero-point Energies=   | -662.372214 |
| Sum of electronic and thermal Energies=      | -662.358906 |
| Sum of electronic and thermal Enthalpies=    | -662.357961 |
| Sum of electronic and thermal Free Energies= | -662.411375 |

|   |   |   |           |           |          |
|---|---|---|-----------|-----------|----------|
| 1 | 7 | 0 | -1.061378 | -1.235674 | 0.731861 |
| 2 | 6 | 0 | 0.332631  | -0.852348 | 0.576833 |
| 3 | 6 | 0 | 0.386499  | 0.694518  | 0.524400 |

|    |   |   |           |           |           |
|----|---|---|-----------|-----------|-----------|
| 4  | 6 | 0 | -0.541947 | 1.170819  | -0.597915 |
| 5  | 7 | 0 | 3.618038  | -1.130159 | -0.476244 |
| 6  | 1 | 0 | 3.523974  | -0.197837 | -0.080673 |
| 7  | 1 | 0 | 4.267128  | -1.664933 | 0.091457  |
| 8  | 7 | 0 | -1.726021 | 0.491564  | -0.703868 |
| 9  | 6 | 0 | -2.044075 | -0.741588 | -0.092565 |
| 10 | 8 | 0 | -3.117280 | -1.266228 | -0.280596 |
| 11 | 1 | 0 | 0.866700  | -1.184216 | 1.477332  |
| 12 | 6 | 0 | -0.039936 | 1.335121  | 1.855327  |
| 13 | 1 | 0 | -1.043556 | 1.036056  | 2.159174  |
| 14 | 1 | 0 | 0.667134  | 1.036155  | 2.632903  |
| 15 | 1 | 0 | -0.002621 | 2.422646  | 1.762234  |
| 16 | 8 | 0 | 1.702564  | 1.111434  | 0.202915  |
| 17 | 1 | 0 | 1.589089  | 1.808591  | -0.464199 |
| 18 | 8 | 0 | 0.846137  | -1.449328 | -0.575578 |
| 19 | 1 | 0 | 1.834885  | -1.417783 | -0.550460 |
| 20 | 1 | 0 | -1.234338 | -2.197170 | 0.990159  |
| 21 | 1 | 0 | -2.392965 | 0.810126  | -1.395210 |
| 22 | 8 | 0 | -0.240519 | 2.111974  | -1.306689 |
| 23 | 1 | 0 | 4.023863  | -1.033695 | -1.401857 |

**Path B**

**B-RE (E=-662.521306410)**

Sum of electronic and zero-point Energies= -662.338437  
Sum of electronic and thermal Energies= -662.324508  
Sum of electronic and thermal Enthalpies= -662.323564  
Sum of electronic and thermal Free Energies= -662.378777

|    |   |   |           |           |           |
|----|---|---|-----------|-----------|-----------|
| 1  | 7 | 0 | -0.521575 | 1.475802  | -0.426227 |
| 2  | 6 | 0 | 0.857375  | 1.187992  | -0.651341 |
| 3  | 6 | 0 | 1.063916  | -0.332107 | -0.468125 |
| 4  | 6 | 0 | 0.410037  | -0.696768 | 0.863854  |
| 5  | 7 | 0 | 1.044108  | -1.632439 | 1.593804  |
| 6  | 1 | 0 | 0.680561  | -1.843015 | 2.510371  |
| 7  | 1 | 0 | 1.996156  | -1.862606 | 1.360429  |
| 8  | 7 | 0 | -0.719062 | -0.203212 | 1.250711  |
| 9  | 6 | 0 | -1.309134 | 0.816622  | 0.504801  |
| 10 | 8 | 0 | -2.480364 | 1.129141  | 0.646470  |
| 11 | 1 | 0 | 1.107159  | 1.457476  | -1.687438 |
| 12 | 6 | 0 | 0.439670  | -1.157705 | -1.596656 |
| 13 | 1 | 0 | -0.649157 | -1.072573 | -1.607057 |
| 14 | 1 | 0 | 0.827538  | -0.823732 | -2.565341 |
| 15 | 1 | 0 | 0.694883  | -2.211496 | -1.459638 |
| 16 | 8 | 0 | 2.476071  | -0.589944 | -0.358442 |
| 17 | 1 | 0 | 2.808965  | -0.813236 | -1.234254 |
| 18 | 8 | 0 | 1.675527  | 1.915592  | 0.250186  |

|    |   |   |           |           |           |
|----|---|---|-----------|-----------|-----------|
| 19 | 1 | 0 | 2.538387  | 1.480206  | 0.247712  |
| 20 | 1 | 0 | -0.929432 | 2.310522  | -0.817926 |
| 21 | 1 | 0 | -2.758711 | -1.783774 | -0.100282 |
| 22 | 8 | 0 | -2.986669 | -1.305267 | -0.904600 |
| 23 | 1 | 0 | -3.188353 | -0.423209 | -0.558697 |

**B-TS1 (E=-662.448115754)**

Sum of electronic and zero-point Energies= -662.269107

Sum of electronic and thermal Energies= -662.256504

Sum of electronic and thermal Enthalpies= -662.255560

Sum of electronic and thermal Free Energies= -662.306463

|    |   |   |           |           |           |
|----|---|---|-----------|-----------|-----------|
| 1  | 7 | 0 | -1.191443 | -1.314089 | 0.413473  |
| 2  | 6 | 0 | 0.208967  | -1.551411 | 0.285601  |
| 3  | 6 | 0 | 0.972840  | -0.201359 | 0.449183  |
| 4  | 6 | 0 | 0.314486  | 0.733081  | -0.555568 |
| 5  | 7 | 0 | 1.021156  | 1.068523  | -1.627804 |
| 6  | 1 | 0 | 0.555992  | 1.561489  | -2.374388 |
| 7  | 1 | 0 | 2.027600  | 1.037769  | -1.578290 |
| 8  | 7 | 0 | -1.061717 | 0.802549  | -0.638028 |
| 9  | 6 | 0 | -1.858960 | -0.184070 | -0.055332 |
| 10 | 8 | 0 | -3.061148 | -0.076911 | 0.042385  |
| 11 | 1 | 0 | 0.527756  | -2.214054 | 1.101754  |

|    |   |   |           |           |           |
|----|---|---|-----------|-----------|-----------|
| 12 | 6 | 0 | 0.924900  | 0.301132  | 1.887241  |
| 13 | 1 | 0 | -0.098155 | 0.479114  | 2.210529  |
| 14 | 1 | 0 | 1.375749  | -0.451077 | 2.544793  |
| 15 | 1 | 0 | 1.446920  | 1.253107  | 1.962219  |
| 16 | 8 | 0 | 2.330341  | -0.422620 | 0.025337  |
| 17 | 1 | 0 | 2.892937  | -0.400506 | 0.805204  |
| 18 | 8 | 0 | 0.504088  | -2.148177 | -0.966439 |
| 19 | 1 | 0 | 1.464731  | -2.116213 | -1.066099 |
| 20 | 1 | 0 | -1.798136 | -2.089005 | 0.632884  |
| 21 | 1 | 0 | -1.086871 | 1.866661  | -0.187647 |
| 22 | 8 | 0 | -0.068174 | 2.551735  | 0.491110  |
| 23 | 1 | 0 | 0.301260  | 3.357386  | 0.109662  |

**B-IM1 (E=-662.530769246)**

Sum of electronic and zero-point Energies= -662.343023

Sum of electronic and thermal Energies= -662.331481

Sum of electronic and thermal Enthalpies= -662.330537

Sum of electronic and thermal Free Energies= -662.379028

|   |   |   |           |          |          |
|---|---|---|-----------|----------|----------|
| 1 | 7 | 0 | 1.388589  | 1.089440 | 0.315800 |
| 2 | 6 | 0 | 0.008058  | 1.485779 | 0.196054 |
| 3 | 6 | 0 | -0.917332 | 0.279290 | 0.510593 |

|    |   |   |           |           |           |
|----|---|---|-----------|-----------|-----------|
| 4  | 6 | 0 | -0.416903 | -0.944878 | -0.314933 |
| 5  | 7 | 0 | -0.582303 | -0.632001 | -1.746107 |
| 6  | 1 | 0 | -0.168437 | -1.378065 | -2.297445 |
| 7  | 1 | 0 | -1.572836 | -0.589633 | -1.970403 |
| 8  | 7 | 0 | 0.968245  | -1.177668 | -0.015786 |
| 9  | 6 | 0 | 1.911865  | -0.177110 | 0.118739  |
| 10 | 8 | 0 | 3.106930  | -0.397825 | 0.116331  |
| 11 | 1 | 0 | -0.194941 | 2.280346  | 0.917100  |
| 12 | 6 | 0 | -0.963150 | -0.017844 | 2.005343  |
| 13 | 1 | 0 | 0.021783  | -0.275515 | 2.394228  |
| 14 | 1 | 0 | -1.338901 | 0.862348  | 2.530517  |
| 15 | 1 | 0 | -1.637390 | -0.850885 | 2.202617  |
| 16 | 8 | 0 | -2.242654 | 0.582902  | 0.076669  |
| 17 | 1 | 0 | -2.154069 | 1.317057  | -0.550936 |
| 18 | 8 | 0 | -0.317735 | 2.057152  | -1.065711 |
| 19 | 1 | 0 | -0.183508 | 1.337408  | -1.713057 |
| 20 | 1 | 0 | 2.089950  | 1.814464  | 0.319538  |
| 21 | 1 | 0 | 1.338033  | -2.102434 | -0.178626 |
| 22 | 8 | 0 | -1.086988 | -2.137528 | 0.048081  |
| 23 | 1 | 0 | -2.033060 | -1.962510 | -0.028631 |

**B-TS2 (E=-662.514505893)**



|                                              |             |
|----------------------------------------------|-------------|
| Sum of electronic and zero-point Energies=   | -662.329095 |
| Sum of electronic and thermal Energies=      | -662.317313 |
| Sum of electronic and thermal Enthalpies=    | -662.316369 |
| Sum of electronic and thermal Free Energies= | -662.365514 |

|    |   |   |           |           |           |
|----|---|---|-----------|-----------|-----------|
| 1  | 7 | 0 | 1.416717  | 1.049927  | 0.242924  |
| 2  | 6 | 0 | 0.053160  | 1.480590  | 0.232369  |
| 3  | 6 | 0 | -0.893184 | 0.294335  | 0.509960  |
| 4  | 6 | 0 | -0.447187 | -0.938464 | -0.354548 |
| 5  | 7 | 0 | -0.595815 | -0.736078 | -1.792707 |
| 6  | 1 | 0 | -1.309216 | -1.341824 | -2.173316 |
| 7  | 1 | 0 | -0.756999 | 0.228599  | -2.047132 |
| 8  | 7 | 0 | 0.933498  | -1.228724 | 0.000141  |
| 9  | 6 | 0 | 1.898067  | -0.256355 | 0.098441  |
| 10 | 8 | 0 | 3.091234  | -0.483946 | 0.110343  |
| 11 | 1 | 0 | -0.096547 | 2.248121  | 0.997322  |
| 12 | 6 | 0 | -0.901761 | -0.031286 | 2.002297  |
| 13 | 1 | 0 | 0.092724  | -0.287711 | 2.364841  |
| 14 | 1 | 0 | -1.277539 | 0.834883  | 2.550598  |
| 15 | 1 | 0 | -1.560628 | -0.876192 | 2.196756  |
| 16 | 8 | 0 | -2.229772 | 0.632918  | 0.163327  |
| 17 | 1 | 0 | -2.194532 | 1.149107  | -0.651928 |

|    |   |   |           |           |           |
|----|---|---|-----------|-----------|-----------|
| 18 | 8 | 0 | -0.332568 | 2.076906  | -1.032322 |
| 19 | 1 | 0 | 0.477260  | 2.235551  | -1.528979 |
| 20 | 1 | 0 | 2.142241  | 1.709489  | 0.479376  |
| 21 | 1 | 0 | 1.289733  | -2.113869 | -0.334986 |
| 22 | 8 | 0 | -1.182671 | -2.083095 | 0.016842  |
| 23 | 1 | 0 | -2.111645 | -1.817209 | -0.001695 |

**B-IM2 (E=-662.521650903)**

|                                              |             |
|----------------------------------------------|-------------|
| Sum of electronic and zero-point Energies=   | -662.334864 |
| Sum of electronic and thermal Energies=      | -662.322846 |
| Sum of electronic and thermal Enthalpies=    | -662.321902 |
| Sum of electronic and thermal Free Energies= | -662.371584 |

|   |   |   |           |           |           |
|---|---|---|-----------|-----------|-----------|
| 1 | 7 | 0 | 1.485747  | 0.974082  | 0.423945  |
| 2 | 6 | 0 | 0.183377  | 1.468633  | 0.119936  |
| 3 | 6 | 0 | -0.895491 | 0.419618  | 0.459760  |
| 4 | 6 | 0 | -0.552214 | -0.943384 | -0.259432 |
| 5 | 7 | 0 | -0.961149 | -1.031062 | -1.651978 |
| 6 | 1 | 0 | -1.934344 | -0.745697 | -1.721427 |
| 7 | 1 | 0 | -0.406500 | -0.399066 | -2.219824 |
| 8 | 7 | 0 | 0.883352  | -1.186053 | -0.188256 |
| 9 | 6 | 0 | 1.900952  | -0.315752 | 0.109456  |

|    |   |   |           |           |           |
|----|---|---|-----------|-----------|-----------|
| 10 | 8 | 0 | 3.073871  | -0.636505 | 0.124476  |
| 11 | 1 | 0 | -0.001100 | 2.365254  | 0.719110  |
| 12 | 6 | 0 | -1.013795 | 0.244889  | 1.971440  |
| 13 | 1 | 0 | -0.117720 | -0.207214 | 2.396499  |
| 14 | 1 | 0 | -1.183167 | 1.217406  | 2.439592  |
| 15 | 1 | 0 | -1.863012 | -0.401136 | 2.183599  |
| 16 | 8 | 0 | -2.149951 | 0.895725  | -0.007521 |
| 17 | 1 | 0 | -1.966078 | 1.396252  | -0.813457 |
| 18 | 8 | 0 | -0.006374 | 1.798366  | -1.276704 |
| 19 | 1 | 0 | 0.526155  | 2.571790  | -1.487476 |
| 20 | 1 | 0 | 2.249583  | 1.617627  | 0.562800  |
| 21 | 1 | 0 | 1.195566  | -2.109707 | -0.450028 |
| 22 | 8 | 0 | -1.251047 | -1.958483 | 0.426198  |
| 23 | 1 | 0 | -1.424000 | -2.641131 | -0.233931 |

**B-TS3 (E=-662.467203350)**

|                                              |             |
|----------------------------------------------|-------------|
| Sum of electronic and zero-point Energies=   | -662.285941 |
| Sum of electronic and thermal Energies=      | -662.274048 |
| Sum of electronic and thermal Enthalpies=    | -662.273104 |
| Sum of electronic and thermal Free Energies= | -662.322654 |

|   |   |   |          |          |          |
|---|---|---|----------|----------|----------|
| 1 | 7 | 0 | 1.501298 | 1.042707 | 0.169145 |
|---|---|---|----------|----------|----------|

|    |   |   |           |           |           |
|----|---|---|-----------|-----------|-----------|
| 2  | 6 | 0 | 0.152859  | 1.487176  | 0.049204  |
| 3  | 6 | 0 | -0.846980 | 0.416709  | 0.534354  |
| 4  | 6 | 0 | -0.516890 | -0.978869 | -0.101663 |
| 5  | 7 | 0 | -1.147336 | -1.094004 | -1.543088 |
| 6  | 1 | 0 | -1.883129 | -0.407122 | -1.685544 |
| 7  | 1 | 0 | -0.489054 | -1.108824 | -2.317900 |
| 8  | 7 | 0 | 0.922371  | -1.180662 | -0.196782 |
| 9  | 6 | 0 | 1.931224  | -0.269174 | 0.020249  |
| 10 | 8 | 0 | 3.106245  | -0.570594 | 0.092372  |
| 11 | 1 | 0 | 0.030243  | 2.391451  | 0.654857  |
| 12 | 6 | 0 | -0.831680 | 0.277161  | 2.052219  |
| 13 | 1 | 0 | 0.153612  | -0.011227 | 2.422041  |
| 14 | 1 | 0 | -1.127696 | 1.222850  | 2.511395  |
| 15 | 1 | 0 | -1.543116 | -0.500587 | 2.325757  |
| 16 | 8 | 0 | -2.161665 | 0.818166  | 0.145616  |
| 17 | 1 | 0 | -2.050428 | 1.475212  | -0.554211 |
| 18 | 8 | 0 | -0.236176 | 1.788136  | -1.312618 |
| 19 | 1 | 0 | 0.306881  | 2.515698  | -1.632168 |
| 20 | 1 | 0 | 2.246492  | 1.703783  | 0.320474  |
| 21 | 1 | 0 | 1.199388  | -2.145955 | -0.079256 |
| 22 | 8 | 0 | -1.157436 | -2.041727 | 0.401597  |
| 23 | 1 | 0 | -1.516470 | -2.061433 | -0.912285 |

**B-PC (E=-662.549015894)**

|                                              |             |
|----------------------------------------------|-------------|
| Sum of electronic and zero-point Energies=   | -662.365512 |
| Sum of electronic and thermal Energies=      | -662.351588 |
| Sum of electronic and thermal Enthalpies=    | -662.350644 |
| Sum of electronic and thermal Free Energies= | -662.405616 |

|    |   |   |           |           |           |
|----|---|---|-----------|-----------|-----------|
| 1  | 7 | 0 | -1.727474 | -0.812767 | -0.513565 |
| 2  | 6 | 0 | -0.338616 | -1.219504 | -0.617903 |
| 3  | 6 | 0 | 0.456113  | -0.693240 | 0.600274  |
| 4  | 6 | 0 | 0.226595  | 0.834594  | 0.679392  |
| 5  | 7 | 0 | 3.232765  | 0.820500  | -0.996514 |
| 6  | 1 | 0 | 2.979417  | 1.588033  | -0.379945 |
| 7  | 1 | 0 | 4.244750  | 0.761919  | -1.036177 |
| 8  | 7 | 0 | -1.063361 | 1.239440  | 0.364533  |
| 9  | 6 | 0 | -2.086061 | 0.484445  | -0.227772 |
| 10 | 8 | 0 | -3.182070 | 0.954290  | -0.440673 |
| 11 | 1 | 0 | -0.302095 | -2.312463 | -0.613078 |
| 12 | 6 | 0 | -0.060264 | -1.324561 | 1.904773  |
| 13 | 1 | 0 | -1.126186 | -1.163175 | 2.064437  |
| 14 | 1 | 0 | 0.139529  | -2.397956 | 1.870830  |
| 15 | 1 | 0 | 0.502664  | -0.902544 | 2.738088  |
| 16 | 8 | 0 | 1.801340  | -1.031562 | 0.503945  |

|    |   |   |           |           |           |
|----|---|---|-----------|-----------|-----------|
| 17 | 1 | 0 | 2.277310  | -0.445979 | -0.137130 |
| 18 | 8 | 0 | 0.296517  | -0.697987 | -1.778600 |
| 19 | 1 | 0 | -0.028592 | -1.171513 | -2.550156 |
| 20 | 1 | 0 | -2.432160 | -1.317103 | -1.031371 |
| 21 | 1 | 0 | -1.274651 | 2.221408  | 0.487385  |
| 22 | 8 | 0 | 1.065446  | 1.635401  | 1.027780  |
| 23 | 1 | 0 | 2.890025  | 1.037611  | -1.926263 |

### Path C

#### C-RE (E=-662.516475883)

|                                              |             |
|----------------------------------------------|-------------|
| Sum of electronic and zero-point Energies=   | -662.333248 |
| Sum of electronic and thermal Energies=      | -662.319490 |
| Sum of electronic and thermal Enthalpies=    | -662.318546 |
| Sum of electronic and thermal Free Energies= | -662.373222 |

|   |   |   |           |           |           |
|---|---|---|-----------|-----------|-----------|
| 1 | 7 | 0 | 1.922110  | -0.012945 | 0.716318  |
| 2 | 6 | 0 | 1.196844  | 1.175881  | 0.393807  |
| 3 | 6 | 0 | -0.293404 | 0.801442  | 0.252106  |
| 4 | 6 | 0 | -0.352427 | -0.421233 | -0.666496 |
| 5 | 7 | 0 | -1.477189 | -0.514409 | -1.447486 |
| 6 | 1 | 0 | -1.408522 | -1.202612 | -2.186173 |
| 7 | 1 | 0 | -1.891869 | 0.373867  | -1.698301 |
| 8 | 7 | 0 | 0.526445  | -1.353534 | -0.693339 |
| 9 | 6 | 0 | 1.694160  | -1.236861 | 0.084684  |

|    |   |   |           |           |           |
|----|---|---|-----------|-----------|-----------|
| 10 | 8 | 0 | 2.470507  | -2.155288 | 0.213061  |
| 11 | 1 | 0 | 1.306965  | 1.888829  | 1.222740  |
| 12 | 6 | 0 | -0.948223 | 0.496514  | 1.601911  |
| 13 | 1 | 0 | -0.401908 | -0.288664 | 2.125180  |
| 14 | 1 | 0 | -0.925421 | 1.393344  | 2.231396  |
| 15 | 1 | 0 | -1.983019 | 0.177366  | 1.461331  |
| 16 | 8 | 0 | -0.971090 | 1.883014  | -0.414038 |
| 17 | 1 | 0 | -1.475942 | 2.376825  | 0.240281  |
| 18 | 8 | 0 | 1.686024  | 1.749672  | -0.807908 |
| 19 | 1 | 0 | 1.017071  | 2.382592  | -1.101102 |
| 20 | 1 | 0 | 2.861994  | 0.087357  | 1.071469  |
| 21 | 1 | 0 | -3.123975 | -1.023376 | -0.208538 |
| 22 | 8 | 0 | -3.795373 | -0.987652 | 0.489475  |
| 23 | 1 | 0 | -3.677173 | -1.811730 | 0.972480  |

**C-TS1 (E=-662.437175831)**

Sum of electronic and zero-point Energies= -662.255659

Sum of electronic and thermal Energies= -662.243575

Sum of electronic and thermal Enthalpies= -662.242631

Sum of electronic and thermal Free Energies= -662.292714

|   |   |   |          |          |          |
|---|---|---|----------|----------|----------|
| 1 | 7 | 0 | 1.740430 | 0.669097 | 0.331313 |
| 2 | 6 | 0 | 0.579278 | 1.464577 | 0.115737 |

|    |   |   |           |           |           |
|----|---|---|-----------|-----------|-----------|
| 3  | 6 | 0 | -0.650740 | 0.599307  | 0.473072  |
| 4  | 6 | 0 | -0.468061 | -0.687820 | -0.345644 |
| 5  | 7 | 0 | -1.405356 | -0.829325 | -1.520875 |
| 6  | 1 | 0 | -0.877729 | -1.184947 | -2.314836 |
| 7  | 1 | 0 | -1.867629 | 0.059504  | -1.712247 |
| 8  | 7 | 0 | 0.672821  | -1.254831 | -0.535485 |
| 9  | 6 | 0 | 1.826017  | -0.695616 | 0.012206  |
| 10 | 8 | 0 | 2.868867  | -1.294498 | 0.153223  |
| 11 | 1 | 0 | 0.606351  | 2.331917  | 0.786135  |
| 12 | 6 | 0 | -0.728809 | 0.355945  | 1.977324  |
| 13 | 1 | 0 | 0.157318  | -0.166957 | 2.336705  |
| 14 | 1 | 0 | -0.799146 | 1.315886  | 2.496362  |
| 15 | 1 | 0 | -1.596881 | -0.265762 | 2.192159  |
| 16 | 8 | 0 | -1.806287 | 1.320538  | 0.014366  |
| 17 | 1 | 0 | -2.554302 | 1.027681  | 0.547498  |
| 18 | 8 | 0 | 0.507806  | 1.911774  | -1.241559 |
| 19 | 1 | 0 | -0.257809 | 2.496711  | -1.297109 |
| 20 | 1 | 0 | 2.629549  | 1.121362  | 0.476859  |
| 21 | 1 | 0 | -2.025964 | -1.556889 | -0.967382 |
| 22 | 8 | 0 | -1.871499 | -1.800060 | 0.493113  |
| 23 | 1 | 0 | -1.406223 | -2.593477 | 0.781871  |



**C-IM1 (E=-662.521857672)**

|                                              |             |
|----------------------------------------------|-------------|
| Sum of electronic and zero-point Energies=   | -662.337780 |
| Sum of electronic and thermal Energies=      | -662.324203 |
| Sum of electronic and thermal Enthalpies=    | -662.323259 |
| Sum of electronic and thermal Free Energies= | -662.377559 |

|    |   |   |           |           |           |
|----|---|---|-----------|-----------|-----------|
| 1  | 7 | 0 | 1.684354  | 0.325488  | -0.881638 |
| 2  | 6 | 0 | 0.347364  | 0.701358  | -1.221729 |
| 3  | 6 | 0 | -0.485983 | 0.951609  | 0.064505  |
| 4  | 6 | 0 | -0.095755 | -0.118434 | 1.076231  |
| 5  | 7 | 0 | -2.604225 | -1.775696 | -0.462826 |
| 6  | 1 | 0 | -1.770623 | -2.200989 | -0.860172 |
| 7  | 1 | 0 | -3.388782 | -2.020285 | -1.059362 |
| 8  | 7 | 0 | 0.992788  | -0.781604 | 1.119496  |
| 9  | 6 | 0 | 1.985991  | -0.572460 | 0.135987  |
| 10 | 8 | 0 | 3.061797  | -1.119485 | 0.199424  |
| 11 | 1 | 0 | 0.380038  | 1.635054  | -1.795566 |
| 12 | 6 | 0 | -0.172866 | 2.331192  | 0.657504  |
| 13 | 1 | 0 | 0.897827  | 2.462479  | 0.822724  |
| 14 | 1 | 0 | -0.525164 | 3.093854  | -0.040462 |
| 15 | 1 | 0 | -0.706232 | 2.455515  | 1.600321  |
| 16 | 8 | 0 | -1.860429 | 0.929252  | -0.255064 |

|    |   |   |           |           |           |
|----|---|---|-----------|-----------|-----------|
| 17 | 1 | 0 | -2.190161 | -0.002727 | -0.263994 |
| 18 | 8 | 0 | -0.246907 | -0.320444 | -2.022037 |
| 19 | 1 | 0 | -1.155225 | -0.029670 | -2.177906 |
| 20 | 1 | 0 | 2.363908  | 0.314984  | -1.629453 |
| 21 | 1 | 0 | -2.766955 | -2.200863 | 0.444673  |
| 22 | 8 | 0 | -1.017300 | -0.324112 | 2.030049  |
| 23 | 1 | 0 | -0.618851 | -0.965931 | 2.640006  |

**C-TS2 (E=-662.478090500)**

|                                              |             |
|----------------------------------------------|-------------|
| Sum of electronic and zero-point Energies=   | -662.298831 |
| Sum of electronic and thermal Energies=      | -662.285703 |
| Sum of electronic and thermal Enthalpies=    | -662.284759 |
| Sum of electronic and thermal Free Energies= | -662.337955 |

|   |   |   |           |           |           |
|---|---|---|-----------|-----------|-----------|
| 1 | 7 | 0 | -1.946328 | -0.706250 | 0.336235  |
| 2 | 6 | 0 | -0.735999 | -1.396019 | -0.038495 |
| 3 | 6 | 0 | 0.512862  | -0.569771 | 0.382042  |
| 4 | 6 | 0 | 0.219532  | 0.851885  | -0.045624 |
| 5 | 7 | 0 | 3.788003  | 0.525478  | -0.284055 |
| 6 | 1 | 0 | 4.325429  | 0.439083  | -1.141178 |
| 7 | 1 | 0 | 4.446790  | 0.594774  | 0.484859  |
| 8 | 7 | 0 | -0.985433 | 1.364509  | -0.157493 |

|    |   |   |           |           |           |
|----|---|---|-----------|-----------|-----------|
| 9  | 6 | 0 | -2.172166 | 0.633380  | 0.022100  |
| 10 | 8 | 0 | -3.272162 | 1.124525  | -0.037769 |
| 11 | 1 | 0 | -0.712239 | -2.349413 | 0.503170  |
| 12 | 6 | 0 | 0.730452  | -0.599717 | 1.903606  |
| 13 | 1 | 0 | -0.152979 | -0.255543 | 2.444421  |
| 14 | 1 | 0 | 0.953969  | -1.626853 | 2.198591  |
| 15 | 1 | 0 | 1.579125  | 0.031035  | 2.175696  |
| 16 | 8 | 0 | 1.590823  | -1.140459 | -0.319615 |
| 17 | 1 | 0 | 2.416105  | -0.588994 | -0.234658 |
| 18 | 8 | 0 | -0.718810 | -1.617936 | -1.433792 |
| 19 | 1 | 0 | 0.211134  | -1.769228 | -1.660215 |
| 20 | 1 | 0 | -2.796208 | -1.252047 | 0.301433  |
| 21 | 1 | 0 | 3.257346  | 1.392489  | -0.333943 |
| 22 | 8 | 0 | 1.057636  | 1.786921  | -0.319458 |
| 23 | 1 | 0 | -0.110154 | 2.355586  | -0.457690 |

**C-PC (E=-662.558184078)**

|                                              |             |
|----------------------------------------------|-------------|
| Sum of electronic and zero-point Energies=   | -662.373505 |
| Sum of electronic and thermal Energies=      | -662.360208 |
| Sum of electronic and thermal Enthalpies=    | -662.359264 |
| Sum of electronic and thermal Free Energies= | -662.412690 |

|   |   |   |          |          |          |
|---|---|---|----------|----------|----------|
| 1 | 7 | 0 | 1.946908 | 0.740244 | 0.348101 |
|---|---|---|----------|----------|----------|

|    |   |   |           |           |           |
|----|---|---|-----------|-----------|-----------|
| 2  | 6 | 0 | 0.708889  | 1.384119  | -0.014887 |
| 3  | 6 | 0 | -0.493692 | 0.499802  | 0.381192  |
| 4  | 6 | 0 | -0.266454 | -0.935086 | -0.145845 |
| 5  | 7 | 0 | -3.874959 | -0.463358 | -0.223820 |
| 6  | 1 | 0 | -3.336188 | -1.316508 | -0.355935 |
| 7  | 1 | 0 | -4.496658 | -0.590397 | 0.567975  |
| 8  | 7 | 0 | 1.047598  | -1.342586 | -0.196514 |
| 9  | 6 | 0 | 2.202848  | -0.571533 | 0.027791  |
| 10 | 8 | 0 | 3.305257  | -1.066508 | -0.025222 |
| 11 | 1 | 0 | 0.645257  | 2.324379  | 0.545647  |
| 12 | 6 | 0 | -0.679464 | 0.436318  | 1.905377  |
| 13 | 1 | 0 | 0.206084  | 0.045225  | 2.410293  |
| 14 | 1 | 0 | -0.886089 | 1.441921  | 2.277924  |
| 15 | 1 | 0 | -1.531093 | -0.202776 | 2.147416  |
| 16 | 8 | 0 | -1.592772 | 1.106272  | -0.254186 |
| 17 | 1 | 0 | -2.422301 | 0.564812  | -0.167051 |
| 18 | 8 | 0 | 0.690228  | 1.633294  | -1.406099 |
| 19 | 1 | 0 | -0.246291 | 1.752930  | -1.626548 |
| 20 | 1 | 0 | 2.780435  | 1.310523  | 0.344291  |
| 21 | 1 | 0 | -4.450500 | -0.322423 | -1.048010 |
| 22 | 8 | 0 | -1.171959 | -1.689375 | -0.443700 |
| 23 | 1 | 0 | 1.221722  | -2.298966 | -0.478483 |

## Water-Mediated Deamination Mechanism

### Path A

wA-RC (E=-738.999681352)

|                                              |             |
|----------------------------------------------|-------------|
| Sum of electronic and zero-point Energies=   | -738.790638 |
| Sum of electronic and thermal Energies=      | -738.774733 |
| Sum of electronic and thermal Enthalpies=    | -738.773788 |
| Sum of electronic and thermal Free Energies= | -738.833102 |

|    |   |   |           |           |           |
|----|---|---|-----------|-----------|-----------|
| 1  | 7 | 0 | -1.434066 | 1.616231  | 0.221638  |
| 2  | 6 | 0 | -2.073538 | 0.473305  | -0.353262 |
| 3  | 6 | 0 | -1.415813 | -0.786520 | 0.244220  |
| 4  | 6 | 0 | 0.101912  | -0.628825 | 0.095684  |
| 5  | 7 | 0 | 0.791984  | -1.754418 | -0.074483 |
| 6  | 1 | 0 | 1.822846  | -1.747413 | -0.129058 |
| 7  | 1 | 0 | 0.275218  | -2.595008 | -0.277221 |
| 8  | 7 | 0 | 0.694630  | 0.527597  | 0.199162  |
| 9  | 6 | 0 | -0.042246 | 1.705882  | 0.314689  |
| 10 | 8 | 0 | 0.497976  | 2.776582  | 0.506041  |
| 11 | 1 | 0 | -3.136151 | 0.491293  | -0.071112 |
| 12 | 6 | 0 | -1.779838 | -0.985480 | 1.718305  |
| 13 | 1 | 0 | -1.489982 | -0.119813 | 2.313076  |
| 14 | 1 | 0 | -2.862863 | -1.116061 | 1.821108  |

|    |   |   |           |           |           |
|----|---|---|-----------|-----------|-----------|
| 15 | 1 | 0 | -1.278086 | -1.870681 | 2.113496  |
| 16 | 8 | 0 | -1.807506 | -1.930266 | -0.532633 |
| 17 | 1 | 0 | -2.625965 | -2.281076 | -0.164755 |
| 18 | 8 | 0 | -1.948846 | 0.480883  | -1.765400 |
| 19 | 1 | 0 | -2.082100 | -0.429234 | -2.062325 |
| 20 | 1 | 0 | -1.877315 | 2.514116  | 0.088231  |
| 21 | 1 | 0 | 2.445966  | 0.963700  | -0.229124 |
| 22 | 8 | 0 | 3.407508  | 1.011358  | -0.436102 |
| 23 | 1 | 0 | 3.742928  | 1.720391  | 0.119852  |
| 24 | 8 | 0 | 3.631630  | -1.648474 | -0.095338 |
| 25 | 1 | 0 | 3.966040  | -1.761973 | 0.799581  |
| 26 | 1 | 0 | 3.742670  | -0.684952 | -0.276325 |

**wA-TS1 (E=-738.973897974)**

Sum of electronic and zero-point Energies= -738.773202

Sum of electronic and thermal Energies= -738.759262

Sum of electronic and thermal Enthalpies= -738.758318

Sum of electronic and thermal Free Energies= -738.813215

|   |   |   |           |           |           |
|---|---|---|-----------|-----------|-----------|
| 1 | 7 | 0 | -1.462044 | 1.576643  | 0.197851  |
| 2 | 6 | 0 | -2.041052 | 0.385635  | -0.343374 |
| 3 | 6 | 0 | -1.311804 | -0.824390 | 0.273129  |

|    |   |   |           |           |           |
|----|---|---|-----------|-----------|-----------|
| 4  | 6 | 0 | 0.198692  | -0.629106 | 0.078063  |
| 5  | 7 | 0 | 0.957919  | -1.672602 | -0.109339 |
| 6  | 1 | 0 | 2.254077  | -1.632142 | -0.154900 |
| 7  | 1 | 0 | 0.426547  | -2.528045 | -0.221125 |
| 8  | 7 | 0 | 0.706304  | 0.605598  | 0.173198  |
| 9  | 6 | 0 | -0.078924 | 1.748708  | 0.258109  |
| 10 | 8 | 0 | 0.412521  | 2.850425  | 0.404041  |
| 11 | 1 | 0 | -3.100159 | 0.353325  | -0.049446 |
| 12 | 6 | 0 | -1.626502 | -0.989789 | 1.763004  |
| 13 | 1 | 0 | -1.335568 | -0.104272 | 2.327106  |
| 14 | 1 | 0 | -2.702459 | -1.139448 | 1.905705  |
| 15 | 1 | 0 | -1.093296 | -1.854683 | 2.162291  |
| 16 | 8 | 0 | -1.683316 | -2.003172 | -0.455803 |
| 17 | 1 | 0 | -2.474653 | -2.373559 | -0.050248 |
| 18 | 8 | 0 | -1.930566 | 0.366727  | -1.756488 |
| 19 | 1 | 0 | -2.017399 | -0.556611 | -2.029432 |
| 20 | 1 | 0 | -1.955008 | 2.445295  | 0.047382  |
| 21 | 1 | 0 | 1.993038  | 0.840944  | -0.074434 |
| 22 | 8 | 0 | 3.129071  | 0.909299  | -0.336420 |
| 23 | 1 | 0 | 3.561955  | 1.490929  | 0.295751  |
| 24 | 8 | 0 | 3.439020  | -1.457968 | -0.177636 |
| 25 | 1 | 0 | 3.812337  | -1.748815 | 0.660251  |

|    |   |   |          |           |           |
|----|---|---|----------|-----------|-----------|
| 26 | 1 | 0 | 3.439043 | -0.229225 | -0.246006 |
|----|---|---|----------|-----------|-----------|

**wA-IM1 (E=-738.995538276)**

Sum of electronic and zero-point Energies= -738.785872

Sum of electronic and thermal Energies= -738.769869

Sum of electronic and thermal Enthalpies= -738.768924

Sum of electronic and thermal Free Energies= -738.827917

|    |   |   |           |           |           |
|----|---|---|-----------|-----------|-----------|
| 1  | 7 | 0 | -0.870678 | 1.733456  | 0.211956  |
| 2  | 6 | 0 | -1.878107 | 0.715966  | 0.135368  |
| 3  | 6 | 0 | -1.228343 | -0.653767 | 0.431520  |
| 4  | 6 | 0 | -0.021916 | -0.851378 | -0.486296 |
| 5  | 7 | 0 | 0.408940  | -1.982220 | -0.893267 |
| 6  | 1 | 0 | 2.941670  | -0.231941 | 0.938006  |
| 7  | 1 | 0 | -0.229221 | -2.720966 | -0.605824 |
| 8  | 7 | 0 | 0.675418  | 0.298940  | -0.778279 |
| 9  | 6 | 0 | 0.377823  | 1.586138  | -0.345823 |
| 10 | 8 | 0 | 1.183338  | 2.491355  | -0.441680 |
| 11 | 1 | 0 | -2.626665 | 0.925917  | 0.911450  |
| 12 | 6 | 0 | -0.754921 | -0.775830 | 1.885552  |
| 13 | 1 | 0 | 0.126747  | -0.160963 | 2.075019  |
| 14 | 1 | 0 | -1.553525 | -0.482316 | 2.574835  |



|    |   |   |           |           |           |
|----|---|---|-----------|-----------|-----------|
| 15 | 1 | 0 | -0.477079 | -1.813908 | 2.082404  |
| 16 | 8 | 0 | -2.175236 | -1.676392 | 0.099605  |
| 17 | 1 | 0 | -2.669276 | -1.898737 | 0.895814  |
| 18 | 8 | 0 | -2.485041 | 0.712805  | -1.143042 |
| 19 | 1 | 0 | -2.904407 | -0.153035 | -1.242439 |
| 20 | 1 | 0 | -1.146170 | 2.691616  | 0.363265  |
| 21 | 1 | 0 | 1.616898  | 0.172645  | -1.141942 |
| 22 | 8 | 0 | 2.606657  | 0.358282  | 1.631290  |
| 23 | 1 | 0 | 2.607000  | 1.226125  | 1.210723  |
| 24 | 1 | 0 | 2.309003  | -1.801903 | -0.939280 |
| 25 | 8 | 0 | 3.089449  | -1.221593 | -0.802554 |
| 26 | 1 | 0 | 3.788715  | -1.546185 | -1.375776 |

**wA-TS2 (E=-738.944914904)**

Sum of electronic and zero-point Energies= -738.738182

Sum of electronic and thermal Energies= -738.724082

Sum of electronic and thermal Enthalpies= -738.723138

Sum of electronic and thermal Free Energies= -738.777269

|   |   |   |           |           |          |
|---|---|---|-----------|-----------|----------|
| 1 | 7 | 0 | -1.522116 | 1.358582  | 0.473274 |
| 2 | 6 | 0 | -1.953025 | 0.069700  | 0.009982 |
| 3 | 6 | 0 | -0.824978 | -0.962326 | 0.273398 |

|    |   |   |           |           |           |
|----|---|---|-----------|-----------|-----------|
| 4  | 6 | 0 | 0.449898  | -0.401575 | -0.360389 |
| 5  | 7 | 0 | 1.078692  | -1.110785 | -1.281590 |
| 6  | 1 | 0 | 2.877262  | -0.262835 | 0.264907  |
| 7  | 1 | 0 | 0.929557  | -2.107890 | -1.230251 |
| 8  | 7 | 0 | 0.645408  | 0.937937  | -0.295384 |
| 9  | 6 | 0 | -0.275947 | 1.877883  | 0.172073  |
| 10 | 8 | 0 | 0.012969  | 3.044322  | 0.301846  |
| 11 | 1 | 0 | -2.829135 | -0.226560 | 0.600760  |
| 12 | 6 | 0 | -0.674530 | -1.253359 | 1.765280  |
| 13 | 1 | 0 | -0.532238 | -0.331275 | 2.327287  |
| 14 | 1 | 0 | -1.592968 | -1.730826 | 2.126829  |
| 15 | 1 | 0 | 0.200831  | -1.880625 | 1.923613  |
| 16 | 8 | 0 | -1.157851 | -2.155939 | -0.447408 |
| 17 | 1 | 0 | -1.425573 | -2.825489 | 0.189482  |
| 18 | 8 | 0 | -2.278827 | 0.126161  | -1.364474 |
| 19 | 1 | 0 | -2.315078 | -0.787662 | -1.678555 |
| 20 | 1 | 0 | -2.224370 | 2.071673  | 0.605046  |
| 21 | 1 | 0 | 1.601561  | 1.254334  | -0.511279 |
| 22 | 8 | 0 | 2.103383  | -0.917227 | 1.149117  |
| 23 | 1 | 0 | 2.121209  | -0.401479 | 1.963454  |
| 24 | 1 | 0 | 2.024540  | -0.768077 | -1.507483 |
| 25 | 8 | 0 | 3.226762  | 0.307817  | -0.628615 |

|    |   |   |          |          |           |
|----|---|---|----------|----------|-----------|
| 26 | 1 | 0 | 4.170504 | 0.473561 | -0.593709 |
|----|---|---|----------|----------|-----------|

**wA-IM2 (E=-738.995487236)**

Sum of electronic and zero-point Energies= -738.782362

Sum of electronic and thermal Energies= -738.767971

Sum of electronic and thermal Enthalpies= -738.767027

Sum of electronic and thermal Free Energies= -738.821811

|    |   |   |           |           |           |
|----|---|---|-----------|-----------|-----------|
| 1  | 7 | 0 | -1.258245 | 1.619099  | 0.125130  |
| 2  | 6 | 0 | -1.809255 | 0.350809  | -0.281380 |
| 3  | 6 | 0 | -1.009490 | -0.813066 | 0.363276  |
| 4  | 6 | 0 | 0.506066  | -0.583885 | 0.045924  |
| 5  | 7 | 0 | 0.725484  | -0.799544 | -1.372135 |
| 6  | 1 | 0 | 3.183987  | -0.961877 | 0.097209  |
| 7  | 1 | 0 | 0.576269  | -1.784495 | -1.574434 |
| 8  | 7 | 0 | 0.891122  | 0.754627  | 0.442847  |
| 9  | 6 | 0 | 0.092907  | 1.879399  | 0.279397  |
| 10 | 8 | 0 | 0.540469  | 3.007140  | 0.334124  |
| 11 | 1 | 0 | -2.842852 | 0.295939  | 0.066195  |
| 12 | 6 | 0 | -1.270587 | -0.915347 | 1.863426  |
| 13 | 1 | 0 | -0.864179 | -0.062407 | 2.409124  |
| 14 | 1 | 0 | -2.345960 | -0.965644 | 2.042195  |

|    |   |   |           |           |           |
|----|---|---|-----------|-----------|-----------|
| 15 | 1 | 0 | -0.834884 | -1.840723 | 2.246121  |
| 16 | 8 | 0 | -1.436059 | -2.028970 | -0.232662 |
| 17 | 1 | 0 | -1.829831 | -1.785114 | -1.083672 |
| 18 | 8 | 0 | -1.892024 | 0.176300  | -1.690619 |
| 19 | 1 | 0 | -0.969642 | 0.081841  | -2.002928 |
| 20 | 1 | 0 | -1.789815 | 2.446559  | -0.103393 |
| 21 | 1 | 0 | 1.881762  | 0.949999  | 0.328215  |
| 22 | 8 | 0 | 1.347382  | -1.504917 | 0.761689  |
| 23 | 1 | 0 | 1.245784  | -1.322529 | 1.704146  |
| 24 | 1 | 0 | 1.688716  | -0.562282 | -1.601553 |
| 25 | 8 | 0 | 3.544472  | -0.242797 | -0.444128 |
| 26 | 1 | 0 | 4.500349  | -0.270055 | -0.349203 |

**wA-TS3 (E=-738.974479459)**

Sum of electronic and zero-point Energies= -738.763752

Sum of electronic and thermal Energies= -738.748966

Sum of electronic and thermal Enthalpies= -738.748022

Sum of electronic and thermal Free Energies= -738.804200

|   |   |   |           |           |           |
|---|---|---|-----------|-----------|-----------|
| 1 | 7 | 0 | -1.095879 | 1.699122  | 0.219638  |
| 2 | 6 | 0 | -1.821476 | 0.506004  | -0.057628 |
| 3 | 6 | 0 | -1.042305 | -0.743434 | 0.419958  |

|    |   |   |           |           |           |
|----|---|---|-----------|-----------|-----------|
| 4  | 6 | 0 | 0.430178  | -0.685573 | -0.138695 |
| 5  | 7 | 0 | 0.533775  | -0.995821 | -1.554455 |
| 6  | 1 | 0 | 3.228967  | -1.073982 | -0.198450 |
| 7  | 1 | 0 | -0.377933 | -1.033348 | -1.989917 |
| 8  | 7 | 0 | 0.984753  | 0.628558  | 0.182254  |
| 9  | 6 | 0 | 0.293798  | 1.819037  | 0.202499  |
| 10 | 8 | 0 | 0.832553  | 2.906624  | 0.249049  |
| 11 | 1 | 0 | -2.782041 | 0.522955  | 0.461449  |
| 12 | 6 | 0 | -1.056169 | -0.829119 | 1.946086  |
| 13 | 1 | 0 | -0.475461 | -0.029878 | 2.408648  |
| 14 | 1 | 0 | -2.085147 | -0.768153 | 2.304898  |
| 15 | 1 | 0 | -0.660552 | -1.798541 | 2.253484  |
| 16 | 8 | 0 | -1.710805 | -1.897758 | -0.053748 |
| 17 | 1 | 0 | -2.102265 | -1.670264 | -0.906948 |
| 18 | 8 | 0 | -2.172360 | 0.362284  | -1.455859 |
| 19 | 1 | 0 | -1.540422 | 0.879684  | -1.969063 |
| 20 | 1 | 0 | -1.579156 | 2.584697  | 0.217466  |
| 21 | 1 | 0 | 1.969181  | 0.728294  | -0.065756 |
| 22 | 8 | 0 | 1.269641  | -1.652835 | 0.491322  |
| 23 | 1 | 0 | 1.384478  | -1.376357 | 1.407665  |
| 24 | 1 | 0 | 0.961253  | -1.908303 | -1.660868 |
| 25 | 8 | 0 | 3.770920  | -0.284958 | -0.337396 |

|    |   |   |          |           |          |
|----|---|---|----------|-----------|----------|
| 26 | 1 | 0 | 4.356810 | -0.248155 | 0.425067 |
|----|---|---|----------|-----------|----------|

**wA-IM3 (E=-738.986315642)**

Sum of electronic and zero-point Energies= -738.773881

Sum of electronic and thermal Energies= -738.759228

Sum of electronic and thermal Enthalpies= -738.758284

Sum of electronic and thermal Free Energies= -738.813680

|    |   |   |           |           |           |
|----|---|---|-----------|-----------|-----------|
| 1  | 7 | 0 | 1.141965  | 1.682599  | -0.165191 |
| 2  | 6 | 0 | 1.740744  | 0.488559  | 0.333103  |
| 3  | 6 | 0 | 1.085257  | -0.750770 | -0.308227 |
| 4  | 6 | 0 | -0.484698 | -0.676305 | -0.107495 |
| 5  | 7 | 0 | -0.934898 | -1.106704 | 1.212757  |
| 6  | 1 | 0 | -2.871289 | -0.661735 | 0.988513  |
| 7  | 1 | 0 | -0.441503 | -0.577373 | 1.925641  |
| 8  | 7 | 0 | -0.955515 | 0.669576  | -0.375624 |
| 9  | 6 | 0 | -0.237621 | 1.842994  | -0.304072 |
| 10 | 8 | 0 | -0.741552 | 2.942276  | -0.404256 |
| 11 | 1 | 0 | 2.806475  | 0.495945  | 0.085700  |
| 12 | 6 | 0 | 1.462228  | -0.844209 | -1.785148 |
| 13 | 1 | 0 | 1.024482  | -0.033621 | -2.370126 |
| 14 | 1 | 0 | 2.547944  | -0.802575 | -1.892248 |

|    |   |   |           |           |           |
|----|---|---|-----------|-----------|-----------|
| 15 | 1 | 0 | 1.125626  | -1.804331 | -2.176421 |
| 16 | 8 | 0 | 1.593945  | -1.918494 | 0.315219  |
| 17 | 1 | 0 | 1.729072  | -1.698815 | 1.245955  |
| 18 | 8 | 0 | 1.602903  | 0.311401  | 1.763509  |
| 19 | 1 | 0 | 2.114650  | 0.990079  | 2.215115  |
| 20 | 1 | 0 | 1.628998  | 2.560664  | -0.064317 |
| 21 | 1 | 0 | -1.965008 | 0.774682  | -0.261574 |
| 22 | 8 | 0 | -1.141350 | -1.581610 | -0.978605 |
| 23 | 1 | 0 | -1.086737 | -1.217247 | -1.868271 |
| 24 | 1 | 0 | -0.702614 | -2.089485 | 1.325835  |
| 25 | 8 | 0 | -3.606194 | -0.267527 | 0.479866  |
| 26 | 1 | 0 | -3.728430 | -0.904473 | -0.232225 |

**wA-TS4 (E=-738.984351555)**

Sum of electronic and zero-point Energies= -738.772706

Sum of electronic and thermal Energies= -738.758462

Sum of electronic and thermal Enthalpies= -738.757518

Sum of electronic and thermal Free Energies= -738.812266

|   |   |   |          |           |           |
|---|---|---|----------|-----------|-----------|
| 1 | 7 | 0 | 1.123790 | 1.694026  | -0.141333 |
| 2 | 6 | 0 | 1.727066 | 0.504499  | 0.364487  |
| 3 | 6 | 0 | 1.105507 | -0.737493 | -0.302920 |

|    |   |   |           |           |           |
|----|---|---|-----------|-----------|-----------|
| 4  | 6 | 0 | -0.467239 | -0.686397 | -0.139954 |
| 5  | 7 | 0 | -0.944975 | -1.140451 | 1.171782  |
| 6  | 1 | 0 | -2.831442 | -0.738657 | 0.942839  |
| 7  | 1 | 0 | -0.466668 | -0.625619 | 1.907128  |
| 8  | 7 | 0 | -0.957257 | 0.655360  | -0.385818 |
| 9  | 6 | 0 | -0.251069 | 1.837494  | -0.310229 |
| 10 | 8 | 0 | -0.770900 | 2.928762  | -0.419680 |
| 11 | 1 | 0 | 2.797952  | 0.528513  | 0.142920  |
| 12 | 6 | 0 | 1.513544  | -0.811263 | -1.771063 |
| 13 | 1 | 0 | 1.084624  | 0.006934  | -2.350025 |
| 14 | 1 | 0 | 2.602376  | -0.771215 | -1.850499 |
| 15 | 1 | 0 | 1.165308  | -1.755385 | -2.184465 |
| 16 | 8 | 0 | 1.613808  | -1.903697 | 0.327243  |
| 17 | 1 | 0 | 1.724149  | -1.687633 | 1.261993  |
| 18 | 8 | 0 | 1.556216  | 0.319540  | 1.790511  |
| 19 | 1 | 0 | 2.049766  | 1.001560  | 2.256963  |
| 20 | 1 | 0 | 1.601726  | 2.576882  | -0.040711 |
| 21 | 1 | 0 | -1.965193 | 0.759749  | -0.266566 |
| 22 | 8 | 0 | -1.033380 | -1.589885 | -1.074803 |
| 23 | 1 | 0 | -1.668462 | -1.095147 | -1.600998 |
| 24 | 1 | 0 | -0.709375 | -2.124338 | 1.267002  |
| 25 | 8 | 0 | -3.567757 | -0.279643 | 0.486729  |



|    |   |   |           |           |          |
|----|---|---|-----------|-----------|----------|
| 26 | 1 | 0 | -4.086412 | -0.979840 | 0.080077 |
|----|---|---|-----------|-----------|----------|

**wA-IM4 (E=-738.995002143)**

Sum of electronic and zero-point Energies= -738.782021

Sum of electronic and thermal Energies= -738.767719

Sum of electronic and thermal Enthalpies= -738.766775

Sum of electronic and thermal Free Energies= -738.821356

|    |   |   |           |           |           |
|----|---|---|-----------|-----------|-----------|
| 1  | 7 | 0 | -1.538719 | 1.375901  | 0.055550  |
| 2  | 6 | 0 | -1.826363 | 0.028238  | -0.319570 |
| 3  | 6 | 0 | -0.829760 | -0.927428 | 0.368245  |
| 4  | 6 | 0 | 0.629757  | -0.448182 | 0.091626  |
| 5  | 7 | 0 | 1.071891  | -0.600877 | -1.310268 |
| 6  | 1 | 0 | 2.903413  | -0.071589 | -1.031599 |
| 7  | 1 | 0 | 0.455489  | -0.060752 | -1.913774 |
| 8  | 7 | 0 | 0.725787  | 0.951622  | 0.464058  |
| 9  | 6 | 0 | -0.264973 | 1.893610  | 0.265168  |
| 10 | 8 | 0 | -0.061800 | 3.089894  | 0.329490  |
| 11 | 1 | 0 | -2.835881 | -0.226189 | 0.024407  |
| 12 | 6 | 0 | -1.125056 | -1.027311 | 1.865362  |
| 13 | 1 | 0 | -1.021114 | -0.061192 | 2.358836  |
| 14 | 1 | 0 | -2.145413 | -1.391242 | 2.007742  |

|    |   |   |           |           |           |
|----|---|---|-----------|-----------|-----------|
| 15 | 1 | 0 | -0.428135 | -1.720428 | 2.336973  |
| 16 | 8 | 0 | -1.032591 | -2.193983 | -0.266416 |
| 17 | 1 | 0 | -0.481657 | -2.834733 | 0.197949  |
| 18 | 8 | 0 | -1.787573 | -0.093441 | -1.746572 |
| 19 | 1 | 0 | -1.905742 | -1.033421 | -1.938778 |
| 20 | 1 | 0 | -2.212050 | 2.084999  | -0.192754 |
| 21 | 1 | 0 | 1.662238  | 1.338198  | 0.474896  |
| 22 | 8 | 0 | 1.461919  | -1.254834 | 0.879612  |
| 23 | 1 | 0 | 2.381328  | -0.985116 | 0.691285  |
| 24 | 1 | 0 | 0.942924  | -1.575000 | -1.572481 |
| 25 | 8 | 0 | 3.538001  | 0.117627  | -0.305743 |
| 26 | 1 | 0 | 4.426601  | 0.014278  | -0.656028 |

**wA-TS5 (E=-738.967232373)**

Sum of electronic and zero-point Energies= -738.760302

Sum of electronic and thermal Energies= -738.747112

Sum of electronic and thermal Enthalpies= -738.746168

Sum of electronic and thermal Free Energies= -738.798959

|   |   |   |           |           |           |
|---|---|---|-----------|-----------|-----------|
| 1 | 7 | 0 | -1.941427 | 0.737482  | -0.079064 |
| 2 | 6 | 0 | -1.669164 | -0.633925 | -0.367297 |
| 3 | 6 | 0 | -0.427766 | -1.093968 | 0.422492  |

|    |   |   |           |           |           |
|----|---|---|-----------|-----------|-----------|
| 4  | 6 | 0 | 0.747149  | -0.099027 | 0.220256  |
| 5  | 7 | 0 | 1.228455  | -0.149378 | -1.273350 |
| 6  | 1 | 0 | 2.267674  | 0.380597  | -1.164144 |
| 7  | 1 | 0 | 0.543870  | 0.257098  | -1.907467 |
| 8  | 7 | 0 | 0.274021  | 1.248685  | 0.456881  |
| 9  | 6 | 0 | -0.995724 | 1.721184  | 0.195863  |
| 10 | 8 | 0 | -1.292926 | 2.897423  | 0.248631  |
| 11 | 1 | 0 | -2.526685 | -1.239684 | -0.052222 |
| 12 | 6 | 0 | -0.745768 | -1.246735 | 1.909338  |
| 13 | 1 | 0 | -1.116317 | -0.315167 | 2.337210  |
| 14 | 1 | 0 | -1.502654 | -2.023751 | 2.037901  |
| 15 | 1 | 0 | 0.160385  | -1.527503 | 2.447076  |
| 16 | 8 | 0 | -0.050093 | -2.354661 | -0.141616 |
| 17 | 1 | 0 | 0.704781  | -2.663445 | 0.376222  |
| 18 | 8 | 0 | -1.492592 | -0.797341 | -1.782791 |
| 19 | 1 | 0 | -1.311786 | -1.735527 | -1.927419 |
| 20 | 1 | 0 | -2.831075 | 1.115445  | -0.367033 |
| 21 | 1 | 0 | 0.978038  | 1.953929  | 0.628399  |
| 22 | 8 | 0 | 1.815161  | -0.445037 | 0.957722  |
| 23 | 1 | 0 | 2.698183  | 0.166271  | 0.478391  |
| 24 | 1 | 0 | 1.339399  | -1.130790 | -1.520338 |
| 25 | 8 | 0 | 3.274902  | 0.875262  | -0.383658 |

|    |   |   |          |          |           |
|----|---|---|----------|----------|-----------|
| 26 | 1 | 0 | 4.180874 | 0.614671 | -0.568069 |
|----|---|---|----------|----------|-----------|

**wA-PC (E=-739.020891776)**

Sum of electronic and zero-point Energies= -738.810874

Sum of electronic and thermal Energies= -738.794786

Sum of electronic and thermal Enthalpies= -738.793842

Sum of electronic and thermal Free Energies= -738.853397

|    |   |   |           |           |           |
|----|---|---|-----------|-----------|-----------|
| 1  | 7 | 0 | 1.130502  | 1.644059  | 0.205937  |
| 2  | 6 | 0 | 1.537113  | 0.372865  | 0.828801  |
| 3  | 6 | 0 | 1.313176  | -0.740575 | -0.230497 |
| 4  | 6 | 0 | -0.127454 | -0.654826 | -0.736556 |
| 5  | 7 | 0 | -1.859018 | -0.391868 | 2.094288  |
| 6  | 1 | 0 | -2.461564 | -0.426206 | 1.270856  |
| 7  | 1 | 0 | -2.238839 | 0.318934  | 2.713107  |
| 8  | 7 | 0 | -0.634396 | 0.595141  | -0.915804 |
| 9  | 6 | 0 | -0.059856 | 1.804701  | -0.447408 |
| 10 | 8 | 0 | -0.613404 | 2.861638  | -0.650107 |
| 11 | 1 | 0 | 2.609491  | 0.444356  | 1.021793  |
| 12 | 6 | 0 | 2.274597  | -0.579772 | -1.425245 |
| 13 | 1 | 0 | 2.189659  | 0.394685  | -1.907657 |
| 14 | 1 | 0 | 3.296487  | -0.710659 | -1.063256 |

|    |   |   |           |           |           |
|----|---|---|-----------|-----------|-----------|
| 15 | 1 | 0 | 2.071552  | -1.362871 | -2.158709 |
| 16 | 8 | 0 | 1.510397  | -1.996913 | 0.371799  |
| 17 | 1 | 0 | 0.810073  | -2.570428 | 0.027951  |
| 18 | 8 | 0 | 0.935393  | 0.145267  | 2.056977  |
| 19 | 1 | 0 | -0.028451 | -0.054208 | 1.965407  |
| 20 | 1 | 0 | 1.435986  | 2.489777  | 0.667005  |
| 21 | 1 | 0 | -1.610349 | 0.664352  | -1.198643 |
| 22 | 8 | 0 | -0.764134 | -1.678693 | -0.974081 |
| 23 | 1 | 0 | -2.607939 | -1.264827 | -0.970236 |
| 24 | 1 | 0 | -1.954744 | -1.282103 | 2.574664  |
| 25 | 8 | 0 | -3.256525 | -0.577031 | -0.732584 |
| 26 | 1 | 0 | -4.090250 | -0.820635 | -1.143848 |

### Path B

#### wB-RC (E=-738.991536723)

|                                              |             |
|----------------------------------------------|-------------|
| Sum of electronic and zero-point Energies=   | -738.783042 |
| Sum of electronic and thermal Energies=      | -738.766620 |
| Sum of electronic and thermal Enthalpies=    | -738.765676 |
| Sum of electronic and thermal Free Energies= | -738.825922 |

|   |   |   |           |           |          |
|---|---|---|-----------|-----------|----------|
| 1 | 7 | 0 | -1.515161 | 1.341805  | 0.665351 |
| 2 | 6 | 0 | -2.076614 | 0.100552  | 0.230598 |
| 3 | 6 | 0 | -0.948766 | -0.951436 | 0.211179 |

|    |   |   |           |           |           |
|----|---|---|-----------|-----------|-----------|
| 4  | 6 | 0 | 0.216049  | -0.342126 | -0.561979 |
| 5  | 7 | 0 | 0.927042  | -1.173851 | -1.325434 |
| 6  | 1 | 0 | 1.822641  | -0.854990 | -1.679463 |
| 7  | 1 | 0 | 0.683169  | -2.149897 | -1.339728 |
| 8  | 7 | 0 | 0.549769  | 0.911163  | -0.449948 |
| 9  | 6 | 0 | -0.274738 | 1.811283  | 0.228801  |
| 10 | 8 | 0 | 0.067553  | 2.954275  | 0.447542  |
| 11 | 1 | 0 | -2.842230 | -0.208012 | 0.956800  |
| 12 | 6 | 0 | -0.479013 | -1.335342 | 1.619331  |
| 13 | 1 | 0 | -0.286352 | -0.442399 | 2.213436  |
| 14 | 1 | 0 | -1.263657 | -1.911033 | 2.123553  |
| 15 | 1 | 0 | 0.442621  | -1.917160 | 1.575122  |
| 16 | 8 | 0 | -1.398057 | -2.107134 | -0.513799 |
| 17 | 1 | 0 | -1.779431 | -2.726479 | 0.117551  |
| 18 | 8 | 0 | -2.656122 | 0.231083  | -1.057689 |
| 19 | 1 | 0 | -2.721873 | -0.662000 | -1.421874 |
| 20 | 1 | 0 | -2.146672 | 2.076556  | 0.948590  |
| 21 | 1 | 0 | 2.331060  | 1.028004  | -0.810023 |
| 22 | 8 | 0 | 3.190285  | 0.572179  | -0.992363 |
| 23 | 1 | 0 | 3.805904  | 1.237495  | -1.310728 |
| 24 | 1 | 0 | 3.216812  | -0.581938 | 0.521796  |
| 25 | 8 | 0 | 2.972588  | -1.109525 | 1.302534  |

|    |   |   |          |           |          |
|----|---|---|----------|-----------|----------|
| 26 | 1 | 0 | 2.974968 | -0.466587 | 2.017802 |
|----|---|---|----------|-----------|----------|

**wB-TS1 (E=-738.942193997)**

Sum of electronic and zero-point Energies= -738.735508

Sum of electronic and thermal Energies= -738.721399

Sum of electronic and thermal Enthalpies= -738.720455

Sum of electronic and thermal Free Energies= -738.774702

|    |   |   |           |           |           |
|----|---|---|-----------|-----------|-----------|
| 1  | 7 | 0 | -1.334486 | 1.474793  | 0.525752  |
| 2  | 6 | 0 | -1.924954 | 0.260479  | 0.043235  |
| 3  | 6 | 0 | -0.921991 | -0.902889 | 0.262470  |
| 4  | 6 | 0 | 0.405910  | -0.485953 | -0.378432 |
| 5  | 7 | 0 | 0.989901  | -1.303725 | -1.246144 |
| 6  | 1 | 0 | 1.963941  | -1.063968 | -1.473905 |
| 7  | 1 | 0 | 0.727647  | -2.275091 | -1.178408 |
| 8  | 7 | 0 | 0.705549  | 0.830462  | -0.411590 |
| 9  | 6 | 0 | -0.062729 | 1.859257  | 0.142271  |
| 10 | 8 | 0 | 0.363056  | 2.983648  | 0.253435  |
| 11 | 1 | 0 | -2.818966 | 0.055879  | 0.645815  |
| 12 | 6 | 0 | -0.792229 | -1.251874 | 1.744401  |
| 13 | 1 | 0 | -0.222691 | -0.498861 | 2.280925  |
| 14 | 1 | 0 | -1.793297 | -1.359455 | 2.177906  |

|    |   |   |           |           |           |
|----|---|---|-----------|-----------|-----------|
| 15 | 1 | 0 | -0.247576 | -2.190866 | 1.847179  |
| 16 | 8 | 0 | -1.398491 | -2.034417 | -0.485126 |
| 17 | 1 | 0 | -1.883857 | -2.604288 | 0.120373  |
| 18 | 8 | 0 | -2.270329 | 0.385499  | -1.322430 |
| 19 | 1 | 0 | -2.380958 | -0.512220 | -1.664168 |
| 20 | 1 | 0 | -1.944549 | 2.257166  | 0.712231  |
| 21 | 1 | 0 | 1.692277  | 1.037675  | -0.631309 |
| 22 | 8 | 0 | 3.241677  | -0.007900 | -0.635742 |
| 23 | 1 | 0 | 4.139913  | 0.311352  | -0.531152 |
| 24 | 1 | 0 | 2.809788  | -0.336332 | 0.338698  |
| 25 | 8 | 0 | 1.944417  | -0.713170 | 1.295042  |
| 26 | 1 | 0 | 2.164898  | -1.615103 | 1.554595  |

**wB-IM1 (E=-738.995652891)**

|                                              |             |
|----------------------------------------------|-------------|
| Sum of electronic and zero-point Energies=   | -738.782615 |
| Sum of electronic and thermal Energies=      | -738.768171 |
| Sum of electronic and thermal Enthalpies=    | -738.767227 |
| Sum of electronic and thermal Free Energies= | -738.822325 |

|   |   |   |           |           |           |
|---|---|---|-----------|-----------|-----------|
| 1 | 7 | 0 | -1.201892 | 1.637276  | 0.105485  |
| 2 | 6 | 0 | -1.820781 | 0.379530  | -0.228838 |
| 3 | 6 | 0 | -1.003780 | -0.778184 | 0.398434  |



|    |   |   |           |           |           |
|----|---|---|-----------|-----------|-----------|
| 4  | 6 | 0 | 0.490226  | -0.573441 | 0.015561  |
| 5  | 7 | 0 | 0.642595  | -0.699111 | -1.438419 |
| 6  | 1 | 0 | 1.602329  | -0.465030 | -1.684579 |
| 7  | 1 | 0 | 0.467153  | -1.658518 | -1.724160 |
| 8  | 7 | 0 | 0.928078  | 0.724315  | 0.449686  |
| 9  | 6 | 0 | 0.156062  | 1.862919  | 0.273706  |
| 10 | 8 | 0 | 0.625323  | 2.982343  | 0.323814  |
| 11 | 1 | 0 | -2.831240 | 0.362445  | 0.184825  |
| 12 | 6 | 0 | -1.208886 | -0.850890 | 1.908078  |
| 13 | 1 | 0 | -0.859976 | 0.055396  | 2.402049  |
| 14 | 1 | 0 | -2.271889 | -0.989313 | 2.115054  |
| 15 | 1 | 0 | -0.664083 | -1.698297 | 2.323401  |
| 16 | 8 | 0 | -1.430096 | -2.016937 | -0.168083 |
| 17 | 1 | 0 | -1.872764 | -1.788978 | -1.000408 |
| 18 | 8 | 0 | -2.001181 | 0.172029  | -1.624713 |
| 19 | 1 | 0 | -1.098187 | 0.130223  | -1.997325 |
| 20 | 1 | 0 | -1.716252 | 2.480508  | -0.101588 |
| 21 | 1 | 0 | 1.924345  | 0.889061  | 0.342244  |
| 22 | 8 | 0 | 3.558598  | -0.323517 | -0.429720 |
| 23 | 1 | 0 | 4.440972  | -0.156905 | -0.086713 |
| 24 | 1 | 0 | 3.154411  | -0.985627 | 0.152227  |
| 25 | 8 | 0 | 1.314398  | -1.521438 | 0.712759  |

|    |   |   |          |           |          |
|----|---|---|----------|-----------|----------|
| 26 | 1 | 0 | 0.930327 | -2.391775 | 0.543595 |
|----|---|---|----------|-----------|----------|

**wB-TS2 (E=-738.976371863)**

Sum of electronic and zero-point Energies= -738.766176

Sum of electronic and thermal Energies= -738.751220

Sum of electronic and thermal Enthalpies= -738.750275

Sum of electronic and thermal Free Energies= -738.806859

|    |   |   |           |           |           |
|----|---|---|-----------|-----------|-----------|
| 1  | 7 | 0 | -1.064703 | 1.688060  | 0.156256  |
| 2  | 6 | 0 | -1.832179 | 0.482681  | 0.130934  |
| 3  | 6 | 0 | -0.950267 | -0.726363 | 0.503287  |
| 4  | 6 | 0 | 0.404012  | -0.629950 | -0.283059 |
| 5  | 7 | 0 | 0.261481  | -0.777623 | -1.724798 |
| 6  | 1 | 0 | 0.685350  | -1.629750 | -2.062011 |
| 7  | 1 | 0 | -0.690834 | -0.678274 | -2.047051 |
| 8  | 7 | 0 | 1.027546  | 0.629899  | 0.073794  |
| 9  | 6 | 0 | 0.332887  | 1.810640  | 0.119510  |
| 10 | 8 | 0 | 0.854652  | 2.906169  | 0.171117  |
| 11 | 1 | 0 | -2.661322 | 0.556980  | 0.840904  |
| 12 | 6 | 0 | -0.732894 | -0.770786 | 2.014889  |
| 13 | 1 | 0 | -0.244763 | 0.132083  | 2.378924  |
| 14 | 1 | 0 | -1.700557 | -0.885507 | 2.507333  |

|    |   |   |           |           |           |
|----|---|---|-----------|-----------|-----------|
| 15 | 1 | 0 | -0.109315 | -1.623739 | 2.279022  |
| 16 | 8 | 0 | -1.593792 | -1.945169 | 0.153182  |
| 17 | 1 | 0 | -2.031817 | -1.806480 | -0.696271 |
| 18 | 8 | 0 | -2.421266 | 0.221944  | -1.168597 |
| 19 | 1 | 0 | -2.348164 | 1.035652  | -1.678998 |
| 20 | 1 | 0 | -1.525019 | 2.562385  | 0.358645  |
| 21 | 1 | 0 | 2.009373  | 0.716520  | -0.185380 |
| 22 | 8 | 0 | 3.820356  | -0.347280 | -0.202180 |
| 23 | 1 | 0 | 4.153450  | -0.134884 | 0.675619  |
| 24 | 1 | 0 | 3.201644  | -1.076932 | -0.052740 |
| 25 | 8 | 0 | 1.287279  | -1.645323 | 0.182199  |
| 26 | 1 | 0 | 0.784520  | -2.470476 | 0.146110  |

**wB-IM2 (E=-738.991566158)**

Sum of electronic and zero-point Energies= -738.778713

Sum of electronic and thermal Energies= -738.764324

Sum of electronic and thermal Enthalpies= -738.763380

Sum of electronic and thermal Free Energies= -738.818257

|   |   |   |           |           |           |
|---|---|---|-----------|-----------|-----------|
| 1 | 7 | 0 | -1.590877 | 1.338868  | 0.140677  |
| 2 | 6 | 0 | -1.825239 | 0.000559  | -0.285111 |
| 3 | 6 | 0 | -0.816326 | -0.968778 | 0.364809  |

|    |   |   |           |           |           |
|----|---|---|-----------|-----------|-----------|
| 4  | 6 | 0 | 0.651777  | -0.458835 | 0.094342  |
| 5  | 7 | 0 | 1.170934  | -0.818884 | -1.239730 |
| 6  | 1 | 0 | 1.114554  | -1.830717 | -1.325202 |
| 7  | 1 | 0 | 0.576532  | -0.409873 | -1.956023 |
| 8  | 7 | 0 | 0.707665  | 0.994032  | 0.212105  |
| 9  | 6 | 0 | -0.318212 | 1.901218  | 0.220930  |
| 10 | 8 | 0 | -0.155584 | 3.102714  | 0.314162  |
| 11 | 1 | 0 | -2.835694 | -0.294505 | 0.012615  |
| 12 | 6 | 0 | -1.092500 | -1.103948 | 1.859422  |
| 13 | 1 | 0 | -0.895737 | -0.173022 | 2.390516  |
| 14 | 1 | 0 | -2.134932 | -1.393827 | 2.011440  |
| 15 | 1 | 0 | -0.446814 | -1.878621 | 2.267084  |
| 16 | 8 | 0 | -0.990312 | -2.256173 | -0.212624 |
| 17 | 1 | 0 | -1.250852 | -2.111278 | -1.131448 |
| 18 | 8 | 0 | -1.695207 | -0.191527 | -1.717558 |
| 19 | 1 | 0 | -2.401352 | 0.290527  | -2.159464 |
| 20 | 1 | 0 | -2.327546 | 2.024445  | 0.076539  |
| 21 | 1 | 0 | 1.635287  | 1.400132  | 0.219260  |
| 22 | 8 | 0 | 1.479010  | -1.069733 | 1.040132  |
| 23 | 1 | 0 | 2.387997  | -0.772189 | 0.852041  |
| 24 | 1 | 0 | 2.960777  | -0.152789 | -0.988851 |
| 25 | 8 | 0 | 3.555361  | 0.219353  | -0.300937 |

|    |   |   |          |          |           |
|----|---|---|----------|----------|-----------|
| 26 | 1 | 0 | 4.460574 | 0.045236 | -0.571625 |
|----|---|---|----------|----------|-----------|

**wB-TS3 (E=-738.960406423)**

Sum of electronic and zero-point Energies= -738.753804

Sum of electronic and thermal Energies= -738.740521

Sum of electronic and thermal Enthalpies= -738.739577

Sum of electronic and thermal Free Energies= -738.792430

|    |   |   |           |           |           |
|----|---|---|-----------|-----------|-----------|
| 1  | 7 | 0 | -2.057652 | 0.558339  | -0.085068 |
| 2  | 6 | 0 | -1.622361 | -0.778933 | -0.295639 |
| 3  | 6 | 0 | -0.323419 | -1.084182 | 0.480822  |
| 4  | 6 | 0 | 0.765105  | 0.019445  | 0.194200  |
| 5  | 7 | 0 | 1.407317  | -0.274460 | -1.190503 |
| 6  | 1 | 0 | 1.630680  | -1.269287 | -1.198548 |
| 7  | 1 | 0 | 0.768211  | -0.065802 | -1.953056 |
| 8  | 7 | 0 | 0.127583  | 1.342009  | 0.059906  |
| 9  | 6 | 0 | -1.212586 | 1.651911  | 0.057094  |
| 10 | 8 | 0 | -1.642477 | 2.782839  | 0.171229  |
| 11 | 1 | 0 | -2.406662 | -1.462086 | 0.044398  |
| 12 | 6 | 0 | -0.583655 | -1.169904 | 1.979901  |
| 13 | 1 | 0 | -0.941323 | -0.222293 | 2.384570  |
| 14 | 1 | 0 | -1.321856 | -1.950048 | 2.178451  |

|    |   |   |           |           |           |
|----|---|---|-----------|-----------|-----------|
| 15 | 1 | 0 | 0.352266  | -1.422508 | 2.474068  |
| 16 | 8 | 0 | 0.167010  | -2.355639 | 0.053601  |
| 17 | 1 | 0 | -0.216157 | -2.522098 | -0.817668 |
| 18 | 8 | 0 | -1.328567 | -1.078379 | -1.687188 |
| 19 | 1 | 0 | -2.142739 | -1.002075 | -2.195331 |
| 20 | 1 | 0 | -3.036962 | 0.793188  | -0.115859 |
| 21 | 1 | 0 | 0.710350  | 2.106018  | 0.372451  |
| 22 | 8 | 0 | 1.754241  | 0.028514  | 1.087919  |
| 23 | 1 | 0 | 2.720392  | 0.464827  | 0.525531  |
| 24 | 1 | 0 | 2.417113  | 0.329142  | -1.113777 |
| 25 | 8 | 0 | 3.467896  | 0.783064  | -0.396353 |
| 26 | 1 | 0 | 3.642628  | 1.728583  | -0.407499 |

**wB-PC (E=-739.021820520)**

|                                              |             |
|----------------------------------------------|-------------|
| Sum of electronic and zero-point Energies=   | -738.811435 |
| Sum of electronic and thermal Energies=      | -738.795509 |
| Sum of electronic and thermal Enthalpies=    | -738.794565 |
| Sum of electronic and thermal Free Energies= | -738.853792 |

|   |   |   |           |           |          |
|---|---|---|-----------|-----------|----------|
| 1 | 7 | 0 | 2.138644  | 0.751766  | 0.444724 |
| 2 | 6 | 0 | 0.779909  | 1.099508  | 0.791970 |
| 3 | 6 | 0 | -0.055002 | -0.194496 | 0.938901 |

|    |   |   |           |           |           |
|----|---|---|-----------|-----------|-----------|
| 4  | 6 | 0 | 0.078945  | -0.988404 | -0.376635 |
| 5  | 7 | 0 | -2.656418 | 1.744472  | -0.824372 |
| 6  | 1 | 0 | -3.276635 | 2.487580  | -0.515952 |
| 7  | 1 | 0 | -2.354298 | 1.977429  | -1.766517 |
| 8  | 7 | 0 | 1.339554  | -0.964744 | -0.927884 |
| 9  | 6 | 0 | 2.410287  | -0.110058 | -0.592182 |
| 10 | 8 | 0 | 3.468929  | -0.181316 | -1.171334 |
| 11 | 1 | 0 | 0.794788  | 1.609993  | 1.761634  |
| 12 | 6 | 0 | 0.440565  | -1.066926 | 2.098627  |
| 13 | 1 | 0 | 1.482126  | -1.362154 | 1.978123  |
| 14 | 1 | 0 | 0.334290  | -0.506296 | 3.029785  |
| 15 | 1 | 0 | -0.184089 | -1.959113 | 2.163268  |
| 16 | 8 | 0 | -1.397570 | 0.113024  | 1.226383  |
| 17 | 1 | 0 | -1.785222 | 0.645318  | 0.504796  |
| 18 | 8 | 0 | 0.269318  | 1.947506  | -0.221019 |
| 19 | 1 | 0 | -0.699405 | 2.020624  | -0.154937 |
| 20 | 1 | 0 | 2.839603  | 1.472453  | 0.543727  |
| 21 | 1 | 0 | 1.491329  | -1.529131 | -1.754428 |
| 22 | 8 | 0 | -0.821473 | -1.629904 | -0.884786 |
| 23 | 1 | 0 | -2.713563 | -1.391530 | -0.696684 |
| 24 | 1 | 0 | -3.210853 | 0.881821  | -0.891925 |
| 25 | 8 | 0 | -3.609112 | -1.049014 | -0.529449 |

|    |   |   |           |           |          |
|----|---|---|-----------|-----------|----------|
| 26 | 1 | 0 | -3.679473 | -1.107561 | 0.429388 |
|----|---|---|-----------|-----------|----------|

### Path C

#### wC-RC (E=-738.981367309)

Sum of electronic and zero-point Energies= -738.772996

Sum of electronic and thermal Energies= -738.756490

Sum of electronic and thermal Enthalpies= -738.755546

Sum of electronic and thermal Free Energies= -738.815625

|    |   |   |           |           |           |
|----|---|---|-----------|-----------|-----------|
| 1  | 7 | 0 | -1.063939 | 1.607513  | 0.374188  |
| 2  | 6 | 0 | -1.819348 | 0.412691  | 0.575966  |
| 3  | 6 | 0 | -0.854924 | -0.792571 | 0.472569  |
| 4  | 6 | 0 | -0.044941 | -0.585598 | -0.807000 |
| 5  | 7 | 0 | 0.342266  | -1.728484 | -1.460865 |
| 6  | 1 | 0 | -0.254784 | -2.531235 | -1.315552 |
| 7  | 1 | 0 | 0.666451  | -1.574445 | -2.407421 |
| 8  | 7 | 0 | 0.343467  | 0.557673  | -1.231080 |
| 9  | 6 | 0 | -0.005866 | 1.712461  | -0.509785 |
| 10 | 8 | 0 | 0.598449  | 2.756832  | -0.649238 |
| 11 | 1 | 0 | -2.245865 | 0.438014  | 1.588352  |
| 12 | 6 | 0 | 0.071521  | -0.912421 | 1.684067  |
| 13 | 1 | 0 | 0.767389  | -0.071521 | 1.744731  |
| 14 | 1 | 0 | -0.521495 | -0.958176 | 2.604201  |



|    |   |   |           |           |           |
|----|---|---|-----------|-----------|-----------|
| 15 | 1 | 0 | 0.662045  | -1.828217 | 1.601666  |
| 16 | 8 | 0 | -1.640041 | -1.989471 | 0.299376  |
| 17 | 1 | 0 | -1.770538 | -2.389464 | 1.165840  |
| 18 | 8 | 0 | -2.855651 | 0.309736  | -0.385900 |
| 19 | 1 | 0 | -3.133933 | -0.615781 | -0.388457 |
| 20 | 1 | 0 | -1.384035 | 2.477678  | 0.770051  |
| 21 | 1 | 0 | 2.891026  | 0.400944  | 0.554326  |
| 22 | 8 | 0 | 2.587929  | 1.123264  | 1.127941  |
| 23 | 1 | 0 | 2.338027  | 1.832993  | 0.522974  |
| 24 | 8 | 0 | 3.166067  | -1.390765 | -0.214293 |
| 25 | 1 | 0 | 2.343448  | -1.700295 | -0.620880 |
| 26 | 1 | 0 | 3.357028  | -2.021556 | 0.486458  |

**wC-TS1 (E=-738.910065548)**

Sum of electronic and zero-point Energies= -738.706006

Sum of electronic and thermal Energies= -738.691743

Sum of electronic and thermal Enthalpies= -738.690799

Sum of electronic and thermal Free Energies= -738.746260

|   |   |   |           |          |          |
|---|---|---|-----------|----------|----------|
| 1 | 7 | 0 | 2.248647  | 0.203210 | 0.045399 |
| 2 | 6 | 0 | 1.331981  | 1.290666 | 0.030849 |
| 3 | 6 | 0 | -0.015816 | 0.781177 | 0.595458 |

|    |   |   |           |           |           |
|----|---|---|-----------|-----------|-----------|
| 4  | 6 | 0 | -0.324572 | -0.445529 | -0.276585 |
| 5  | 7 | 0 | -1.291010 | -0.179358 | -1.381355 |
| 6  | 1 | 0 | -0.992179 | 0.695146  | -1.817978 |
| 7  | 1 | 0 | -1.146092 | -0.938396 | -2.048582 |
| 8  | 7 | 0 | 0.569580  | -1.317927 | -0.583548 |
| 9  | 6 | 0 | 1.886794  | -1.136574 | -0.158720 |
| 10 | 8 | 0 | 2.703578  | -2.023402 | -0.058791 |
| 11 | 1 | 0 | 1.705682  | 2.091514  | 0.677924  |
| 12 | 6 | 0 | 0.106509  | 0.487658  | 2.089081  |
| 13 | 1 | 0 | 0.824285  | -0.308392 | 2.285911  |
| 14 | 1 | 0 | 0.440099  | 1.394411  | 2.600936  |
| 15 | 1 | 0 | -0.856199 | 0.163348  | 2.478001  |
| 16 | 8 | 0 | -0.965996 | 1.823944  | 0.357763  |
| 17 | 1 | 0 | -1.745549 | 1.625401  | 0.888602  |
| 18 | 8 | 0 | 1.153295  | 1.803698  | -1.300233 |
| 19 | 1 | 0 | 0.647544  | 2.620915  | -1.209321 |
| 20 | 1 | 0 | 3.237164  | 0.374351  | 0.136802  |
| 21 | 1 | 0 | -2.847599 | -0.980994 | 0.331966  |
| 22 | 8 | 0 | -1.779353 | -1.241265 | 0.917667  |
| 23 | 1 | 0 | -1.538913 | -2.173754 | 0.893492  |
| 24 | 8 | 0 | -3.581148 | -0.529756 | -0.457495 |
| 25 | 1 | 0 | -2.395310 | -0.155665 | -1.058284 |

|    |   |   |           |          |           |
|----|---|---|-----------|----------|-----------|
| 26 | 1 | 0 | -4.175829 | 0.120501 | -0.074724 |
|----|---|---|-----------|----------|-----------|

**wC-IM1 (E=-738.998367467)**

Sum of electronic and zero-point Energies= -738.789014

Sum of electronic and thermal Energies= -738.772961

Sum of electronic and thermal Enthalpies= -738.772017

Sum of electronic and thermal Free Energies= -738.831954

|    |   |   |           |           |           |
|----|---|---|-----------|-----------|-----------|
| 1  | 7 | 0 | -1.823127 | -1.323808 | 0.280111  |
| 2  | 6 | 0 | -0.568595 | -1.799332 | -0.231830 |
| 3  | 6 | 0 | 0.566694  | -0.875350 | 0.261942  |
| 4  | 6 | 0 | 0.090011  | 0.563607  | 0.050480  |
| 5  | 7 | 0 | 3.938755  | 0.330692  | -0.011492 |
| 6  | 1 | 0 | 4.499233  | 0.417396  | -0.853802 |
| 7  | 1 | 0 | 3.487947  | 1.226367  | 0.150936  |
| 8  | 7 | 0 | -1.136960 | 0.949197  | 0.062787  |
| 9  | 6 | 0 | -2.183619 | 0.013770  | 0.219210  |
| 10 | 8 | 0 | -3.332814 | 0.376422  | 0.330407  |
| 11 | 1 | 0 | -0.393572 | -2.806986 | 0.164955  |
| 12 | 6 | 0 | 0.863947  | -1.092104 | 1.754164  |
| 13 | 1 | 0 | -0.028452 | -0.949625 | 2.366053  |
| 14 | 1 | 0 | 1.233478  | -2.110486 | 1.893084  |

|    |   |   |           |           |           |
|----|---|---|-----------|-----------|-----------|
| 15 | 1 | 0 | 1.634434  | -0.395406 | 2.090922  |
| 16 | 8 | 0 | 1.674072  | -1.199701 | -0.546969 |
| 17 | 1 | 0 | 2.479256  | -0.679038 | -0.296788 |
| 18 | 8 | 0 | -0.599630 | -1.829473 | -1.646897 |
| 19 | 1 | 0 | 0.328328  | -1.829081 | -1.924071 |
| 20 | 1 | 0 | -2.614416 | -1.947801 | 0.209441  |
| 21 | 1 | 0 | -1.139774 | 2.882883  | -0.087645 |
| 22 | 8 | 0 | 1.064319  | 1.450404  | -0.107767 |
| 23 | 1 | 0 | 0.648438  | 2.355854  | -0.207216 |
| 24 | 8 | 0 | -0.488088 | 3.600198  | -0.252291 |
| 25 | 1 | 0 | 4.572363  | 0.147618  | 0.760000  |
| 26 | 1 | 0 | -0.711448 | 3.949401  | -1.121377 |

**wC-TS2 (E=-738.986447652)**

|                                              |             |
|----------------------------------------------|-------------|
| Sum of electronic and zero-point Energies=   | -738.782555 |
| Sum of electronic and thermal Energies=      | -738.767718 |
| Sum of electronic and thermal Enthalpies=    | -738.766774 |
| Sum of electronic and thermal Free Energies= | -738.823800 |

|   |   |   |           |           |           |
|---|---|---|-----------|-----------|-----------|
| 1 | 7 | 0 | -1.845989 | -1.251427 | 0.287719  |
| 2 | 6 | 0 | -0.599688 | -1.757164 | -0.219189 |
| 3 | 6 | 0 | 0.561894  | -0.868948 | 0.278044  |

|    |   |   |           |           |           |
|----|---|---|-----------|-----------|-----------|
| 4  | 6 | 0 | 0.159563  | 0.592383  | 0.046953  |
| 5  | 7 | 0 | 3.904475  | 0.332360  | -0.045985 |
| 6  | 1 | 0 | 4.483348  | 0.414844  | -0.875824 |
| 7  | 1 | 0 | 3.368310  | 1.190818  | 0.048296  |
| 8  | 7 | 0 | -1.099374 | 0.981687  | 0.066869  |
| 9  | 6 | 0 | -2.177000 | 0.091333  | 0.205929  |
| 10 | 8 | 0 | -3.317630 | 0.489710  | 0.284217  |
| 11 | 1 | 0 | -0.455379 | -2.770295 | 0.175506  |
| 12 | 6 | 0 | 0.832892  | -1.075529 | 1.776764  |
| 13 | 1 | 0 | -0.057888 | -0.885249 | 2.378057  |
| 14 | 1 | 0 | 1.157020  | -2.106389 | 1.935169  |
| 15 | 1 | 0 | 1.629911  | -0.407309 | 2.109341  |
| 16 | 8 | 0 | 1.664912  | -1.246496 | -0.512074 |
| 17 | 1 | 0 | 2.476232  | -0.722173 | -0.287358 |
| 18 | 8 | 0 | -0.624909 | -1.781731 | -1.634965 |
| 19 | 1 | 0 | 0.304894  | -1.812925 | -1.905045 |
| 20 | 1 | 0 | -2.651300 | -1.855941 | 0.206423  |
| 21 | 1 | 0 | -1.069892 | 2.369010  | -0.096577 |
| 22 | 8 | 0 | 1.089004  | 1.464361  | -0.119211 |
| 23 | 1 | 0 | 0.497396  | 2.543164  | -0.234795 |
| 24 | 8 | 0 | -0.434747 | 3.299753  | -0.240319 |
| 25 | 1 | 0 | 4.523087  | 0.246942  | 0.753829  |

|    |   |   |           |          |           |
|----|---|---|-----------|----------|-----------|
| 26 | 1 | 0 | -0.598520 | 3.659939 | -1.119431 |
|----|---|---|-----------|----------|-----------|

**wC-PC (E=-739.023063182)**

Sum of electronic and zero-point Energies= -738.813539

Sum of electronic and thermal Energies= -738.797209

Sum of electronic and thermal Enthalpies= -738.796265

Sum of electronic and thermal Free Energies= -738.856661

|    |   |   |           |           |           |
|----|---|---|-----------|-----------|-----------|
| 1  | 7 | 0 | -1.758899 | -1.410062 | 0.241152  |
| 2  | 6 | 0 | -0.474336 | -1.811623 | -0.271213 |
| 3  | 6 | 0 | 0.631663  | -0.885762 | 0.278299  |
| 4  | 6 | 0 | 0.208522  | 0.582903  | 0.065469  |
| 5  | 7 | 0 | 3.881184  | 0.534410  | -0.054035 |
| 6  | 1 | 0 | 4.470102  | 0.639709  | -0.874085 |
| 7  | 1 | 0 | 3.262234  | 1.340022  | -0.003598 |
| 8  | 7 | 0 | -1.131149 | 0.841267  | 0.128710  |
| 9  | 6 | 0 | -2.175890 | -0.099065 | 0.210332  |
| 10 | 8 | 0 | -3.329861 | 0.253181  | 0.283790  |
| 11 | 1 | 0 | -0.276450 | -2.831715 | 0.078684  |
| 12 | 6 | 0 | 0.872720  | -1.111278 | 1.779503  |
| 13 | 1 | 0 | -0.030599 | -0.943859 | 2.369077  |
| 14 | 1 | 0 | 1.211376  | -2.138405 | 1.931436  |
| 15 | 1 | 0 | 1.652746  | -0.434994 | 2.135212  |

|    |   |   |           |           |           |
|----|---|---|-----------|-----------|-----------|
| 16 | 8 | 0 | 1.766562  | -1.206667 | -0.488260 |
| 17 | 1 | 0 | 2.539695  | -0.622646 | -0.269322 |
| 18 | 8 | 0 | -0.486658 | -1.766894 | -1.685042 |
| 19 | 1 | 0 | 0.446852  | -1.739130 | -1.944219 |
| 20 | 1 | 0 | -2.522334 | -2.062330 | 0.132724  |
| 21 | 1 | 0 | -1.411688 | 1.825216  | 0.061366  |
| 22 | 8 | 0 | 1.029418  | 1.480968  | -0.093469 |
| 23 | 1 | 0 | 0.087198  | 3.212725  | -0.219680 |
| 24 | 8 | 0 | -0.770116 | 3.671529  | -0.218773 |
| 25 | 1 | 0 | 4.485102  | 0.537022  | 0.761379  |
| 26 | 1 | 0 | -0.903012 | 3.951083  | -1.130076 |

**I.2 At the Mp2/6-311g(d,p) Level**  
**Direct Deamination Mechanism**

**Path A**

**A-RE (EUMP2= -0.66079545542378D+03)**

|                                              |             |
|----------------------------------------------|-------------|
| Sum of electronic and zero-point Energies=   | -660.608523 |
| Sum of electronic and thermal Energies=      | -660.595386 |
| Sum of electronic and thermal Enthalpies=    | -660.594442 |
| Sum of electronic and thermal Free Energies= | -660.647170 |

|   |   |   |           |           |           |
|---|---|---|-----------|-----------|-----------|
| 1 | 7 | 0 | -0.859387 | 1.702999  | 0.204855  |
| 2 | 6 | 0 | -1.600641 | 0.631573  | -0.378640 |
| 3 | 6 | 0 | -1.110633 | -0.663085 | 0.267683  |

|    |   |   |           |           |           |
|----|---|---|-----------|-----------|-----------|
| 4  | 6 | 0 | 0.401376  | -0.684683 | 0.111717  |
| 5  | 7 | 0 | 0.956757  | -1.902597 | 0.004473  |
| 6  | 1 | 0 | 1.960257  | -1.933540 | -0.181716 |
| 7  | 1 | 0 | 0.350315  | -2.658882 | -0.269177 |
| 8  | 7 | 0 | 1.145224  | 0.383609  | 0.161077  |
| 9  | 6 | 0 | 0.543929  | 1.649614  | 0.241014  |
| 10 | 8 | 0 | 1.200383  | 2.661877  | 0.366919  |
| 11 | 1 | 0 | -2.666663 | 0.773431  | -0.143136 |
| 12 | 6 | 0 | -1.477708 | -0.752142 | 1.743912  |
| 13 | 1 | 0 | -1.057338 | 0.088998  | 2.296946  |
| 14 | 1 | 0 | -2.569015 | -0.725589 | 1.855772  |
| 15 | 1 | 0 | -1.095673 | -1.688093 | 2.160284  |
| 16 | 8 | 0 | -1.636019 | -1.780334 | -0.458192 |
| 17 | 1 | 0 | -2.483211 | -1.998880 | -0.056656 |
| 18 | 8 | 0 | -1.406741 | 0.586347  | -1.778583 |
| 19 | 1 | 0 | -1.679959 | -0.299722 | -2.045634 |
| 20 | 1 | 0 | -1.189736 | 2.637800  | 0.001918  |
| 21 | 1 | 0 | 2.971310  | -0.178360 | -0.268798 |
| 22 | 8 | 0 | 3.594590  | -0.915139 | -0.403299 |
| 23 | 1 | 0 | 4.205913  | -0.814903 | 0.328476  |

**A-TS1 (EUMP2=-0.66076918943108D+03)**



|                                              |             |
|----------------------------------------------|-------------|
| Sum of electronic and zero-point Energies=   | -660.588604 |
| Sum of electronic and thermal Energies=      | -660.576891 |
| Sum of electronic and thermal Enthalpies=    | -660.575947 |
| Sum of electronic and thermal Free Energies= | -660.625473 |

|    |   |   |           |           |           |
|----|---|---|-----------|-----------|-----------|
| 1  | 7 | 0 | -0.555310 | 1.789463  | 0.218647  |
| 2  | 6 | 0 | -1.447940 | 0.833958  | -0.358749 |
| 3  | 6 | 0 | -1.161682 | -0.523991 | 0.284119  |
| 4  | 6 | 0 | 0.313939  | -0.801419 | 0.084240  |
| 5  | 7 | 0 | 0.758537  | -2.013494 | -0.138787 |
| 6  | 1 | 0 | 2.033384  | -1.919182 | -0.308538 |
| 7  | 1 | 0 | 0.025899  | -2.698546 | -0.278313 |
| 8  | 7 | 0 | 1.202877  | 0.198425  | 0.192908  |
| 9  | 6 | 0 | 0.827861  | 1.536309  | 0.230422  |
| 10 | 8 | 0 | 1.634128  | 2.440593  | 0.311566  |
| 11 | 1 | 0 | -2.480032 | 1.135050  | -0.121899 |
| 12 | 6 | 0 | -1.493766 | -0.543906 | 1.771222  |
| 13 | 1 | 0 | -0.904538 | 0.199579  | 2.309485  |
| 14 | 1 | 0 | -2.556156 | -0.312094 | 1.917534  |
| 15 | 1 | 0 | -1.283785 | -1.537550 | 2.177030  |
| 16 | 8 | 0 | -1.881703 | -1.539261 | -0.417957 |
| 17 | 1 | 0 | -2.744876 | -1.608585 | 0.002479  |

|    |   |   |           |           |           |
|----|---|---|-----------|-----------|-----------|
| 18 | 8 | 0 | -1.264497 | 0.754873  | -1.758916 |
| 19 | 1 | 0 | -1.668431 | -0.081069 | -2.022784 |
| 20 | 1 | 0 | -0.743156 | 2.758161  | -0.006817 |
| 21 | 1 | 0 | 2.378510  | -0.351363 | -0.083791 |
| 22 | 8 | 0 | 3.042468  | -1.273481 | -0.375213 |
| 23 | 1 | 0 | 3.626812  | -1.472655 | 0.362874  |

**A-IM1 (EUMP2=-0.66079453254996D+03)**

|                                              |             |
|----------------------------------------------|-------------|
| Sum of electronic and zero-point Energies=   | -660.608139 |
| Sum of electronic and thermal Energies=      | -660.594519 |
| Sum of electronic and thermal Enthalpies=    | -660.593574 |
| Sum of electronic and thermal Free Energies= | -660.647739 |

|   |   |   |           |           |           |
|---|---|---|-----------|-----------|-----------|
| 1 | 7 | 0 | -1.711388 | 0.370238  | 0.771050  |
| 2 | 6 | 0 | -1.327901 | -0.964309 | 0.408877  |
| 3 | 6 | 0 | 0.197574  | -1.031643 | 0.296027  |
| 4 | 6 | 0 | 0.631482  | 0.009995  | -0.718866 |
| 5 | 7 | 0 | 1.539248  | -0.128988 | -1.609116 |
| 6 | 1 | 0 | 3.029585  | 1.047831  | -0.431119 |
| 7 | 1 | 0 | 1.867516  | -1.094883 | -1.554610 |
| 8 | 7 | 0 | 0.010620  | 1.241998  | -0.552157 |
| 9 | 6 | 0 | -1.239756 | 1.454672  | 0.042272  |

|    |   |   |           |           |           |
|----|---|---|-----------|-----------|-----------|
| 10 | 8 | 0 | -1.808256 | 2.523014  | -0.026080 |
| 11 | 1 | 0 | -1.660672 | -1.641948 | 1.208283  |
| 12 | 6 | 0 | 0.893001  | -0.785011 | 1.629493  |
| 13 | 1 | 0 | 0.587745  | 0.173827  | 2.050962  |
| 14 | 1 | 0 | 0.614493  | -1.573225 | 2.340088  |
| 15 | 1 | 0 | 1.975521  | -0.770342 | 1.486916  |
| 16 | 8 | 0 | 0.548968  | -2.300395 | -0.251930 |
| 17 | 1 | 0 | 0.776323  | -2.872549 | 0.487166  |
| 18 | 8 | 0 | -1.915910 | -1.315451 | -0.826346 |
| 19 | 1 | 0 | -1.427142 | -2.091395 | -1.129196 |
| 20 | 1 | 0 | -2.684163 | 0.496335  | 1.020321  |
| 21 | 1 | 0 | 0.262503  | 1.952161  | -1.230264 |
| 22 | 8 | 0 | 3.224888  | 1.341889  | 0.464834  |
| 23 | 1 | 0 | 2.465012  | 1.896766  | 0.652378  |

**A-TS2 (EUMP2=-0.66070928487688D+03)**

|                                              |             |
|----------------------------------------------|-------------|
| Sum of electronic and zero-point Energies=   | -660.526964 |
| Sum of electronic and thermal Energies=      | -660.514892 |
| Sum of electronic and thermal Enthalpies=    | -660.513948 |
| Sum of electronic and thermal Free Energies= | -660.564091 |

|   |   |   |          |          |          |
|---|---|---|----------|----------|----------|
| 1 | 7 | 0 | 1.674751 | 0.643221 | 0.564983 |
|---|---|---|----------|----------|----------|

|    |   |   |           |           |           |
|----|---|---|-----------|-----------|-----------|
| 2  | 6 | 0 | 0.578328  | 1.458091  | 0.128058  |
| 3  | 6 | 0 | -0.713736 | 0.673011  | 0.368286  |
| 4  | 6 | 0 | -0.600043 | -0.609162 | -0.448889 |
| 5  | 7 | 0 | -1.311000 | -0.869931 | -1.569020 |
| 6  | 1 | 0 | -1.850543 | -1.726944 | -0.908874 |
| 7  | 1 | 0 | -2.001046 | -0.129056 | -1.676350 |
| 8  | 7 | 0 | 0.604326  | -1.258166 | -0.294938 |
| 9  | 6 | 0 | 1.809694  | -0.658231 | 0.111396  |
| 10 | 8 | 0 | 2.858132  | -1.264147 | 0.078320  |
| 11 | 1 | 0 | 0.551233  | 2.363924  | 0.747004  |
| 12 | 6 | 0 | -0.909085 | 0.407198  | 1.855090  |
| 13 | 1 | 0 | -0.147451 | -0.274501 | 2.235245  |
| 14 | 1 | 0 | -0.848901 | 1.355117  | 2.399191  |
| 15 | 1 | 0 | -1.884077 | -0.060019 | 2.001739  |
| 16 | 8 | 0 | -1.752354 | 1.490514  | -0.147781 |
| 17 | 1 | 0 | -2.577071 | 1.137429  | 0.203073  |
| 18 | 8 | 0 | 0.736733  | 1.782223  | -1.237132 |
| 19 | 1 | 0 | -0.101955 | 2.169047  | -1.516331 |
| 20 | 1 | 0 | 2.572632  | 1.101401  | 0.648144  |
| 21 | 1 | 0 | 0.749922  | -2.051613 | -0.908293 |
| 22 | 8 | 0 | -1.920796 | -1.824850 | 0.414789  |
| 23 | 1 | 0 | -1.603942 | -2.586013 | 0.919067  |

**A-IM2 (EUMP2=-0.66079441570506D+03)**

|                                              |             |
|----------------------------------------------|-------------|
| Sum of electronic and zero-point Energies=   | -660.604575 |
| Sum of electronic and thermal Energies=      | -660.592801 |
| Sum of electronic and thermal Enthalpies=    | -660.591857 |
| Sum of electronic and thermal Free Energies= | -660.640957 |

|    |   |   |           |           |           |
|----|---|---|-----------|-----------|-----------|
| 1  | 7 | 0 | 1.399293  | 1.026942  | 0.449895  |
| 2  | 6 | 0 | 0.067440  | 1.493406  | 0.194945  |
| 3  | 6 | 0 | -0.916923 | 0.336437  | 0.414795  |
| 4  | 6 | 0 | -0.442193 | -0.933540 | -0.325787 |
| 5  | 7 | 0 | -0.472355 | -0.744674 | -1.746134 |
| 6  | 1 | 0 | -0.462337 | -1.659679 | -2.188673 |
| 7  | 1 | 0 | -1.333833 | -0.279582 | -2.010051 |
| 8  | 7 | 0 | 0.889703  | -1.245609 | 0.152177  |
| 9  | 6 | 0 | 1.872188  | -0.243979 | 0.164187  |
| 10 | 8 | 0 | 3.056126  | -0.496928 | 0.058606  |
| 11 | 1 | 0 | -0.169211 | 2.268255  | 0.939434  |
| 12 | 6 | 0 | -1.072917 | 0.080168  | 1.910196  |
| 13 | 1 | 0 | -0.133281 | -0.251471 | 2.356080  |
| 14 | 1 | 0 | -1.394283 | 1.005702  | 2.394435  |
| 15 | 1 | 0 | -1.842788 | -0.676555 | 2.087772  |

|    |   |   |           |           |           |
|----|---|---|-----------|-----------|-----------|
| 16 | 8 | 0 | -2.151549 | 0.775949  | -0.143301 |
| 17 | 1 | 0 | -2.771698 | 0.049284  | -0.011510 |
| 18 | 8 | 0 | -0.002484 | 2.055275  | -1.095630 |
| 19 | 1 | 0 | -0.941685 | 2.192655  | -1.263401 |
| 20 | 1 | 0 | 2.127539  | 1.723045  | 0.360564  |
| 21 | 1 | 0 | 1.273907  | -2.084301 | -0.271959 |
| 22 | 8 | 0 | -1.288758 | -2.035892 | 0.003212  |
| 23 | 1 | 0 | -1.021068 | -2.326149 | 0.882621  |

**A-TS3 (EUMP2= -0.66079376826687D+03)**

|                                              |             |
|----------------------------------------------|-------------|
| Sum of electronic and zero-point Energies=   | -660.604292 |
| Sum of electronic and thermal Energies=      | -660.593101 |
| Sum of electronic and thermal Enthalpies=    | -660.592157 |
| Sum of electronic and thermal Free Energies= | -660.640166 |

|   |   |   |           |           |           |
|---|---|---|-----------|-----------|-----------|
| 1 | 7 | 0 | 1.403985  | 1.027134  | 0.429504  |
| 2 | 6 | 0 | 0.071064  | 1.489116  | 0.198061  |
| 3 | 6 | 0 | -0.908248 | 0.335072  | 0.435751  |
| 4 | 6 | 0 | -0.446152 | -0.926686 | -0.331959 |
| 5 | 7 | 0 | -0.492274 | -0.771417 | -1.761577 |
| 6 | 1 | 0 | -0.949256 | -1.582892 | -2.161756 |
| 7 | 1 | 0 | -0.992066 | 0.065834  | -2.026312 |

|    |   |   |           |           |           |
|----|---|---|-----------|-----------|-----------|
| 8  | 7 | 0 | 0.889873  | -1.249972 | 0.148576  |
| 9  | 6 | 0 | 1.872782  | -0.250224 | 0.154933  |
| 10 | 8 | 0 | 3.056876  | -0.498678 | 0.043770  |
| 11 | 1 | 0 | -0.155214 | 2.278598  | 0.929628  |
| 12 | 6 | 0 | -1.028990 | 0.061433  | 1.931686  |
| 13 | 1 | 0 | -0.080836 | -0.272441 | 2.356724  |
| 14 | 1 | 0 | -1.345780 | 0.980521  | 2.431589  |
| 15 | 1 | 0 | -1.794105 | -0.698590 | 2.114481  |
| 16 | 8 | 0 | -2.153202 | 0.782404  | -0.085130 |
| 17 | 1 | 0 | -2.737615 | 0.015724  | -0.055784 |
| 18 | 8 | 0 | -0.032390 | 2.026812  | -1.108788 |
| 19 | 1 | 0 | -0.948644 | 2.318303  | -1.186233 |
| 20 | 1 | 0 | 2.133982  | 1.721248  | 0.341318  |
| 21 | 1 | 0 | 1.267582  | -2.063577 | -0.328718 |
| 22 | 8 | 0 | -1.293347 | -2.023801 | -0.012999 |
| 23 | 1 | 0 | -0.995369 | -2.349111 | 0.843894  |

**A-IM3 (EUMP2=-0.66079782591994D+03)**

|                                              |             |
|----------------------------------------------|-------------|
| Sum of electronic and zero-point Energies=   | -660.607587 |
| Sum of electronic and thermal Energies=      | -660.595967 |
| Sum of electronic and thermal Enthalpies=    | -660.595023 |
| Sum of electronic and thermal Free Energies= | -660.643621 |

|    |   |   |           |           |           |
|----|---|---|-----------|-----------|-----------|
| 1  | 7 | 0 | 1.433113  | 0.985380  | 0.478323  |
| 2  | 6 | 0 | 0.132834  | 1.478611  | 0.152590  |
| 3  | 6 | 0 | -0.893494 | 0.381626  | 0.437026  |
| 4  | 6 | 0 | -0.504297 | -0.920437 | -0.316864 |
| 5  | 7 | 0 | -0.627457 | -0.891185 | -1.755024 |
| 6  | 1 | 0 | -1.610757 | -0.818731 | -1.998497 |
| 7  | 1 | 0 | -0.171893 | -0.048686 | -2.094650 |
| 8  | 7 | 0 | 0.851997  | -1.254374 | 0.060154  |
| 9  | 6 | 0 | 1.866435  | -0.298650 | 0.162600  |
| 10 | 8 | 0 | 3.043824  | -0.586957 | 0.079625  |
| 11 | 1 | 0 | -0.088038 | 2.336264  | 0.802399  |
| 12 | 6 | 0 | -1.005408 | 0.159879  | 1.942388  |
| 13 | 1 | 0 | -0.089441 | -0.269469 | 2.353567  |
| 14 | 1 | 0 | -1.201927 | 1.116846  | 2.433767  |
| 15 | 1 | 0 | -1.844707 | -0.506912 | 2.160483  |
| 16 | 8 | 0 | -2.121891 | 0.875778  | -0.083520 |
| 17 | 1 | 0 | -2.765141 | 0.169524  | 0.046238  |
| 18 | 8 | 0 | 0.099163  | 1.903701  | -1.205175 |
| 19 | 1 | 0 | -0.828104 | 2.116195  | -1.372469 |
| 20 | 1 | 0 | 2.190280  | 1.654021  | 0.428139  |
| 21 | 1 | 0 | 1.189878  | -2.072424 | -0.437512 |



|    |   |   |           |           |          |
|----|---|---|-----------|-----------|----------|
| 22 | 8 | 0 | -1.381749 | -1.957554 | 0.081491 |
| 23 | 1 | 0 | -1.074927 | -2.241295 | 0.948556 |

**A-TS4 (EUMP2= -0.66079571368438D+03)**

|                                              |             |
|----------------------------------------------|-------------|
| Sum of electronic and zero-point Energies=   | -660.606186 |
| Sum of electronic and thermal Energies=      | -660.594945 |
| Sum of electronic and thermal Enthalpies=    | -660.594001 |
| Sum of electronic and thermal Free Energies= | -660.642032 |

|    |   |   |           |           |           |
|----|---|---|-----------|-----------|-----------|
| 1  | 7 | 0 | 1.428330  | 0.989295  | 0.485949  |
| 2  | 6 | 0 | 0.132676  | 1.478859  | 0.135019  |
| 3  | 6 | 0 | -0.896189 | 0.389159  | 0.429286  |
| 4  | 6 | 0 | -0.508098 | -0.922390 | -0.302268 |
| 5  | 7 | 0 | -0.619694 | -0.924827 | -1.745178 |
| 6  | 1 | 0 | -1.599324 | -0.818632 | -1.991143 |
| 7  | 1 | 0 | -0.129674 | -0.111048 | -2.108427 |
| 8  | 7 | 0 | 0.852782  | -1.255491 | 0.062215  |
| 9  | 6 | 0 | 1.863782  | -0.292974 | 0.179291  |
| 10 | 8 | 0 | 3.040850  | -0.584221 | 0.100150  |
| 11 | 1 | 0 | -0.094637 | 2.347375  | 0.767288  |
| 12 | 6 | 0 | -1.013739 | 0.186882  | 1.935110  |
| 13 | 1 | 0 | -0.090868 | -0.218941 | 2.353312  |

|    |   |   |           |           |           |
|----|---|---|-----------|-----------|-----------|
| 14 | 1 | 0 | -1.230749 | 1.148590  | 2.409439  |
| 15 | 1 | 0 | -1.826790 | -0.508912 | 2.150823  |
| 16 | 8 | 0 | -2.120041 | 0.880024  | -0.109005 |
| 17 | 1 | 0 | -2.793675 | 0.235109  | 0.132919  |
| 18 | 8 | 0 | 0.119032  | 1.879115  | -1.230788 |
| 19 | 1 | 0 | -0.804398 | 2.093990  | -1.414682 |
| 20 | 1 | 0 | 2.186790  | 1.657095  | 0.445388  |
| 21 | 1 | 0 | 1.207403  | -2.031636 | -0.489778 |
| 22 | 8 | 0 | -1.418419 | -1.904057 | 0.167001  |
| 23 | 1 | 0 | -0.895964 | -2.659928 | 0.446461  |

**A-IM4 (EUMP2= -0.66080175375546D+03)**

Sum of electronic and zero-point Energies= -660.611295

Sum of electronic and thermal Energies= -660.599729

Sum of electronic and thermal Enthalpies= -660.598785

Sum of electronic and thermal Free Energies= -660.647391

|   |   |   |           |           |           |
|---|---|---|-----------|-----------|-----------|
| 1 | 7 | 0 | 1.448478  | 0.994347  | 0.430486  |
| 2 | 6 | 0 | 0.144674  | 1.476816  | 0.103995  |
| 3 | 6 | 0 | -0.885207 | 0.398259  | 0.443336  |
| 4 | 6 | 0 | -0.511553 | -0.921946 | -0.265088 |
| 5 | 7 | 0 | -0.651947 | -0.945571 | -1.709092 |

|    |   |   |           |           |           |
|----|---|---|-----------|-----------|-----------|
| 6  | 1 | 0 | -1.554359 | -0.538069 | -1.942572 |
| 7  | 1 | 0 | 0.047481  | -0.333621 | -2.119058 |
| 8  | 7 | 0 | 0.851045  | -1.244030 | 0.093298  |
| 9  | 6 | 0 | 1.872415  | -0.305487 | 0.171414  |
| 10 | 8 | 0 | 3.049400  | -0.607636 | 0.111353  |
| 11 | 1 | 0 | -0.067763 | 2.357509  | 0.725102  |
| 12 | 6 | 0 | -0.985865 | 0.220983  | 1.952822  |
| 13 | 1 | 0 | -0.043182 | -0.135462 | 2.370433  |
| 14 | 1 | 0 | -1.243581 | 1.182682  | 2.406360  |
| 15 | 1 | 0 | -1.764551 | -0.507603 | 2.188850  |
| 16 | 8 | 0 | -2.116019 | 0.876415  | -0.092622 |
| 17 | 1 | 0 | -2.779680 | 0.229845  | 0.172882  |
| 18 | 8 | 0 | 0.100740  | 1.848551  | -1.268555 |
| 19 | 1 | 0 | -0.824767 | 2.063369  | -1.438363 |
| 20 | 1 | 0 | 2.206440  | 1.657977  | 0.346061  |
| 21 | 1 | 0 | 1.186771  | -2.131229 | -0.261745 |
| 22 | 8 | 0 | -1.415422 | -1.884581 | 0.233815  |
| 23 | 1 | 0 | -1.452227 | -2.552357 | -0.461606 |

**A-TS5 (EUMP2=-0.66074932196131D+03)**

Sum of electronic and zero-point Energies= -660.564553

Sum of electronic and thermal Energies= -660.552934

Sum of electronic and thermal Enthalpies= -660.551990

Sum of electronic and thermal Free Energies= -660.601407

|    |   |   |           |           |           |
|----|---|---|-----------|-----------|-----------|
| 1  | 7 | 0 | 1.391094  | 1.088844  | 0.135254  |
| 2  | 6 | 0 | 0.020586  | 1.490472  | 0.095212  |
| 3  | 6 | 0 | -0.861042 | 0.325761  | 0.548080  |
| 4  | 6 | 0 | -0.434112 | -0.970124 | -0.149068 |
| 5  | 7 | 0 | -0.696734 | -0.885367 | -1.692628 |
| 6  | 1 | 0 | -1.231871 | -0.060036 | -1.952890 |
| 7  | 1 | 0 | 0.143381  | -0.957585 | -2.263125 |
| 8  | 7 | 0 | 0.952337  | -1.196075 | 0.115155  |
| 9  | 6 | 0 | 1.910604  | -0.198774 | 0.093977  |
| 10 | 8 | 0 | 3.108323  | -0.415439 | 0.083048  |
| 11 | 1 | 0 | -0.122268 | 2.333670  | 0.785748  |
| 12 | 6 | 0 | -0.801973 | 0.136533  | 2.057462  |
| 13 | 1 | 0 | 0.228012  | 0.067959  | 2.413428  |
| 14 | 1 | 0 | -1.297449 | 0.985763  | 2.536497  |
| 15 | 1 | 0 | -1.325797 | -0.786978 | 2.317129  |
| 16 | 8 | 0 | -2.186298 | 0.623910  | 0.127942  |
| 17 | 1 | 0 | -2.656570 | -0.211540 | 0.267646  |
| 18 | 8 | 0 | -0.308652 | 1.916233  | -1.225620 |
| 19 | 1 | 0 | -1.229938 | 2.198113  | -1.166569 |

|    |   |   |           |           |           |
|----|---|---|-----------|-----------|-----------|
| 20 | 1 | 0 | 2.098270  | 1.803548  | 0.049632  |
| 21 | 1 | 0 | 1.285779  | -2.149240 | 0.078740  |
| 22 | 8 | 0 | -1.254872 | -2.016455 | 0.069370  |
| 23 | 1 | 0 | -1.290816 | -1.844699 | -1.282593 |

**A-PC (EUMP2=-0.66082185618707D+03)**

|                                              |             |
|----------------------------------------------|-------------|
| Sum of electronic and zero-point Energies=   | -660.634297 |
| Sum of electronic and thermal Energies=      | -660.621052 |
| Sum of electronic and thermal Enthalpies=    | -660.620107 |
| Sum of electronic and thermal Free Energies= | -660.673511 |

|    |   |   |           |           |           |
|----|---|---|-----------|-----------|-----------|
| 1  | 7 | 0 | -1.056220 | -1.193843 | 0.785946  |
| 2  | 6 | 0 | 0.329440  | -0.831461 | 0.569595  |
| 3  | 6 | 0 | 0.396997  | 0.699819  | 0.525976  |
| 4  | 6 | 0 | -0.503732 | 1.162210  | -0.609649 |
| 5  | 7 | 0 | 3.540554  | -1.188020 | -0.455510 |
| 6  | 1 | 0 | 3.499693  | -0.278347 | -0.005151 |
| 7  | 1 | 0 | 4.144167  | -1.787652 | 0.095997  |
| 8  | 7 | 0 | -1.703980 | 0.501993  | -0.692626 |
| 9  | 6 | 0 | -2.026577 | -0.727514 | -0.079581 |
| 10 | 8 | 0 | -3.092232 | -1.266494 | -0.284385 |
| 11 | 1 | 0 | 0.905005  | -1.181660 | 1.438844  |

|    |   |   |           |           |           |
|----|---|---|-----------|-----------|-----------|
| 12 | 6 | 0 | -0.057435 | 1.342451  | 1.836839  |
| 13 | 1 | 0 | -1.088873 | 1.085844  | 2.085031  |
| 14 | 1 | 0 | 0.599682  | 1.001348  | 2.642616  |
| 15 | 1 | 0 | 0.038579  | 2.428332  | 1.748703  |
| 16 | 8 | 0 | 1.720608  | 1.102292  | 0.230651  |
| 17 | 1 | 0 | 1.604861  | 1.785190  | -0.447941 |
| 18 | 8 | 0 | 0.778187  | -1.411576 | -0.618032 |
| 19 | 1 | 0 | 1.763213  | -1.394358 | -0.601666 |
| 20 | 1 | 0 | -1.215205 | -2.169132 | 1.005434  |
| 21 | 1 | 0 | -2.351579 | 0.800269  | -1.411926 |
| 22 | 8 | 0 | -0.180532 | 2.082208  | -1.343509 |
| 23 | 1 | 0 | 3.997572  | -1.055209 | -1.351477 |

### Path B

#### B-RE (EUMP2=-0.66079037539853D+03)

|                                              |             |
|----------------------------------------------|-------------|
| Sum of electronic and zero-point Energies=   | -660.604304 |
| Sum of electronic and thermal Energies=      | -660.590626 |
| Sum of electronic and thermal Enthalpies=    | -660.589682 |
| Sum of electronic and thermal Free Energies= | -660.643485 |

|   |   |   |           |           |          |
|---|---|---|-----------|-----------|----------|
| 1 | 7 | 0 | 0.507425  | 1.456967  | 0.544637 |
| 2 | 6 | 0 | -0.894891 | 1.213101  | 0.582618 |
| 3 | 6 | 0 | -1.096293 | -0.295705 | 0.442849 |

|    |   |   |           |           |           |
|----|---|---|-----------|-----------|-----------|
| 4  | 6 | 0 | -0.331927 | -0.711216 | -0.800976 |
| 5  | 7 | 0 | -0.878801 | -1.727175 | -1.502754 |
| 6  | 1 | 0 | -0.454549 | -1.938652 | -2.393982 |
| 7  | 1 | 0 | -1.864039 | -1.894539 | -1.373264 |
| 8  | 7 | 0 | 0.817387  | -0.218686 | -1.141364 |
| 9  | 6 | 0 | 1.340225  | 0.850282  | -0.391392 |
| 10 | 8 | 0 | 2.489546  | 1.225096  | -0.532765 |
| 11 | 1 | 0 | -1.283113 | 1.539492  | 1.559232  |
| 12 | 6 | 0 | -0.570198 | -1.078348 | 1.640384  |
| 13 | 1 | 0 | 0.516002  | -0.997666 | 1.718300  |
| 14 | 1 | 0 | -1.028433 | -0.699507 | 2.562385  |
| 15 | 1 | 0 | -0.828517 | -2.134480 | 1.516508  |
| 16 | 8 | 0 | -2.488006 | -0.555108 | 0.217928  |
| 17 | 1 | 0 | -2.877028 | -0.740165 | 1.078562  |
| 18 | 8 | 0 | -1.554541 | 1.897173  | -0.465309 |
| 19 | 1 | 0 | -2.424962 | 1.484932  | -0.524562 |
| 20 | 1 | 0 | 0.844793  | 2.355637  | 0.859953  |
| 21 | 1 | 0 | 2.421548  | -1.537787 | -0.080546 |
| 22 | 8 | 0 | 2.792760  | -1.473347 | 0.804963  |
| 23 | 1 | 0 | 3.256639  | -0.634204 | 0.734346  |

**B-TS1 (EUMP2= -0.66071311279429D+03)**

|                                              |             |
|----------------------------------------------|-------------|
| Sum of electronic and zero-point Energies=   | -660.531093 |
| Sum of electronic and thermal Energies=      | -660.519000 |
| Sum of electronic and thermal Enthalpies=    | -660.518056 |
| Sum of electronic and thermal Free Energies= | -660.567729 |

|    |   |   |           |           |           |
|----|---|---|-----------|-----------|-----------|
| 1  | 7 | 0 | -1.313888 | -1.149173 | 0.463148  |
| 2  | 6 | 0 | 0.032602  | -1.535324 | 0.217991  |
| 3  | 6 | 0 | 0.934995  | -0.305545 | 0.460711  |
| 4  | 6 | 0 | 0.389847  | 0.739541  | -0.495368 |
| 5  | 7 | 0 | 1.091983  | 0.922071  | -1.623819 |
| 6  | 1 | 0 | 0.635519  | 1.425576  | -2.369196 |
| 7  | 1 | 0 | 2.095083  | 0.829290  | -1.599040 |
| 8  | 7 | 0 | -0.981292 | 0.951158  | -0.594532 |
| 9  | 6 | 0 | -1.870226 | 0.042333  | -0.029678 |
| 10 | 8 | 0 | -3.064131 | 0.250098  | 0.058726  |
| 11 | 1 | 0 | 0.315259  | -2.305771 | 0.951905  |
| 12 | 6 | 0 | 0.916623  | 0.110748  | 1.919181  |
| 13 | 1 | 0 | -0.066636 | 0.475513  | 2.212447  |
| 14 | 1 | 0 | 1.168932  | -0.757599 | 2.540650  |
| 15 | 1 | 0 | 1.636005  | 0.915022  | 2.076855  |
| 16 | 8 | 0 | 2.262745  | -0.634099 | 0.031626  |
| 17 | 1 | 0 | 2.751485  | -0.886385 | 0.820228  |



|    |   |   |           |           |           |
|----|---|---|-----------|-----------|-----------|
| 18 | 8 | 0 | 0.194604  | -2.029199 | -1.097117 |
| 19 | 1 | 0 | 1.147639  | -2.040177 | -1.247279 |
| 20 | 1 | 0 | -1.998425 | -1.881289 | 0.587743  |
| 21 | 1 | 0 | -0.711037 | 2.020253  | -0.009019 |
| 22 | 8 | 0 | 0.383059  | 2.385429  | 0.499123  |
| 23 | 1 | 0 | 0.815309  | 3.048823  | -0.054765 |

**B-IM1 (EUMP2=-0.66080775667630D+03)**

|                                              |             |
|----------------------------------------------|-------------|
| Sum of electronic and zero-point Energies=   | -660.616845 |
| Sum of electronic and thermal Energies=      | -660.605526 |
| Sum of electronic and thermal Enthalpies=    | -660.604582 |
| Sum of electronic and thermal Free Energies= | -660.652695 |

|   |   |   |           |           |           |
|---|---|---|-----------|-----------|-----------|
| 1 | 7 | 0 | 1.366899  | 1.077494  | 0.374025  |
| 2 | 6 | 0 | -0.003960 | 1.478160  | 0.199488  |
| 3 | 6 | 0 | -0.923892 | 0.278274  | 0.489895  |
| 4 | 6 | 0 | -0.409954 | -0.936027 | -0.306372 |
| 5 | 7 | 0 | -0.485031 | -0.611236 | -1.738385 |
| 6 | 1 | 0 | -0.051310 | -1.371916 | -2.256382 |
| 7 | 1 | 0 | -1.465412 | -0.583584 | -2.011915 |
| 8 | 7 | 0 | 0.944565  | -1.194323 | 0.075280  |
| 9 | 6 | 0 | 1.894176  | -0.184831 | 0.146125  |

|    |   |   |           |           |           |
|----|---|---|-----------|-----------|-----------|
| 10 | 8 | 0 | 3.090910  | -0.399766 | 0.098031  |
| 11 | 1 | 0 | -0.233680 | 2.272752  | 0.915727  |
| 12 | 6 | 0 | -0.991631 | -0.011669 | 1.978969  |
| 13 | 1 | 0 | -0.004301 | -0.250492 | 2.377044  |
| 14 | 1 | 0 | -1.389728 | 0.870730  | 2.486963  |
| 15 | 1 | 0 | -1.658274 | -0.854989 | 2.166359  |
| 16 | 8 | 0 | -2.239221 | 0.568153  | 0.028221  |
| 17 | 1 | 0 | -2.123529 | 1.294785  | -0.601189 |
| 18 | 8 | 0 | -0.281956 | 2.042246  | -1.069986 |
| 19 | 1 | 0 | -0.119990 | 1.303635  | -1.686361 |
| 20 | 1 | 0 | 2.066170  | 1.804678  | 0.317639  |
| 21 | 1 | 0 | 1.323718  | -2.097079 | -0.178725 |
| 22 | 8 | 0 | -1.127215 | -2.106828 | 0.009525  |
| 23 | 1 | 0 | -2.057281 | -1.865953 | -0.080563 |

**B-TS2 (EUMP2= -0.66079052139961D+03)**

Sum of electronic and zero-point Energies= -660.601727

Sum of electronic and thermal Energies= -660.590213

Sum of electronic and thermal Enthalpies= -660.589269

Sum of electronic and thermal Free Energies= -660.637939

|   |   |   |          |          |          |
|---|---|---|----------|----------|----------|
| 1 | 7 | 0 | 1.373897 | 1.066588 | 0.231304 |
|---|---|---|----------|----------|----------|

|    |   |   |           |           |           |
|----|---|---|-----------|-----------|-----------|
| 2  | 6 | 0 | 0.004849  | 1.472518  | 0.249552  |
| 3  | 6 | 0 | -0.894325 | 0.260633  | 0.505315  |
| 4  | 6 | 0 | -0.413735 | -0.931691 | -0.361346 |
| 5  | 7 | 0 | -0.488343 | -0.687541 | -1.796032 |
| 6  | 1 | 0 | -1.171773 | -1.304787 | -2.214148 |
| 7  | 1 | 0 | -0.693540 | 0.278047  | -2.013687 |
| 8  | 7 | 0 | 0.939896  | -1.228563 | 0.055739  |
| 9  | 6 | 0 | 1.889305  | -0.229299 | 0.102513  |
| 10 | 8 | 0 | 3.089362  | -0.425904 | 0.099964  |
| 11 | 1 | 0 | -0.149854 | 2.212494  | 1.043107  |
| 12 | 6 | 0 | -0.878743 | -0.082512 | 1.987451  |
| 13 | 1 | 0 | 0.139667  | -0.234767 | 2.346748  |
| 14 | 1 | 0 | -1.345480 | 0.740471  | 2.535478  |
| 15 | 1 | 0 | -1.447050 | -0.995875 | 2.165908  |
| 16 | 8 | 0 | -2.242288 | 0.549666  | 0.167456  |
| 17 | 1 | 0 | -2.210419 | 1.082692  | -0.635751 |
| 18 | 8 | 0 | -0.412782 | 2.080153  | -0.988598 |
| 19 | 1 | 0 | 0.396841  | 2.348552  | -1.433293 |
| 20 | 1 | 0 | 2.087012  | 1.740613  | 0.468706  |
| 21 | 1 | 0 | 1.313948  | -2.088187 | -0.329128 |
| 22 | 8 | 0 | -1.166647 | -2.078517 | -0.052386 |
| 23 | 1 | 0 | -2.082769 | -1.773711 | -0.083417 |

**B-IM2 (EUMP2= -0.66079776580198D+03)**

|                                              |             |
|----------------------------------------------|-------------|
| Sum of electronic and zero-point Energies=   | -660.607539 |
| Sum of electronic and thermal Energies=      | -660.595865 |
| Sum of electronic and thermal Enthalpies=    | -660.594921 |
| Sum of electronic and thermal Free Energies= | -660.643841 |

|    |   |   |           |           |           |
|----|---|---|-----------|-----------|-----------|
| 1  | 7 | 0 | -1.479492 | -0.946450 | 0.494471  |
| 2  | 6 | 0 | -0.211930 | -1.450503 | 0.081558  |
| 3  | 6 | 0 | 0.888364  | -0.448806 | 0.434597  |
| 4  | 6 | 0 | 0.579810  | 0.922615  | -0.237376 |
| 5  | 7 | 0 | 0.964218  | 1.043395  | -1.630414 |
| 6  | 1 | 0 | 1.936090  | 0.754489  | -1.709129 |
| 7  | 1 | 0 | 0.401811  | 0.408586  | -2.187986 |
| 8  | 7 | 0 | -0.840442 | 1.195417  | -0.140610 |
| 9  | 6 | 0 | -1.880716 | 0.341515  | 0.136510  |
| 10 | 8 | 0 | -3.050676 | 0.677856  | 0.115731  |
| 11 | 1 | 0 | -0.010530 | -2.384769 | 0.618458  |
| 12 | 6 | 0 | 1.007823  | -0.313404 | 1.944319  |
| 13 | 1 | 0 | 0.144832  | 0.205110  | 2.364611  |
| 14 | 1 | 0 | 1.087783  | -1.308989 | 2.390830  |
| 15 | 1 | 0 | 1.910540  | 0.253705  | 2.170510  |

|    |   |   |           |           |           |
|----|---|---|-----------|-----------|-----------|
| 16 | 8 | 0 | 2.125917  | -0.947873 | -0.043600 |
| 17 | 1 | 0 | 1.911204  | -1.388347 | -0.874788 |
| 18 | 8 | 0 | -0.100264 | -1.686148 | -1.333003 |
| 19 | 1 | 0 | -0.635195 | -2.458162 | -1.538358 |
| 20 | 1 | 0 | -2.259457 | -1.587411 | 0.540935  |
| 21 | 1 | 0 | -1.139994 | 2.105853  | -0.462006 |
| 22 | 8 | 0 | 1.324913  | 1.886359  | 0.465078  |
| 23 | 1 | 0 | 1.443703  | 2.603350  | -0.168497 |

**B-TS3 (EUMP2= -0.66073988931902D+03)**

|                                              |             |
|----------------------------------------------|-------------|
| Sum of electronic and zero-point Energies=   | -660.555479 |
| Sum of electronic and thermal Energies=      | -660.543708 |
| Sum of electronic and thermal Enthalpies=    | -660.542763 |
| Sum of electronic and thermal Free Energies= | -660.592349 |

|   |   |   |           |           |           |
|---|---|---|-----------|-----------|-----------|
| 1 | 7 | 0 | -1.491448 | -1.042090 | 0.173750  |
| 2 | 6 | 0 | -0.147672 | -1.473108 | 0.018203  |
| 3 | 6 | 0 | 0.827270  | -0.419413 | 0.545001  |
| 4 | 6 | 0 | 0.535474  | 0.957196  | -0.103106 |
| 5 | 7 | 0 | 1.180758  | 1.050294  | -1.517630 |
| 6 | 1 | 0 | 1.947713  | 0.388685  | -1.612585 |
| 7 | 1 | 0 | 0.536069  | 1.008532  | -2.303433 |

|    |   |   |           |           |           |
|----|---|---|-----------|-----------|-----------|
| 8  | 7 | 0 | -0.899154 | 1.162930  | -0.249042 |
| 9  | 6 | 0 | -1.918953 | 0.268621  | 0.007161  |
| 10 | 8 | 0 | -3.091790 | 0.583239  | 0.087803  |
| 11 | 1 | 0 | -0.009088 | -2.401004 | 0.587597  |
| 12 | 6 | 0 | 0.736317  | -0.271608 | 2.052287  |
| 13 | 1 | 0 | -0.241862 | 0.106657  | 2.356758  |
| 14 | 1 | 0 | 0.921283  | -1.239100 | 2.528014  |
| 15 | 1 | 0 | 1.499812  | 0.444209  | 2.359329  |
| 16 | 8 | 0 | 2.154148  | -0.831102 | 0.226304  |
| 17 | 1 | 0 | 2.053325  | -1.461998 | -0.496528 |
| 18 | 8 | 0 | 0.239952  | -1.696790 | -1.350728 |
| 19 | 1 | 0 | -0.298504 | -2.422322 | -1.679807 |
| 20 | 1 | 0 | -2.235755 | -1.710087 | 0.299963  |
| 21 | 1 | 0 | -1.162831 | 2.129389  | -0.100648 |
| 22 | 8 | 0 | 1.166995  | 2.014572  | 0.414539  |
| 23 | 1 | 0 | 1.509697  | 2.029611  | -0.928826 |

**B-PC (EUMP2= -0.66081462437789D+03)**

|                                              |             |
|----------------------------------------------|-------------|
| Sum of electronic and zero-point Energies=   | -660.628205 |
| Sum of electronic and thermal Energies=      | -660.614453 |
| Sum of electronic and thermal Enthalpies=    | -660.613509 |
| Sum of electronic and thermal Free Energies= | -660.667849 |

|    |   |   |           |           |           |
|----|---|---|-----------|-----------|-----------|
| 1  | 7 | 0 | -1.679931 | 0.540884  | 0.823078  |
| 2  | 6 | 0 | -0.281629 | 0.790949  | 1.084036  |
| 3  | 6 | 0 | 0.477015  | 0.896374  | -0.243835 |
| 4  | 6 | 0 | 0.242741  | -0.414839 | -1.002212 |
| 5  | 7 | 0 | 3.050844  | -1.224234 | 0.601558  |
| 6  | 1 | 0 | 3.010492  | -1.704042 | -0.291862 |
| 7  | 1 | 0 | 3.985567  | -1.342402 | 0.975840  |
| 8  | 7 | 0 | -1.055688 | -0.904871 | -0.888849 |
| 9  | 6 | 0 | -2.054738 | -0.512449 | 0.010466  |
| 10 | 8 | 0 | -3.146687 | -1.041954 | 0.031333  |
| 11 | 1 | 0 | -0.194471 | 1.747994  | 1.610182  |
| 12 | 6 | 0 | -0.077482 | 2.040853  | -1.095668 |
| 13 | 1 | 0 | -1.137998 | 1.921694  | -1.321573 |
| 14 | 1 | 0 | 0.076460  | 2.979441  | -0.555037 |
| 15 | 1 | 0 | 0.499657  | 2.078506  | -2.022484 |
| 16 | 8 | 0 | 1.825023  | 1.170359  | -0.035304 |
| 17 | 1 | 0 | 2.284082  | 0.346300  | 0.254629  |
| 18 | 8 | 0 | 0.334881  | -0.253765 | 1.825150  |
| 19 | 1 | 0 | -0.015633 | -0.210287 | 2.718940  |
| 20 | 1 | 0 | -2.344935 | 0.708335  | 1.566082  |
| 21 | 1 | 0 | -1.274823 | -1.729681 | -1.434001 |
| 22 | 8 | 0 | 1.069613  | -0.972972 | -1.695485 |

|    |   |   |          |           |          |
|----|---|---|----------|-----------|----------|
| 23 | 1 | 0 | 2.406938 | -1.696996 | 1.226500 |
|----|---|---|----------|-----------|----------|

### Path C

#### C-RE (EUMP2=-0.66078558877222D+03)

|                                              |             |
|----------------------------------------------|-------------|
| Sum of electronic and zero-point Energies=   | -660.599471 |
| Sum of electronic and thermal Energies=      | -660.585756 |
| Sum of electronic and thermal Enthalpies=    | -660.584812 |
| Sum of electronic and thermal Free Energies= | -660.640003 |

|    |   |   |           |           |           |
|----|---|---|-----------|-----------|-----------|
| 1  | 7 | 0 | 1.888816  | 0.021769  | 0.769979  |
| 2  | 6 | 0 | 1.170881  | 1.190582  | 0.375011  |
| 3  | 6 | 0 | -0.301680 | 0.800269  | 0.249020  |
| 4  | 6 | 0 | -0.340448 | -0.422405 | -0.653894 |
| 5  | 7 | 0 | -1.482115 | -0.549349 | -1.414516 |
| 6  | 1 | 0 | -1.381927 | -1.237246 | -2.151788 |
| 7  | 1 | 0 | -1.872642 | 0.340202  | -1.700352 |
| 8  | 7 | 0 | 0.555369  | -1.345882 | -0.690393 |
| 9  | 6 | 0 | 1.720902  | -1.194596 | 0.099385  |
| 10 | 8 | 0 | 2.530674  | -2.088472 | 0.208635  |
| 11 | 1 | 0 | 1.276101  | 1.950627  | 1.163280  |
| 12 | 6 | 0 | -0.936528 | 0.483054  | 1.597423  |
| 13 | 1 | 0 | -0.383793 | -0.315100 | 2.096402  |
| 14 | 1 | 0 | -0.897587 | 1.374355  | 2.236289  |



|    |   |   |           |           |           |
|----|---|---|-----------|-----------|-----------|
| 15 | 1 | 0 | -1.975626 | 0.175815  | 1.457202  |
| 16 | 8 | 0 | -0.998019 | 1.860783  | -0.417524 |
| 17 | 1 | 0 | -1.509193 | 2.328345  | 0.249836  |
| 18 | 8 | 0 | 1.657606  | 1.684497  | -0.857647 |
| 19 | 1 | 0 | 0.990531  | 2.314326  | -1.156766 |
| 20 | 1 | 0 | 2.838967  | 0.154602  | 1.090377  |
| 21 | 1 | 0 | -3.108964 | -1.013284 | -0.189333 |
| 22 | 8 | 0 | -3.809477 | -0.995385 | 0.474878  |
| 23 | 1 | 0 | -3.635380 | -1.791213 | 0.980967  |

**C-TS1 (EUMP2=-0.66070632151309D+03)**

|                                              |             |
|----------------------------------------------|-------------|
| Sum of electronic and zero-point Energies=   | -660.522795 |
| Sum of electronic and thermal Energies=      | -660.510764 |
| Sum of electronic and thermal Enthalpies=    | -660.509820 |
| Sum of electronic and thermal Free Energies= | -660.560072 |

|   |   |   |           |           |           |
|---|---|---|-----------|-----------|-----------|
| 1 | 7 | 0 | 1.698214  | 0.743082  | 0.269932  |
| 2 | 6 | 0 | 0.497719  | 1.478399  | 0.085414  |
| 3 | 6 | 0 | -0.645948 | 0.556190  | 0.512921  |
| 4 | 6 | 0 | -0.460762 | -0.684458 | -0.348932 |
| 5 | 7 | 0 | -1.398566 | -0.796108 | -1.519185 |
| 6 | 1 | 0 | -0.860456 | -1.101950 | -2.327123 |

|    |   |   |           |           |           |
|----|---|---|-----------|-----------|-----------|
| 7  | 1 | 0 | -1.885538 | 0.084812  | -1.675348 |
| 8  | 7 | 0 | 0.695258  | -1.223582 | -0.580738 |
| 9  | 6 | 0 | 1.829176  | -0.624586 | -0.023194 |
| 10 | 8 | 0 | 2.892349  | -1.189141 | 0.130240  |
| 11 | 1 | 0 | 0.509504  | 2.362490  | 0.737128  |
| 12 | 6 | 0 | -0.571031 | 0.252649  | 2.001140  |
| 13 | 1 | 0 | 0.310726  | -0.344667 | 2.239177  |
| 14 | 1 | 0 | -0.524116 | 1.193414  | 2.558927  |
| 15 | 1 | 0 | -1.455863 | -0.314780 | 2.294028  |
| 16 | 8 | 0 | -1.865391 | 1.224805  | 0.190051  |
| 17 | 1 | 0 | -2.548974 | 0.756161  | 0.682654  |
| 18 | 8 | 0 | 0.333286  | 1.877833  | -1.274766 |
| 19 | 1 | 0 | -0.455861 | 2.431543  | -1.278482 |
| 20 | 1 | 0 | 2.570370  | 1.232115  | 0.399904  |
| 21 | 1 | 0 | -1.963792 | -1.572018 | -0.910165 |
| 22 | 8 | 0 | -1.772879 | -1.799237 | 0.456686  |
| 23 | 1 | 0 | -1.254188 | -2.574110 | 0.707450  |

**C-IM1 (EUMP2=-0.66078920342015D+03)**

Sum of electronic and zero-point Energies= -660.601881

Sum of electronic and thermal Energies= -660.588610

Sum of electronic and thermal Enthalpies= -660.587666

Sum of electronic and thermal Free Energies= -660.641029

|    |   |   |           |           |           |
|----|---|---|-----------|-----------|-----------|
| 1  | 7 | 0 | -1.710843 | 0.574782  | 0.661312  |
| 2  | 6 | 0 | -0.382414 | 0.853122  | 1.113246  |
| 3  | 6 | 0 | 0.564298  | 0.934485  | -0.093864 |
| 4  | 6 | 0 | 0.209245  | -0.212582 | -1.016051 |
| 5  | 7 | 0 | 2.248503  | -1.865276 | 0.694140  |
| 6  | 1 | 0 | 1.296557  | -2.171212 | 0.876840  |
| 7  | 1 | 0 | 2.822286  | -2.243086 | 1.441649  |
| 8  | 7 | 0 | -0.892320 | -0.866643 | -1.069173 |
| 9  | 6 | 0 | -1.945301 | -0.509335 | -0.185947 |
| 10 | 8 | 0 | -3.012862 | -1.078379 | -0.223344 |
| 11 | 1 | 0 | -0.380917 | 1.825748  | 1.622423  |
| 12 | 6 | 0 | 0.372386  | 2.245519  | -0.850052 |
| 13 | 1 | 0 | -0.673083 | 2.381489  | -1.137002 |
| 14 | 1 | 0 | 0.681800  | 3.067064  | -0.197359 |
| 15 | 1 | 0 | 1.007506  | 2.245676  | -1.738170 |
| 16 | 8 | 0 | 1.902126  | 0.881775  | 0.349109  |
| 17 | 1 | 0 | 2.144903  | -0.068101 | 0.441561  |
| 18 | 8 | 0 | 0.033191  | -0.165775 | 2.012630  |
| 19 | 1 | 0 | 0.958186  | 0.040598  | 2.195290  |
| 20 | 1 | 0 | -2.433272 | 0.650081  | 1.367093  |

|    |   |   |          |           |           |
|----|---|---|----------|-----------|-----------|
| 21 | 1 | 0 | 2.547044 | -2.318152 | -0.163441 |
| 22 | 8 | 0 | 1.180745 | -0.512076 | -1.894467 |
| 23 | 1 | 0 | 0.776723 | -1.181763 | -2.468259 |

**C-TS2 (EUMP2=-0.66074482562771D+03)**

|                                              |             |
|----------------------------------------------|-------------|
| Sum of electronic and zero-point Energies=   | -660.562470 |
| Sum of electronic and thermal Energies=      | -660.549430 |
| Sum of electronic and thermal Enthalpies=    | -660.548486 |
| Sum of electronic and thermal Free Energies= | -660.601541 |

|    |   |   |           |           |           |
|----|---|---|-----------|-----------|-----------|
| 1  | 7 | 0 | -1.907009 | -0.717688 | 0.424649  |
| 2  | 6 | 0 | -0.722059 | -1.380399 | -0.052869 |
| 3  | 6 | 0 | 0.526944  | -0.570558 | 0.337078  |
| 4  | 6 | 0 | 0.222001  | 0.839201  | -0.092989 |
| 5  | 7 | 0 | 3.765607  | 0.510890  | -0.173567 |
| 6  | 1 | 0 | 4.375887  | 0.444467  | -0.981733 |
| 7  | 1 | 0 | 4.366366  | 0.568485  | 0.641816  |
| 8  | 7 | 0 | -0.991036 | 1.353131  | -0.148068 |
| 9  | 6 | 0 | -2.168050 | 0.611781  | 0.077485  |
| 10 | 8 | 0 | -3.276560 | 1.090119  | 0.036781  |
| 11 | 1 | 0 | -0.662740 | -2.361585 | 0.436854  |
| 12 | 6 | 0 | 0.769086  | -0.587959 | 1.846087  |

|    |   |   |           |           |           |
|----|---|---|-----------|-----------|-----------|
| 13 | 1 | 0 | -0.096223 | -0.201312 | 2.389761  |
| 14 | 1 | 0 | 0.961528  | -1.620123 | 2.152068  |
| 15 | 1 | 0 | 1.646957  | 0.018640  | 2.085804  |
| 16 | 8 | 0 | 1.586239  | -1.147650 | -0.383218 |
| 17 | 1 | 0 | 2.402475  | -0.600459 | -0.255117 |
| 18 | 8 | 0 | -0.779344 | -1.518258 | -1.455523 |
| 19 | 1 | 0 | 0.136035  | -1.690997 | -1.715295 |
| 20 | 1 | 0 | -2.752291 | -1.273571 | 0.385039  |
| 21 | 1 | 0 | 3.262301  | 1.390747  | -0.250192 |
| 22 | 8 | 0 | 1.051143  | 1.764992  | -0.422083 |
| 23 | 1 | 0 | -0.132587 | 2.315362  | -0.506509 |

**C-PC (EUMP2=-0.66082280682515D+03)**

Sum of electronic and zero-point Energies= -660.635264

Sum of electronic and thermal Energies= -660.621989

Sum of electronic and thermal Enthalpies= -660.621045

Sum of electronic and thermal Free Energies= -660.674539

|   |   |   |           |           |           |
|---|---|---|-----------|-----------|-----------|
| 1 | 7 | 0 | -1.911278 | -0.751770 | 0.431880  |
| 2 | 6 | 0 | -0.698264 | -1.367935 | -0.031134 |
| 3 | 6 | 0 | 0.504327  | -0.498759 | 0.339827  |
| 4 | 6 | 0 | 0.267266  | 0.916338  | -0.196221 |

|    |   |   |           |           |           |
|----|---|---|-----------|-----------|-----------|
| 5  | 7 | 0 | 3.859954  | 0.447412  | -0.114760 |
| 6  | 1 | 0 | 3.370734  | 1.312276  | -0.327076 |
| 7  | 1 | 0 | 4.402689  | 0.597304  | 0.728776  |
| 8  | 7 | 0 | -1.049482 | 1.329637  | -0.167573 |
| 9  | 6 | 0 | -2.194233 | 0.554348  | 0.082219  |
| 10 | 8 | 0 | -3.305926 | 1.035156  | 0.040307  |
| 11 | 1 | 0 | -0.595216 | -2.336399 | 0.475143  |
| 12 | 6 | 0 | 0.708885  | -0.418973 | 1.852330  |
| 13 | 1 | 0 | -0.155655 | 0.023316  | 2.353462  |
| 14 | 1 | 0 | 0.874343  | -1.428607 | 2.239163  |
| 15 | 1 | 0 | 1.594920  | 0.186203  | 2.065537  |
| 16 | 8 | 0 | 1.589612  | -1.114229 | -0.306828 |
| 17 | 1 | 0 | 2.408347  | -0.575870 | -0.174212 |
| 18 | 8 | 0 | -0.750388 | -1.533738 | -1.432437 |
| 19 | 1 | 0 | 0.172679  | -1.679523 | -1.682574 |
| 20 | 1 | 0 | -2.741377 | -1.329389 | 0.400511  |
| 21 | 1 | 0 | 4.523349  | 0.281579  | -0.864240 |
| 22 | 8 | 0 | 1.161511  | 1.660953  | -0.559719 |
| 23 | 1 | 0 | -1.235513 | 2.276915  | -0.474026 |

## Water-Mediated Deamination Mechanism

## Path A

wA-RC (EUMP2 = -0.73708233191336D+03)

|                                              |             |
|----------------------------------------------|-------------|
| Sum of electronic and zero-point Energies=   | -736.869701 |
| Sum of electronic and thermal Energies=      | -736.853831 |
| Sum of electronic and thermal Enthalpies=    | -736.852886 |
| Sum of electronic and thermal Free Energies= | -736.912282 |

|    |   |   |           |           |           |
|----|---|---|-----------|-----------|-----------|
| 1  | 7 | 0 | 1.423272  | 1.613001  | -0.250878 |
| 2  | 6 | 0 | 2.026588  | 0.497028  | 0.405658  |
| 3  | 6 | 0 | 1.439452  | -0.768451 | -0.216660 |
| 4  | 6 | 0 | -0.074534 | -0.645111 | -0.127428 |
| 5  | 7 | 0 | -0.741891 | -1.791537 | 0.009458  |
| 6  | 1 | 0 | -1.770131 | -1.792759 | 0.064489  |
| 7  | 1 | 0 | -0.207861 | -2.605835 | 0.267935  |
| 8  | 7 | 0 | -0.699746 | 0.493904  | -0.259581 |
| 9  | 6 | 0 | 0.025897  | 1.687504  | -0.347467 |
| 10 | 8 | 0 | -0.531303 | 2.753057  | -0.528631 |
| 11 | 1 | 0 | 3.110896  | 0.523900  | 0.217130  |
| 12 | 6 | 0 | 1.854315  | -0.944961 | -1.672537 |
| 13 | 1 | 0 | 1.534240  | -0.091435 | -2.271747 |
| 14 | 1 | 0 | 2.946985  | -1.020723 | -1.739176 |
| 15 | 1 | 0 | 1.405788  | -1.858389 | -2.072451 |
| 16 | 8 | 0 | 1.828982  | -1.902002 | 0.566021  |

|    |   |   |           |           |           |
|----|---|---|-----------|-----------|-----------|
| 17 | 1 | 0 | 2.673326  | -2.204350 | 0.215915  |
| 18 | 8 | 0 | 1.766156  | 0.528537  | 1.794620  |
| 19 | 1 | 0 | 1.929973  | -0.369835 | 2.106539  |
| 20 | 1 | 0 | 1.831061  | 2.518797  | -0.056766 |
| 21 | 1 | 0 | -2.439614 | 0.924102  | 0.220918  |
| 22 | 8 | 0 | -3.384630 | 0.988545  | 0.463450  |
| 23 | 1 | 0 | -3.689482 | 1.736170  | -0.052904 |
| 24 | 8 | 0 | -3.573380 | -1.672353 | 0.066366  |
| 25 | 1 | 0 | -3.973651 | -1.767377 | -0.799541 |
| 26 | 1 | 0 | -3.699885 | -0.722168 | 0.262671  |

**wA-TS1 (EUMP2= -0.73705565387759D+03)**

|                                              |             |
|----------------------------------------------|-------------|
| Sum of electronic and zero-point Energies=   | -736.850618 |
| Sum of electronic and thermal Energies=      | -736.836842 |
| Sum of electronic and thermal Enthalpies=    | -736.835898 |
| Sum of electronic and thermal Free Energies= | -736.890632 |

|   |   |   |           |           |           |
|---|---|---|-----------|-----------|-----------|
| 1 | 7 | 0 | -1.452979 | 1.574450  | 0.232698  |
| 2 | 6 | 0 | -2.002731 | 0.409319  | -0.383299 |
| 3 | 6 | 0 | -1.335487 | -0.808500 | 0.252390  |
| 4 | 6 | 0 | 0.171059  | -0.646826 | 0.090497  |
| 5 | 7 | 0 | 0.914578  | -1.704399 | -0.107132 |



|    |   |   |           |           |           |
|----|---|---|-----------|-----------|-----------|
| 6  | 1 | 0 | 2.263398  | -1.658758 | -0.121384 |
| 7  | 1 | 0 | 0.342944  | -2.534131 | -0.230574 |
| 8  | 7 | 0 | 0.710221  | 0.573627  | 0.226376  |
| 9  | 6 | 0 | -0.059015 | 1.726470  | 0.288133  |
| 10 | 8 | 0 | 0.446996  | 2.827624  | 0.420157  |
| 11 | 1 | 0 | -3.083271 | 0.380318  | -0.173041 |
| 12 | 6 | 0 | -1.677868 | -0.948879 | 1.730927  |
| 13 | 1 | 0 | -1.337576 | -0.078286 | 2.293046  |
| 14 | 1 | 0 | -2.764701 | -1.034963 | 1.856459  |
| 15 | 1 | 0 | -1.198702 | -1.848097 | 2.128587  |
| 16 | 8 | 0 | -1.722157 | -1.979394 | -0.472468 |
| 17 | 1 | 0 | -2.545334 | -2.287733 | -0.079842 |
| 18 | 8 | 0 | -1.773359 | 0.417689  | -1.779141 |
| 19 | 1 | 0 | -1.884887 | -0.498959 | -2.059947 |
| 20 | 1 | 0 | -1.908245 | 2.450986  | 0.012001  |
| 21 | 1 | 0 | 2.041249  | 0.818224  | -0.098974 |
| 22 | 8 | 0 | 3.113733  | 0.870440  | -0.382013 |
| 23 | 1 | 0 | 3.531527  | 1.491798  | 0.219701  |
| 24 | 8 | 0 | 3.390057  | -1.471702 | -0.112444 |
| 25 | 1 | 0 | 3.719355  | -1.738013 | 0.749679  |
| 26 | 1 | 0 | 3.403606  | -0.274892 | -0.223920 |

**wA-IM1 (EUMP2=-0.73708341052085D+03)**

|                                              |             |
|----------------------------------------------|-------------|
| Sum of electronic and zero-point Energies=   | -736.870417 |
| Sum of electronic and thermal Energies=      | -736.854530 |
| Sum of electronic and thermal Enthalpies=    | -736.853586 |
| Sum of electronic and thermal Free Energies= | -736.912177 |

|    |   |   |           |           |           |
|----|---|---|-----------|-----------|-----------|
| 1  | 7 | 0 | -0.819458 | 1.722855  | 0.256108  |
| 2  | 6 | 0 | -1.844406 | 0.734652  | 0.122852  |
| 3  | 6 | 0 | -1.232063 | -0.632698 | 0.436049  |
| 4  | 6 | 0 | -0.048501 | -0.861308 | -0.485449 |
| 5  | 7 | 0 | 0.353000  | -2.010451 | -0.897654 |
| 6  | 1 | 0 | 2.852240  | -0.225766 | 0.943795  |
| 7  | 1 | 0 | -0.315566 | -2.709313 | -0.573561 |
| 8  | 7 | 0 | 0.664783  | 0.273735  | -0.800414 |
| 9  | 6 | 0 | 0.408257  | 1.564282  | -0.354583 |
| 10 | 8 | 0 | 1.222975  | 2.460188  | -0.478819 |
| 11 | 1 | 0 | -2.623814 | 0.952216  | 0.867691  |
| 12 | 6 | 0 | -0.745301 | -0.734534 | 1.878990  |
| 13 | 1 | 0 | 0.145631  | -0.124188 | 2.043461  |
| 14 | 1 | 0 | -1.537679 | -0.417791 | 2.568011  |
| 15 | 1 | 0 | -0.482739 | -1.777094 | 2.084528  |
| 16 | 8 | 0 | -2.194533 | -1.641973 | 0.130181  |

|    |   |   |           |           |           |
|----|---|---|-----------|-----------|-----------|
| 17 | 1 | 0 | -2.684418 | -1.810371 | 0.941407  |
| 18 | 8 | 0 | -2.384565 | 0.744986  | -1.181669 |
| 19 | 1 | 0 | -2.835476 | -0.103947 | -1.272435 |
| 20 | 1 | 0 | -1.092493 | 2.690020  | 0.356954  |
| 21 | 1 | 0 | 1.594572  | 0.130013  | -1.184723 |
| 22 | 8 | 0 | 2.534205  | 0.380543  | 1.624682  |
| 23 | 1 | 0 | 2.562728  | 1.226879  | 1.170446  |
| 24 | 1 | 0 | 2.266573  | -1.842843 | -0.896291 |
| 25 | 8 | 0 | 3.043852  | -1.270742 | -0.758196 |
| 26 | 1 | 0 | 3.758761  | -1.697161 | -1.232161 |

**wA-TS2 (EUMP2=-0.73702365961472D+03)**

|                                              |             |
|----------------------------------------------|-------------|
| Sum of electronic and zero-point Energies=   | -736.814052 |
| Sum of electronic and thermal Energies=      | -736.800186 |
| Sum of electronic and thermal Enthalpies=    | -736.799242 |
| Sum of electronic and thermal Free Energies= | -736.852919 |

|   |   |   |           |           |           |
|---|---|---|-----------|-----------|-----------|
| 1 | 7 | 0 | -1.564835 | 1.291405  | 0.478839  |
| 2 | 6 | 0 | -1.921599 | 0.006601  | -0.045336 |
| 3 | 6 | 0 | -0.787690 | -0.979332 | 0.280130  |
| 4 | 6 | 0 | 0.469371  | -0.393790 | -0.337171 |
| 5 | 7 | 0 | 1.099523  | -1.072654 | -1.280075 |

|    |   |   |           |           |           |
|----|---|---|-----------|-----------|-----------|
| 6  | 1 | 0 | 2.782078  | -0.231363 | 0.305568  |
| 7  | 1 | 0 | 0.984201  | -2.074326 | -1.211650 |
| 8  | 7 | 0 | 0.623571  | 0.950231  | -0.267080 |
| 9  | 6 | 0 | -0.335627 | 1.862994  | 0.177908  |
| 10 | 8 | 0 | -0.092564 | 3.043401  | 0.294842  |
| 11 | 1 | 0 | -2.828804 | -0.333861 | 0.472820  |
| 12 | 6 | 0 | -0.669009 | -1.206471 | 1.778149  |
| 13 | 1 | 0 | -0.461816 | -0.269719 | 2.294771  |
| 14 | 1 | 0 | -1.624845 | -1.600280 | 2.147542  |
| 15 | 1 | 0 | 0.153455  | -1.894511 | 1.971579  |
| 16 | 8 | 0 | -1.063740 | -2.199328 | -0.408105 |
| 17 | 1 | 0 | -1.336653 | -2.837661 | 0.256909  |
| 18 | 8 | 0 | -2.135910 | 0.083225  | -1.437325 |
| 19 | 1 | 0 | -2.134114 | -0.830656 | -1.748748 |
| 20 | 1 | 0 | -2.299807 | 1.983983  | 0.531882  |
| 21 | 1 | 0 | 1.572060  | 1.288340  | -0.486901 |
| 22 | 8 | 0 | 2.052304  | -0.869089 | 1.139727  |
| 23 | 1 | 0 | 2.020016  | -0.300853 | 1.916382  |
| 24 | 1 | 0 | 2.040473  | -0.692953 | -1.484019 |
| 25 | 8 | 0 | 3.163252  | 0.362522  | -0.599742 |
| 26 | 1 | 0 | 4.106527  | 0.505133  | -0.525174 |

**wA-IM2 (EUMP2=-0.73709034424669D+03)**

|                                              |             |
|----------------------------------------------|-------------|
| Sum of electronic and zero-point Energies=   | -736.873600 |
| Sum of electronic and thermal Energies=      | -736.859397 |
| Sum of electronic and thermal Enthalpies=    | -736.858453 |
| Sum of electronic and thermal Free Energies= | -736.912885 |

|    |   |   |           |           |           |
|----|---|---|-----------|-----------|-----------|
| 1  | 7 | 0 | -1.260538 | 1.605552  | 0.169275  |
| 2  | 6 | 0 | -1.796833 | 0.350040  | -0.286123 |
| 3  | 6 | 0 | -1.006317 | -0.808524 | 0.348812  |
| 4  | 6 | 0 | 0.495222  | -0.588306 | 0.048671  |
| 5  | 7 | 0 | 0.714819  | -0.760118 | -1.373350 |
| 6  | 1 | 0 | 3.161185  | -0.968231 | 0.087820  |
| 7  | 1 | 0 | 0.582997  | -1.746007 | -1.589324 |
| 8  | 7 | 0 | 0.883690  | 0.729256  | 0.488463  |
| 9  | 6 | 0 | 0.097603  | 1.862469  | 0.289748  |
| 10 | 8 | 0 | 0.558402  | 2.987793  | 0.314981  |
| 11 | 1 | 0 | -2.836372 | 0.278391  | 0.047464  |
| 12 | 6 | 0 | -1.271688 | -0.904753 | 1.842285  |
| 13 | 1 | 0 | -0.842190 | -0.057612 | 2.381835  |
| 14 | 1 | 0 | -2.350820 | -0.927286 | 2.013518  |
| 15 | 1 | 0 | -0.858290 | -1.843787 | 2.220902  |
| 16 | 8 | 0 | -1.429693 | -2.021645 | -0.247987 |

|    |   |   |           |           |           |
|----|---|---|-----------|-----------|-----------|
| 17 | 1 | 0 | -1.804878 | -1.759451 | -1.099898 |
| 18 | 8 | 0 | -1.851493 | 0.210286  | -1.694053 |
| 19 | 1 | 0 | -0.917957 | 0.102436  | -1.962695 |
| 20 | 1 | 0 | -1.773187 | 2.431972  | -0.109186 |
| 21 | 1 | 0 | 1.872642  | 0.922570  | 0.349952  |
| 22 | 8 | 0 | 1.316947  | -1.532635 | 0.736381  |
| 23 | 1 | 0 | 1.199901  | -1.349788 | 1.676185  |
| 24 | 1 | 0 | 1.680882  | -0.514437 | -1.583336 |
| 25 | 8 | 0 | 3.523286  | -0.239106 | -0.430523 |
| 26 | 1 | 0 | 4.472762  | -0.294700 | -0.314703 |

**wA-TS3 (EUMP2=-0.73706778816504D+03)**

|                                              |             |
|----------------------------------------------|-------------|
| Sum of electronic and zero-point Energies=   | -736.853379 |
| Sum of electronic and thermal Energies=      | -736.838807 |
| Sum of electronic and thermal Enthalpies=    | -736.837863 |
| Sum of electronic and thermal Free Energies= | -736.893662 |

|   |   |   |           |           |           |
|---|---|---|-----------|-----------|-----------|
| 1 | 7 | 0 | -1.154299 | 1.660028  | 0.275632  |
| 2 | 6 | 0 | -1.808881 | 0.462867  | -0.129204 |
| 3 | 6 | 0 | -1.038421 | -0.759094 | 0.387385  |
| 4 | 6 | 0 | 0.438213  | -0.678421 | -0.094772 |
| 5 | 7 | 0 | 0.621407  | -0.980353 | -1.503503 |

|    |   |   |           |           |           |
|----|---|---|-----------|-----------|-----------|
| 6  | 1 | 0 | 3.188779  | -1.025786 | -0.181854 |
| 7  | 1 | 0 | -0.272072 | -1.043107 | -1.973424 |
| 8  | 7 | 0 | 0.950460  | 0.637427  | 0.252493  |
| 9  | 6 | 0 | 0.233233  | 1.818531  | 0.231271  |
| 10 | 8 | 0 | 0.752743  | 2.918345  | 0.246295  |
| 11 | 1 | 0 | -2.816337 | 0.426835  | 0.295321  |
| 12 | 6 | 0 | -1.114279 | -0.824801 | 1.905990  |
| 13 | 1 | 0 | -0.526004 | -0.032915 | 2.374336  |
| 14 | 1 | 0 | -2.156555 | -0.725800 | 2.220265  |
| 15 | 1 | 0 | -0.757352 | -1.804480 | 2.232780  |
| 16 | 8 | 0 | -1.663880 | -1.929366 | -0.100201 |
| 17 | 1 | 0 | -1.997270 | -1.705663 | -0.976947 |
| 18 | 8 | 0 | -2.013042 | 0.365887  | -1.549957 |
| 19 | 1 | 0 | -1.278927 | 0.836371  | -1.961330 |
| 20 | 1 | 0 | -1.650157 | 2.533111  | 0.158570  |
| 21 | 1 | 0 | 1.926289  | 0.763330  | -0.016941 |
| 22 | 8 | 0 | 1.257118  | -1.630101 | 0.571037  |
| 23 | 1 | 0 | 1.341113  | -1.310781 | 1.476109  |
| 24 | 1 | 0 | 1.056338  | -1.893962 | -1.575523 |
| 25 | 8 | 0 | 3.719016  | -0.238839 | -0.345800 |
| 26 | 1 | 0 | 4.344335  | -0.238751 | 0.381285  |

**wA-IM3 (EUMP2=-0.73708116313071D+03)**

|                                              |             |
|----------------------------------------------|-------------|
| Sum of electronic and zero-point Energies=   | -736.864782 |
| Sum of electronic and thermal Energies=      | -736.850477 |
| Sum of electronic and thermal Enthalpies=    | -736.849533 |
| Sum of electronic and thermal Free Energies= | -736.904038 |

|    |   |   |           |           |           |
|----|---|---|-----------|-----------|-----------|
| 1  | 7 | 0 | 1.240072  | 1.612170  | -0.228101 |
| 2  | 6 | 0 | 1.748294  | 0.403583  | 0.330238  |
| 3  | 6 | 0 | 1.034899  | -0.794958 | -0.297652 |
| 4  | 6 | 0 | -0.507417 | -0.649946 | -0.091758 |
| 5  | 7 | 0 | -0.975209 | -1.036376 | 1.230525  |
| 6  | 1 | 0 | -2.880671 | -0.535904 | 0.973376  |
| 7  | 1 | 0 | -0.446826 | -0.515849 | 1.925087  |
| 8  | 7 | 0 | -0.908284 | 0.705761  | -0.383859 |
| 9  | 6 | 0 | -0.137505 | 1.847982  | -0.302004 |
| 10 | 8 | 0 | -0.595237 | 2.971948  | -0.364834 |
| 11 | 1 | 0 | 2.818658  | 0.329001  | 0.104926  |
| 12 | 6 | 0 | 1.390159  | -0.894026 | -1.773603 |
| 13 | 1 | 0 | 0.932808  | -0.086532 | -2.350118 |
| 14 | 1 | 0 | 2.475401  | -0.840243 | -1.893905 |
| 15 | 1 | 0 | 1.054153  | -1.862930 | -2.148177 |
| 16 | 8 | 0 | 1.497095  | -1.984241 | 0.314780  |



|    |   |   |           |           |           |
|----|---|---|-----------|-----------|-----------|
| 17 | 1 | 0 | 1.622216  | -1.758785 | 1.244143  |
| 18 | 8 | 0 | 1.560201  | 0.279311  | 1.750816  |
| 19 | 1 | 0 | 2.144184  | 0.912499  | 2.178199  |
| 20 | 1 | 0 | 1.756311  | 2.465675  | -0.061976 |
| 21 | 1 | 0 | -1.908017 | 0.862451  | -0.251530 |
| 22 | 8 | 0 | -1.206668 | -1.534521 | -0.944211 |
| 23 | 1 | 0 | -1.115808 | -1.172131 | -1.831164 |
| 24 | 1 | 0 | -0.771855 | -2.025477 | 1.353928  |
| 25 | 8 | 0 | -3.594291 | -0.158780 | 0.432174  |
| 26 | 1 | 0 | -3.635983 | -0.808211 | -0.273866 |

**wA-TS4 (EUMP2=-0.73707844639814D+03)**

Sum of electronic and zero-point Energies= -736.862976

Sum of electronic and thermal Energies= -736.849008

Sum of electronic and thermal Enthalpies= -736.848064

Sum of electronic and thermal Free Energies= -736.902189

|   |   |   |           |           |           |
|---|---|---|-----------|-----------|-----------|
| 1 | 7 | 0 | 1.241048  | 1.612547  | -0.205309 |
| 2 | 6 | 0 | 1.744322  | 0.400463  | 0.351015  |
| 3 | 6 | 0 | 1.042679  | -0.792001 | -0.299428 |
| 4 | 6 | 0 | -0.499998 | -0.652974 | -0.114782 |
| 5 | 7 | 0 | -0.988283 | -1.052299 | 1.204251  |

|    |   |   |           |           |           |
|----|---|---|-----------|-----------|-----------|
| 6  | 1 | 0 | -2.836841 | -0.597864 | 0.917093  |
| 7  | 1 | 0 | -0.471051 | -0.542213 | 1.916376  |
| 8  | 7 | 0 | -0.905568 | 0.705465  | -0.380718 |
| 9  | 6 | 0 | -0.131591 | 1.847286  | -0.302330 |
| 10 | 8 | 0 | -0.593648 | 2.969378  | -0.373350 |
| 11 | 1 | 0 | 2.817562  | 0.330642  | 0.139484  |
| 12 | 6 | 0 | 1.413753  | -0.871987 | -1.771362 |
| 13 | 1 | 0 | 0.955794  | -0.060234 | -2.339102 |
| 14 | 1 | 0 | 2.501332  | -0.815972 | -1.875092 |
| 15 | 1 | 0 | 1.066007  | -1.827378 | -2.163540 |
| 16 | 8 | 0 | 1.495845  | -1.987431 | 0.310867  |
| 17 | 1 | 0 | 1.611648  | -1.768910 | 1.243062  |
| 18 | 8 | 0 | 1.537113  | 0.267922  | 1.768425  |
| 19 | 1 | 0 | 2.116792  | 0.897445  | 2.206775  |
| 20 | 1 | 0 | 1.758107  | 2.465721  | -0.042083 |
| 21 | 1 | 0 | -1.901771 | 0.873485  | -0.243568 |
| 22 | 8 | 0 | -1.124347 | -1.538737 | -1.024117 |
| 23 | 1 | 0 | -1.733081 | -0.999455 | -1.535905 |
| 24 | 1 | 0 | -0.784732 | -2.042945 | 1.315078  |
| 25 | 8 | 0 | -3.552355 | -0.146769 | 0.431864  |
| 26 | 1 | 0 | -4.045997 | -0.871933 | 0.045661  |

**wA-IM4 (EUMP2=-0.73708954665623D+03)**

|                                              |             |
|----------------------------------------------|-------------|
| Sum of electronic and zero-point Energies=   | -736.872777 |
| Sum of electronic and thermal Energies=      | -736.858735 |
| Sum of electronic and thermal Enthalpies=    | -736.857791 |
| Sum of electronic and thermal Free Energies= | -736.911875 |

|    |   |   |           |           |           |
|----|---|---|-----------|-----------|-----------|
| 1  | 7 | 0 | 1.524883  | 1.374796  | -0.107133 |
| 2  | 6 | 0 | 1.817441  | 0.043556  | 0.312777  |
| 3  | 6 | 0 | 0.833106  | -0.920554 | -0.353031 |
| 4  | 6 | 0 | -0.615372 | -0.460864 | -0.084091 |
| 5  | 7 | 0 | -1.051209 | -0.569790 | 1.316170  |
| 6  | 1 | 0 | -2.872401 | -0.064974 | 1.014009  |
| 7  | 1 | 0 | -0.431072 | -0.001054 | 1.889562  |
| 8  | 7 | 0 | -0.733970 | 0.914999  | -0.508768 |
| 9  | 6 | 0 | 0.236405  | 1.876891  | -0.279085 |
| 10 | 8 | 0 | 0.008156  | 3.071727  | -0.313856 |
| 11 | 1 | 0 | 2.829593  | -0.217719 | -0.024221 |
| 12 | 6 | 0 | 1.119233  | -1.016848 | -1.845794 |
| 13 | 1 | 0 | 0.954140  | -0.057524 | -2.338211 |
| 14 | 1 | 0 | 2.158982  | -1.325989 | -1.988608 |
| 15 | 1 | 0 | 0.456585  | -1.755065 | -2.301906 |
| 16 | 8 | 0 | 1.049761  | -2.176009 | 0.286694  |

|    |   |   |           |           |           |
|----|---|---|-----------|-----------|-----------|
| 17 | 1 | 0 | 0.469896  | -2.798648 | -0.166374 |
| 18 | 8 | 0 | 1.768864  | -0.036027 | 1.735541  |
| 19 | 1 | 0 | 1.884889  | -0.973813 | 1.933886  |
| 20 | 1 | 0 | 2.173723  | 2.093670  | 0.182055  |
| 21 | 1 | 0 | -1.676036 | 1.290993  | -0.477569 |
| 22 | 8 | 0 | -1.429947 | -1.311392 | -0.840135 |
| 23 | 1 | 0 | -2.343744 | -1.035664 | -0.649698 |
| 24 | 1 | 0 | -0.894408 | -1.532973 | 1.606108  |
| 25 | 8 | 0 | -3.503788 | 0.100969  | 0.287251  |
| 26 | 1 | 0 | -4.377320 | 0.011498  | 0.670469  |

**wA-TS5 (EUMP2=-0.73705817157268D+03)**

|                                              |             |
|----------------------------------------------|-------------|
| Sum of electronic and zero-point Energies=   | -736.847349 |
| Sum of electronic and thermal Energies=      | -736.834479 |
| Sum of electronic and thermal Enthalpies=    | -736.833535 |
| Sum of electronic and thermal Free Energies= | -736.885564 |

|   |   |   |           |           |           |
|---|---|---|-----------|-----------|-----------|
| 1 | 7 | 0 | -1.837947 | 0.894727  | -0.033119 |
| 2 | 6 | 0 | -1.709937 | -0.489423 | -0.351398 |
| 3 | 6 | 0 | -0.515141 | -1.070904 | 0.405776  |
| 4 | 6 | 0 | 0.731161  | -0.197300 | 0.205923  |
| 5 | 7 | 0 | 1.142987  | -0.188751 | -1.287283 |

|    |   |   |           |           |           |
|----|---|---|-----------|-----------|-----------|
| 6  | 1 | 0 | 2.194522  | 0.291442  | -1.178972 |
| 7  | 1 | 0 | 0.453130  | 0.276628  | -1.875365 |
| 8  | 7 | 0 | 0.405999  | 1.163155  | 0.555412  |
| 9  | 6 | 0 | -0.792361 | 1.777149  | 0.235524  |
| 10 | 8 | 0 | -0.958109 | 2.982069  | 0.258570  |
| 11 | 1 | 0 | -2.619172 | -1.013207 | -0.027388 |
| 12 | 6 | 0 | -0.825804 | -1.201846 | 1.889839  |
| 13 | 1 | 0 | -1.115228 | -0.240128 | 2.316868  |
| 14 | 1 | 0 | -1.641953 | -1.918952 | 2.016943  |
| 15 | 1 | 0 | 0.064631  | -1.559407 | 2.411150  |
| 16 | 8 | 0 | -0.255391 | -2.346497 | -0.174857 |
| 17 | 1 | 0 | 0.527379  | -2.663475 | 0.295458  |
| 18 | 8 | 0 | -1.570383 | -0.642191 | -1.765610 |
| 19 | 1 | 0 | -1.447530 | -1.590155 | -1.901573 |
| 20 | 1 | 0 | -2.668380 | 1.369456  | -0.357455 |
| 21 | 1 | 0 | 1.195597  | 1.792993  | 0.644822  |
| 22 | 8 | 0 | 1.786724  | -0.701283 | 0.868604  |
| 23 | 1 | 0 | 2.673174  | -0.058648 | 0.403251  |
| 24 | 1 | 0 | 1.206496  | -1.160836 | -1.586218 |
| 25 | 8 | 0 | 3.215572  | 0.709439  | -0.380472 |
| 26 | 1 | 0 | 4.125255  | 0.472011  | -0.570457 |

**wA-PC (EUMP2=-0.73710323094342D+03)**

|                                              |             |
|----------------------------------------------|-------------|
| Sum of electronic and zero-point Energies=   | -736.889924 |
| Sum of electronic and thermal Energies=      | -736.873861 |
| Sum of electronic and thermal Enthalpies=    | -736.872917 |
| Sum of electronic and thermal Free Energies= | -736.932445 |

|    |   |   |           |           |           |
|----|---|---|-----------|-----------|-----------|
| 1  | 7 | 0 | 1.332880  | 1.543427  | 0.232619  |
| 2  | 6 | 0 | 1.625506  | 0.199074  | 0.738836  |
| 3  | 6 | 0 | 1.201161  | -0.782484 | -0.363629 |
| 4  | 6 | 0 | -0.255247 | -0.530322 | -0.722037 |
| 5  | 7 | 0 | -1.631033 | -0.812845 | 1.999302  |
| 6  | 1 | 0 | -2.330462 | -0.541659 | 1.310878  |
| 7  | 1 | 0 | -1.973361 | -0.491325 | 2.899868  |
| 8  | 7 | 0 | -0.656945 | 0.770857  | -0.720127 |
| 9  | 6 | 0 | 0.074761  | 1.871491  | -0.211137 |
| 10 | 8 | 0 | -0.401516 | 2.986429  | -0.229655 |
| 11 | 1 | 0 | 2.711752  | 0.137189  | 0.855305  |
| 12 | 6 | 0 | 2.044028  | -0.599503 | -1.631470 |
| 13 | 1 | 0 | 1.958700  | 0.407859  | -2.043921 |
| 14 | 1 | 0 | 3.089686  | -0.801398 | -1.382348 |
| 15 | 1 | 0 | 1.717664  | -1.329042 | -2.378650 |
| 16 | 8 | 0 | 1.329151  | -2.096106 | 0.124151  |

|    |   |   |           |           |           |
|----|---|---|-----------|-----------|-----------|
| 17 | 1 | 0 | 0.607589  | -2.579053 | -0.300789 |
| 18 | 8 | 0 | 1.074523  | -0.056463 | 1.984928  |
| 19 | 1 | 0 | 0.122572  | -0.286822 | 1.892079  |
| 20 | 1 | 0 | 1.740648  | 2.301359  | 0.765896  |
| 21 | 1 | 0 | -1.641308 | 0.954259  | -0.908394 |
| 22 | 8 | 0 | -0.988270 | -1.469956 | -1.033773 |
| 23 | 1 | 0 | -2.807524 | -0.862114 | -0.965264 |
| 24 | 1 | 0 | -1.639776 | -1.827747 | 2.033242  |
| 25 | 8 | 0 | -3.363493 | -0.148727 | -0.618264 |
| 26 | 1 | 0 | -4.214897 | -0.262525 | -1.042930 |

### Path B

#### wB-RC (EUMP2=-0.73707668553981D+03)

|                                              |             |
|----------------------------------------------|-------------|
| Sum of electronic and zero-point Energies=   | -736.864491 |
| Sum of electronic and thermal Energies=      | -736.848252 |
| Sum of electronic and thermal Enthalpies=    | -736.847307 |
| Sum of electronic and thermal Free Energies= | -736.907013 |

|   |   |   |           |           |           |
|---|---|---|-----------|-----------|-----------|
| 1 | 7 | 0 | -1.381092 | 1.435962  | 0.619572  |
| 2 | 6 | 0 | -2.033135 | 0.262169  | 0.135430  |
| 3 | 6 | 0 | -1.030626 | -0.888262 | 0.230830  |
| 4 | 6 | 0 | 0.213966  | -0.429365 | -0.503958 |
| 5 | 7 | 0 | 0.855609  | -1.359194 | -1.217209 |

|    |   |   |           |           |           |
|----|---|---|-----------|-----------|-----------|
| 6  | 1 | 0 | 1.791460  | -1.145438 | -1.545603 |
| 7  | 1 | 0 | 0.527189  | -2.309167 | -1.168112 |
| 8  | 7 | 0 | 0.666081  | 0.792539  | -0.441578 |
| 9  | 6 | 0 | -0.098374 | 1.788123  | 0.183848  |
| 10 | 8 | 0 | 0.337733  | 2.907251  | 0.364497  |
| 11 | 1 | 0 | -2.894347 | 0.047186  | 0.786371  |
| 12 | 6 | 0 | -0.676275 | -1.240184 | 1.671319  |
| 13 | 1 | 0 | -0.355165 | -0.350367 | 2.213977  |
| 14 | 1 | 0 | -1.564642 | -1.643624 | 2.174223  |
| 15 | 1 | 0 | 0.131977  | -1.973991 | 1.693642  |
| 16 | 8 | 0 | -1.551227 | -2.026696 | -0.461661 |
| 17 | 1 | 0 | -2.049582 | -2.536221 | 0.185375  |
| 18 | 8 | 0 | -2.455063 | 0.432497  | -1.203376 |
| 19 | 1 | 0 | -2.600016 | -0.460858 | -1.538893 |
| 20 | 1 | 0 | -1.960916 | 2.243323  | 0.805061  |
| 21 | 1 | 0 | 2.448842  | 0.741625  | -0.900725 |
| 22 | 8 | 0 | 3.250342  | 0.197705  | -1.059196 |
| 23 | 1 | 0 | 3.897853  | 0.798087  | -1.430994 |
| 24 | 1 | 0 | 3.070629  | -0.675673 | 0.677078  |
| 25 | 8 | 0 | 2.667770  | -0.965575 | 1.506654  |
| 26 | 1 | 0 | 2.322757  | -0.136376 | 1.842945  |



**wB-TS1 (EUMP2=-0.73702095531695D+03)**

|                                              |             |
|----------------------------------------------|-------------|
| Sum of electronic and zero-point Energies=   | -736.811416 |
| Sum of electronic and thermal Energies=      | -736.797594 |
| Sum of electronic and thermal Enthalpies=    | -736.796649 |
| Sum of electronic and thermal Free Energies= | -736.845801 |

|    |   |   |           |           |           |
|----|---|---|-----------|-----------|-----------|
| 1  | 7 | 0 | -1.365059 | 1.430922  | 0.533492  |
| 2  | 6 | 0 | -1.903058 | 0.221536  | -0.010913 |
| 3  | 6 | 0 | -0.899873 | -0.909190 | 0.266646  |
| 4  | 6 | 0 | 0.421720  | -0.479133 | -0.353423 |
| 5  | 7 | 0 | 1.004999  | -1.282842 | -1.234915 |
| 6  | 1 | 0 | 1.977952  | -1.019172 | -1.450116 |
| 7  | 1 | 0 | 0.766473  | -2.258984 | -1.139623 |
| 8  | 7 | 0 | 0.695039  | 0.841150  | -0.394396 |
| 9  | 6 | 0 | -0.098650 | 1.854087  | 0.152974  |
| 10 | 8 | 0 | 0.298522  | 2.991330  | 0.264127  |
| 11 | 1 | 0 | -2.833969 | -0.009531 | 0.525672  |
| 12 | 6 | 0 | -0.802067 | -1.199081 | 1.756325  |
| 13 | 1 | 0 | -0.282479 | -0.402090 | 2.281673  |
| 14 | 1 | 0 | -1.817157 | -1.323811 | 2.155764  |
| 15 | 1 | 0 | -0.231305 | -2.116794 | 1.907878  |
| 16 | 8 | 0 | -1.328237 | -2.069837 | -0.453809 |

|    |   |   |           |           |           |
|----|---|---|-----------|-----------|-----------|
| 17 | 1 | 0 | -1.847617 | -2.594847 | 0.163107  |
| 18 | 8 | 0 | -2.144057 | 0.356277  | -1.394202 |
| 19 | 1 | 0 | -2.223913 | -0.545745 | -1.728881 |
| 20 | 1 | 0 | -2.003532 | 2.205828  | 0.653474  |
| 21 | 1 | 0 | 1.685582  | 1.053705  | -0.604211 |
| 22 | 8 | 0 | 3.181587  | 0.042274  | -0.605692 |
| 23 | 1 | 0 | 4.089596  | 0.306808  | -0.459184 |
| 24 | 1 | 0 | 2.716523  | -0.324417 | 0.374487  |
| 25 | 8 | 0 | 1.896898  | -0.717823 | 1.275393  |
| 26 | 1 | 0 | 2.112857  | -1.642655 | 1.434513  |

**wB-IM1 (EUMP2=-0.73709075564845D+03)**

|                                              |             |
|----------------------------------------------|-------------|
| Sum of electronic and zero-point Energies=   | -736.874098 |
| Sum of electronic and thermal Energies=      | -736.859852 |
| Sum of electronic and thermal Enthalpies=    | -736.858908 |
| Sum of electronic and thermal Free Energies= | -736.913559 |

|   |   |   |           |           |           |
|---|---|---|-----------|-----------|-----------|
| 1 | 7 | 0 | -1.208838 | 1.617967  | 0.137366  |
| 2 | 6 | 0 | -1.811647 | 0.366316  | -0.235994 |
| 3 | 6 | 0 | -0.995136 | -0.778607 | 0.384434  |
| 4 | 6 | 0 | 0.486315  | -0.566923 | 0.025879  |
| 5 | 7 | 0 | 0.644374  | -0.632620 | -1.428031 |

|    |   |   |           |           |           |
|----|---|---|-----------|-----------|-----------|
| 6  | 1 | 0 | 1.608357  | -0.386315 | -1.648799 |
| 7  | 1 | 0 | 0.494569  | -1.591343 | -1.735021 |
| 8  | 7 | 0 | 0.917673  | 0.708271  | 0.515059  |
| 9  | 6 | 0 | 0.152509  | 1.848673  | 0.287663  |
| 10 | 8 | 0 | 0.626526  | 2.969014  | 0.308472  |
| 11 | 1 | 0 | -2.827600 | 0.329779  | 0.168584  |
| 12 | 6 | 0 | -1.209897 | -0.851641 | 1.886155  |
| 13 | 1 | 0 | -0.861839 | 0.059212  | 2.375125  |
| 14 | 1 | 0 | -2.277375 | -0.988805 | 2.078876  |
| 15 | 1 | 0 | -0.667583 | -1.702240 | 2.302206  |
| 16 | 8 | 0 | -1.401935 | -2.017623 | -0.187307 |
| 17 | 1 | 0 | -1.828436 | -1.773588 | -1.021703 |
| 18 | 8 | 0 | -1.968099 | 0.185260  | -1.632062 |
| 19 | 1 | 0 | -1.050142 | 0.152089  | -1.963266 |
| 20 | 1 | 0 | -1.708907 | 2.456292  | -0.125286 |
| 21 | 1 | 0 | 1.910054  | 0.880172  | 0.379561  |
| 22 | 8 | 0 | 3.529867  | -0.324091 | -0.432380 |
| 23 | 1 | 0 | 4.401311  | -0.183793 | -0.059120 |
| 24 | 1 | 0 | 3.124572  | -0.997088 | 0.128638  |
| 25 | 8 | 0 | 1.290505  | -1.541394 | 0.688848  |
| 26 | 1 | 0 | 0.862783  | -2.385923 | 0.496059  |

**wB-TS2 (EUMP2=-0.73706936865186D+03)**

|                                              |             |
|----------------------------------------------|-------------|
| Sum of electronic and zero-point Energies=   | -736.855642 |
| Sum of electronic and thermal Energies=      | -736.840792 |
| Sum of electronic and thermal Enthalpies=    | -736.839848 |
| Sum of electronic and thermal Free Energies= | -736.896473 |

|    |   |   |           |           |           |
|----|---|---|-----------|-----------|-----------|
| 1  | 7 | 0 | -1.093809 | 1.651638  | 0.124203  |
| 2  | 6 | 0 | -1.840736 | 0.436058  | 0.097424  |
| 3  | 6 | 0 | -0.936863 | -0.734610 | 0.488802  |
| 4  | 6 | 0 | 0.419657  | -0.600641 | -0.248386 |
| 5  | 7 | 0 | 0.317617  | -0.676319 | -1.696972 |
| 6  | 1 | 0 | 0.765439  | -1.513628 | -2.043910 |
| 7  | 1 | 0 | -0.637465 | -0.611711 | -2.021233 |
| 8  | 7 | 0 | 1.022256  | 0.637708  | 0.185192  |
| 9  | 6 | 0 | 0.300398  | 1.810173  | 0.144086  |
| 10 | 8 | 0 | 0.795402  | 2.920007  | 0.183005  |
| 11 | 1 | 0 | -2.677016 | 0.499995  | 0.803213  |
| 12 | 6 | 0 | -0.756866 | -0.756914 | 1.999396  |
| 13 | 1 | 0 | -0.369804 | 0.194906  | 2.364665  |
| 14 | 1 | 0 | -1.727816 | -0.962246 | 2.458295  |
| 15 | 1 | 0 | -0.058891 | -1.545664 | 2.282105  |
| 16 | 8 | 0 | -1.523678 | -1.976304 | 0.129587  |

|    |   |   |           |           |           |
|----|---|---|-----------|-----------|-----------|
| 17 | 1 | 0 | -1.944683 | -1.837267 | -0.727160 |
| 18 | 8 | 0 | -2.396670 | 0.147888  | -1.200443 |
| 19 | 1 | 0 | -2.415326 | 0.988340  | -1.668221 |
| 20 | 1 | 0 | -1.578957 | 2.519426  | 0.299530  |
| 21 | 1 | 0 | 1.989526  | 0.752176  | -0.114383 |
| 22 | 8 | 0 | 3.808309  | -0.339653 | -0.244690 |
| 23 | 1 | 0 | 4.140409  | -0.173850 | 0.639840  |
| 24 | 1 | 0 | 3.180173  | -1.056677 | -0.101457 |
| 25 | 8 | 0 | 1.284847  | -1.631215 | 0.198254  |
| 26 | 1 | 0 | 0.752744  | -2.435176 | 0.128121  |

**wB-IM2 (EUMP2=-0.73708524915555D+03)**

Sum of electronic and zero-point Energies= -736.868513

Sum of electronic and thermal Energies= -736.854441

Sum of electronic and thermal Enthalpies= -736.853497

Sum of electronic and thermal Free Energies= -736.907611

|   |   |   |           |           |           |
|---|---|---|-----------|-----------|-----------|
| 1 | 7 | 0 | -1.608023 | 1.304494  | 0.207843  |
| 2 | 6 | 0 | -1.803817 | -0.010125 | -0.300188 |
| 3 | 6 | 0 | -0.805602 | -0.974565 | 0.342778  |
| 4 | 6 | 0 | 0.645449  | -0.469214 | 0.088821  |
| 5 | 7 | 0 | 1.178522  | -0.812161 | -1.236849 |

|    |   |   |           |           |           |
|----|---|---|-----------|-----------|-----------|
| 6  | 1 | 0 | 1.122931  | -1.824928 | -1.322783 |
| 7  | 1 | 0 | 0.574290  | -0.402788 | -1.945208 |
| 8  | 7 | 0 | 0.692780  | 0.973252  | 0.221460  |
| 9  | 6 | 0 | -0.335380 | 1.881210  | 0.234086  |
| 10 | 8 | 0 | -0.172834 | 3.086032  | 0.302233  |
| 11 | 1 | 0 | -2.816284 | -0.343526 | -0.044394 |
| 12 | 6 | 0 | -1.085926 | -1.102667 | 1.831211  |
| 13 | 1 | 0 | -0.819155 | -0.188088 | 2.362211  |
| 14 | 1 | 0 | -2.148271 | -1.317416 | 1.981059  |
| 15 | 1 | 0 | -0.493113 | -1.927587 | 2.225560  |
| 16 | 8 | 0 | -0.981021 | -2.258721 | -0.233448 |
| 17 | 1 | 0 | -1.205127 | -2.090756 | -1.156558 |
| 18 | 8 | 0 | -1.618123 | -0.132064 | -1.724099 |
| 19 | 1 | 0 | -2.352507 | 0.320625  | -2.148570 |
| 20 | 1 | 0 | -2.334802 | 1.991421  | 0.063341  |
| 21 | 1 | 0 | 1.617701  | 1.387592  | 0.204510  |
| 22 | 8 | 0 | 1.459798  | -1.092523 | 1.036119  |
| 23 | 1 | 0 | 2.357862  | -0.768699 | 0.855823  |
| 24 | 1 | 0 | 2.936581  | -0.116356 | -0.954772 |
| 25 | 8 | 0 | 3.514231  | 0.266153  | -0.265857 |
| 26 | 1 | 0 | 4.412205  | 0.122557  | -0.567226 |

**wB-TS3 (EUMP2=-0.73704958995781D+03)**

|                                              |             |
|----------------------------------------------|-------------|
| Sum of electronic and zero-point Energies=   | -736.839399 |
| Sum of electronic and thermal Energies=      | -736.826301 |
| Sum of electronic and thermal Enthalpies=    | -736.825357 |
| Sum of electronic and thermal Free Energies= | -736.877949 |

|    |   |   |           |           |           |
|----|---|---|-----------|-----------|-----------|
| 1  | 7 | 0 | -2.036530 | 0.573827  | -0.070157 |
| 2  | 6 | 0 | -1.611337 | -0.755207 | -0.322232 |
| 3  | 6 | 0 | -0.343331 | -1.077601 | 0.472535  |
| 4  | 6 | 0 | 0.765481  | -0.024037 | 0.187568  |
| 5  | 7 | 0 | 1.407240  | -0.334773 | -1.172374 |
| 6  | 1 | 0 | 1.665243  | -1.321674 | -1.150586 |
| 7  | 1 | 0 | 0.759291  | -0.163503 | -1.937940 |
| 8  | 7 | 0 | 0.165489  | 1.306975  | 0.025742  |
| 9  | 6 | 0 | -1.170036 | 1.652090  | 0.056710  |
| 10 | 8 | 0 | -1.570213 | 2.794711  | 0.180918  |
| 11 | 1 | 0 | -2.403734 | -1.446074 | -0.010329 |
| 12 | 6 | 0 | -0.630011 | -1.110544 | 1.962624  |
| 13 | 1 | 0 | -0.896354 | -0.120861 | 2.338800  |
| 14 | 1 | 0 | -1.446474 | -1.811464 | 2.159740  |
| 15 | 1 | 0 | 0.274578  | -1.445714 | 2.469735  |
| 16 | 8 | 0 | 0.112773  | -2.371181 | 0.091258  |

|    |   |   |           |           |           |
|----|---|---|-----------|-----------|-----------|
| 17 | 1 | 0 | -0.231400 | -2.510771 | -0.799123 |
| 18 | 8 | 0 | -1.286616 | -1.015499 | -1.705250 |
| 19 | 1 | 0 | -2.103478 | -0.938204 | -2.207104 |
| 20 | 1 | 0 | -3.010094 | 0.826873  | -0.138007 |
| 21 | 1 | 0 | 0.759684  | 2.050696  | 0.369291  |
| 22 | 8 | 0 | 1.743505  | -0.038123 | 1.092966  |
| 23 | 1 | 0 | 2.694381  | 0.452568  | 0.513477  |
| 24 | 1 | 0 | 2.383441  | 0.306334  | -1.099872 |
| 25 | 8 | 0 | 3.402019  | 0.808925  | -0.382039 |
| 26 | 1 | 0 | 3.525187  | 1.760733  | -0.356613 |

**wB-PC (EUMP2=-0.73710388394841D+03)**

Sum of electronic and zero-point Energies= -736.890119

Sum of electronic and thermal Energies= -736.874234

Sum of electronic and thermal Enthalpies= -736.873289

Sum of electronic and thermal Free Energies= -736.932491

|   |   |   |           |           |           |
|---|---|---|-----------|-----------|-----------|
| 1 | 7 | 0 | 2.153768  | 0.596405  | 0.609016  |
| 2 | 6 | 0 | 0.797930  | 0.962451  | 0.929462  |
| 3 | 6 | 0 | -0.078018 | -0.295481 | 0.892706  |
| 4 | 6 | 0 | 0.037319  | -0.880821 | -0.514807 |
| 5 | 7 | 0 | -2.524808 | 1.816853  | -0.725064 |



|    |   |   |           |           |           |
|----|---|---|-----------|-----------|-----------|
| 6  | 1 | 0 | -3.082887 | 2.619570  | -0.451181 |
| 7  | 1 | 0 | -2.178011 | 2.005902  | -1.661035 |
| 8  | 7 | 0 | 1.316985  | -0.849078 | -1.026672 |
| 9  | 6 | 0 | 2.407834  | -0.084144 | -0.566648 |
| 10 | 8 | 0 | 3.468041  | -0.086654 | -1.152299 |
| 11 | 1 | 0 | 0.780194  | 1.365783  | 1.949651  |
| 12 | 6 | 0 | 0.379956  | -1.339706 | 1.906072  |
| 13 | 1 | 0 | 1.402084  | -1.669128 | 1.716553  |
| 14 | 1 | 0 | 0.320494  | -0.904948 | 2.908032  |
| 15 | 1 | 0 | -0.298985 | -2.194825 | 1.855441  |
| 16 | 8 | 0 | -1.410131 | 0.019204  | 1.216955  |
| 17 | 1 | 0 | -1.757171 | 0.624543  | 0.536069  |
| 18 | 8 | 0 | 0.362669  | 1.924645  | -0.011123 |
| 19 | 1 | 0 | -0.604400 | 1.995153  | 0.031835  |
| 20 | 1 | 0 | 2.856989  | 1.303021  | 0.783437  |
| 21 | 1 | 0 | 1.453392  | -1.272468 | -1.936952 |
| 22 | 8 | 0 | -0.887318 | -1.385936 | -1.131538 |
| 23 | 1 | 0 | -2.803199 | -1.251403 | -0.745484 |
| 24 | 1 | 0 | -3.163516 | 1.021501  | -0.810608 |
| 25 | 8 | 0 | -3.681187 | -0.938123 | -0.487554 |
| 26 | 1 | 0 | -3.633329 | -1.030847 | 0.467048  |

## Path C

### wC-RC (EUMP2=-0.73706922599612D+03)

|                                              |             |
|----------------------------------------------|-------------|
| Sum of electronic and zero-point Energies=   | -736.857059 |
| Sum of electronic and thermal Energies=      | -736.840820 |
| Sum of electronic and thermal Enthalpies=    | -736.839876 |
| Sum of electronic and thermal Free Energies= | -736.899217 |

|    |   |   |           |           |           |
|----|---|---|-----------|-----------|-----------|
| 1  | 7 | 0 | -0.938854 | 1.608703  | 0.460445  |
| 2  | 6 | 0 | -1.774203 | 0.462059  | 0.583009  |
| 3  | 6 | 0 | -0.876041 | -0.773717 | 0.473779  |
| 4  | 6 | 0 | -0.064931 | -0.587536 | -0.795990 |
| 5  | 7 | 0 | 0.279308  | -1.748311 | -1.454853 |
| 6  | 1 | 0 | -0.389438 | -2.498086 | -1.336490 |
| 7  | 1 | 0 | 0.583487  | -1.581026 | -2.407354 |
| 8  | 7 | 0 | 0.378861  | 0.540497  | -1.223298 |
| 9  | 6 | 0 | 0.069466  | 1.706183  | -0.484143 |
| 10 | 8 | 0 | 0.673158  | 2.744742  | -0.665541 |
| 11 | 1 | 0 | -2.244895 | 0.476282  | 1.577341  |
| 12 | 6 | 0 | 0.046848  | -0.936773 | 1.673751  |
| 13 | 1 | 0 | 0.755884  | -0.107638 | 1.741648  |
| 14 | 1 | 0 | -0.550971 | -0.983246 | 2.592849  |
| 15 | 1 | 0 | 0.611277  | -1.867774 | 1.568477  |
| 16 | 8 | 0 | -1.707019 | -1.929614 | 0.291617  |
| 17 | 1 | 0 | -1.844686 | -2.310331 | 1.164757  |

|    |   |   |           |           |           |
|----|---|---|-----------|-----------|-----------|
| 18 | 8 | 0 | -2.758892 | 0.448363  | -0.431774 |
| 19 | 1 | 0 | -3.096547 | -0.455518 | -0.439577 |
| 20 | 1 | 0 | -1.264788 | 2.495594  | 0.815974  |
| 21 | 1 | 0 | 2.821096  | 0.312039  | 0.526599  |
| 22 | 8 | 0 | 2.595189  | 1.064948  | 1.088701  |
| 23 | 1 | 0 | 2.418134  | 1.768001  | 0.457871  |
| 24 | 8 | 0 | 2.998134  | -1.493997 | -0.197145 |
| 25 | 1 | 0 | 2.180476  | -1.802387 | -0.608061 |
| 26 | 1 | 0 | 3.174375  | -2.148969 | 0.480624  |

**wC-TS1 (EUMP2=-0.73699558185038D+03)**

|                                              |             |
|----------------------------------------------|-------------|
| Sum of electronic and zero-point Energies=   | -736.787980 |
| Sum of electronic and thermal Energies=      | -736.773974 |
| Sum of electronic and thermal Enthalpies=    | -736.773030 |
| Sum of electronic and thermal Free Energies= | -736.827839 |

|   |   |   |           |           |           |
|---|---|---|-----------|-----------|-----------|
| 1 | 7 | 0 | 2.233392  | 0.331097  | -0.124920 |
| 2 | 6 | 0 | 1.243466  | 1.338093  | 0.087284  |
| 3 | 6 | 0 | 0.003511  | 0.648466  | 0.670139  |
| 4 | 6 | 0 | -0.292844 | -0.432367 | -0.353753 |
| 5 | 7 | 0 | -1.297686 | -0.068541 | -1.379383 |
| 6 | 1 | 0 | -0.971661 | 0.817821  | -1.774025 |

|    |   |   |           |           |           |
|----|---|---|-----------|-----------|-----------|
| 7  | 1 | 0 | -1.202835 | -0.786835 | -2.100697 |
| 8  | 7 | 0 | 0.621482  | -1.223375 | -0.797885 |
| 9  | 6 | 0 | 1.919131  | -1.025975 | -0.286737 |
| 10 | 8 | 0 | 2.742420  | -1.899331 | -0.124448 |
| 11 | 1 | 0 | 1.623047  | 2.072941  | 0.808614  |
| 12 | 6 | 0 | 0.308845  | 0.114385  | 2.064015  |
| 13 | 1 | 0 | 1.018451  | -0.715619 | 2.041015  |
| 14 | 1 | 0 | 0.730216  | 0.925871  | 2.666587  |
| 15 | 1 | 0 | -0.613375 | -0.249013 | 2.514235  |
| 16 | 8 | 0 | -1.038649 | 1.612538  | 0.706441  |
| 17 | 1 | 0 | -1.777635 | 1.154725  | 1.124577  |
| 18 | 8 | 0 | 0.914410  | 1.991832  | -1.140906 |
| 19 | 1 | 0 | 0.323071  | 2.709561  | -0.882589 |
| 20 | 1 | 0 | 3.181835  | 0.507157  | 0.169608  |
| 21 | 1 | 0 | -2.817873 | -0.993420 | 0.261730  |
| 22 | 8 | 0 | -1.744281 | -1.306761 | 0.804685  |
| 23 | 1 | 0 | -1.513548 | -2.239181 | 0.744904  |
| 24 | 8 | 0 | -3.555885 | -0.451692 | -0.443160 |
| 25 | 1 | 0 | -2.382560 | -0.041272 | -1.013331 |
| 26 | 1 | 0 | -4.134228 | 0.134697  | 0.048101  |

wC-IM1 (EUMP2=-0.73708054111693D+03)

|                                              |             |
|----------------------------------------------|-------------|
| Sum of electronic and zero-point Energies=   | -736.867521 |
| Sum of electronic and thermal Energies=      | -736.851558 |
| Sum of electronic and thermal Enthalpies=    | -736.850614 |
| Sum of electronic and thermal Free Energies= | -736.910431 |

|    |   |   |           |           |           |
|----|---|---|-----------|-----------|-----------|
| 1  | 7 | 0 | -1.788076 | -1.329710 | 0.363671  |
| 2  | 6 | 0 | -0.573191 | -1.777995 | -0.250098 |
| 3  | 6 | 0 | 0.571510  | -0.878261 | 0.217556  |
| 4  | 6 | 0 | 0.097669  | 0.553130  | 0.027393  |
| 5  | 7 | 0 | 3.892947  | 0.281633  | 0.056459  |
| 6  | 1 | 0 | 4.486950  | 0.431871  | -0.752665 |
| 7  | 1 | 0 | 3.455667  | 1.172529  | 0.269397  |
| 8  | 7 | 0 | -1.129064 | 0.951598  | 0.072492  |
| 9  | 6 | 0 | -2.167553 | 0.005177  | 0.260238  |
| 10 | 8 | 0 | -3.319611 | 0.363371  | 0.375235  |
| 11 | 1 | 0 | -0.372019 | -2.804822 | 0.083458  |
| 12 | 6 | 0 | 0.898115  | -1.101167 | 1.693929  |
| 13 | 1 | 0 | 0.020123  | -0.931021 | 2.321614  |
| 14 | 1 | 0 | 1.243844  | -2.131100 | 1.822718  |
| 15 | 1 | 0 | 1.697422  | -0.421823 | 2.003180  |
| 16 | 8 | 0 | 1.654610  | -1.203272 | -0.619550 |
| 17 | 1 | 0 | 2.454239  | -0.696420 | -0.340681 |

|    |   |   |           |           |           |
|----|---|---|-----------|-----------|-----------|
| 18 | 8 | 0 | -0.690571 | -1.723471 | -1.656752 |
| 19 | 1 | 0 | 0.223393  | -1.741714 | -1.970963 |
| 20 | 1 | 0 | -2.582774 | -1.950447 | 0.277843  |
| 21 | 1 | 0 | -1.103757 | 2.894888  | -0.071977 |
| 22 | 8 | 0 | 1.080916  | 1.429252  | -0.149933 |
| 23 | 1 | 0 | 0.657125  | 2.326143  | -0.230269 |
| 24 | 8 | 0 | -0.444972 | 3.596156  | -0.237667 |
| 25 | 1 | 0 | 4.506695  | 0.048367  | 0.829799  |
| 26 | 1 | 0 | -0.719838 | 3.977316  | -1.074577 |

**wC-TS2 (EUMP2=-0.73706711033337D+03)**

|                                              |             |
|----------------------------------------------|-------------|
| Sum of electronic and zero-point Energies=   | -736.859630 |
| Sum of electronic and thermal Energies=      | -736.844892 |
| Sum of electronic and thermal Enthalpies=    | -736.843948 |
| Sum of electronic and thermal Free Energies= | -736.900859 |

|   |   |   |           |           |           |
|---|---|---|-----------|-----------|-----------|
| 1 | 7 | 0 | -1.803658 | -1.271431 | 0.358149  |
| 2 | 6 | 0 | -0.589947 | -1.733211 | -0.249986 |
| 3 | 6 | 0 | 0.573122  | -0.864824 | 0.230796  |
| 4 | 6 | 0 | 0.165841  | 0.586983  | 0.021662  |
| 5 | 7 | 0 | 3.869648  | 0.306816  | 0.043079  |
| 6 | 1 | 0 | 4.503552  | 0.427526  | -0.739904 |

|    |   |   |           |           |           |
|----|---|---|-----------|-----------|-----------|
| 7  | 1 | 0 | 3.349227  | 1.172889  | 0.144829  |
| 8  | 7 | 0 | -1.096079 | 0.972774  | 0.090938  |
| 9  | 6 | 0 | -2.161419 | 0.068426  | 0.257744  |
| 10 | 8 | 0 | -3.307018 | 0.454147  | 0.353704  |
| 11 | 1 | 0 | -0.412298 | -2.767383 | 0.073739  |
| 12 | 6 | 0 | 0.866373  | -1.079785 | 1.715332  |
| 13 | 1 | 0 | -0.009445 | -0.856326 | 2.329181  |
| 14 | 1 | 0 | 1.160131  | -2.122707 | 1.866289  |
| 15 | 1 | 0 | 1.694295  | -0.434421 | 2.022534  |
| 16 | 8 | 0 | 1.658967  | -1.235697 | -0.582230 |
| 17 | 1 | 0 | 2.459867  | -0.721375 | -0.320074 |
| 18 | 8 | 0 | -0.693543 | -1.660998 | -1.657896 |
| 19 | 1 | 0 | 0.223374  | -1.703206 | -1.961741 |
| 20 | 1 | 0 | -2.607415 | -1.877608 | 0.254187  |
| 21 | 1 | 0 | -1.061667 | 2.348404  | -0.073927 |
| 22 | 8 | 0 | 1.092620  | 1.455363  | -0.172423 |
| 23 | 1 | 0 | 0.473508  | 2.526958  | -0.263042 |
| 24 | 8 | 0 | -0.438418 | 3.272810  | -0.238831 |
| 25 | 1 | 0 | 4.444282  | 0.189753  | 0.870591  |
| 26 | 1 | 0 | -0.631458 | 3.609845  | -1.119693 |

wC-PC (EUMP2=-0.73710388242455D+03)

Sum of electronic and zero-point Energies= -736.890975  
Sum of electronic and thermal Energies= -736.874626  
Sum of electronic and thermal Enthalpies= -736.873682  
Sum of electronic and thermal Free Energies= -736.934266

|    |   |   |           |           |           |
|----|---|---|-----------|-----------|-----------|
| 1  | 7 | 0 | -1.697176 | -1.458207 | 0.296671  |
| 2  | 6 | 0 | -0.441926 | -1.787242 | -0.317821 |
| 3  | 6 | 0 | 0.656085  | -0.873293 | 0.226338  |
| 4  | 6 | 0 | 0.210387  | 0.578835  | 0.042047  |
| 5  | 7 | 0 | 3.859317  | 0.545486  | 0.051228  |
| 6  | 1 | 0 | 4.518434  | 0.666402  | -0.710573 |
| 7  | 1 | 0 | 3.270426  | 1.372763  | 0.077000  |
| 8  | 7 | 0 | -1.132125 | 0.808113  | 0.184959  |
| 9  | 6 | 0 | -2.154522 | -0.153746 | 0.271876  |
| 10 | 8 | 0 | -3.318091 | 0.169190  | 0.366931  |
| 11 | 1 | 0 | -0.193879 | -2.823443 | -0.053942 |
| 12 | 6 | 0 | 0.918780  | -1.116077 | 1.712392  |
| 13 | 1 | 0 | 0.027192  | -0.927335 | 2.315117  |
| 14 | 1 | 0 | 1.234905  | -2.154407 | 1.847921  |
| 15 | 1 | 0 | 1.725174  | -0.458608 | 2.050180  |
| 16 | 8 | 0 | 1.779772  | -1.168962 | -0.563548 |
| 17 | 1 | 0 | 2.535808  | -0.592125 | -0.295103 |
| 18 | 8 | 0 | -0.537407 | -1.632956 | -1.718977 |



|    |   |   |           |           |           |
|----|---|---|-----------|-----------|-----------|
| 19 | 1 | 0 | 0.383777  | -1.603776 | -2.012393 |
| 20 | 1 | 0 | -2.451130 | -2.115908 | 0.146114  |
| 21 | 1 | 0 | -1.437970 | 1.782464  | 0.120714  |
| 22 | 8 | 0 | 1.009873  | 1.491071  | -0.155384 |
| 23 | 1 | 0 | 0.003108  | 3.201432  | -0.259730 |
| 24 | 8 | 0 | -0.854013 | 3.647609  | -0.221904 |
| 25 | 1 | 0 | 4.402356  | 0.524546  | 0.907596  |
| 26 | 1 | 0 | -1.002213 | 3.921774  | -1.128839 |

## ***II. Gas Structures of Cis-(5R,6R)-mCg***

### **II.1 At the B3lyp/6-311g(d,p) Level**

#### **(5R,6R)-mCg-RC (E=-739.004932980)**

|                                              |             |
|----------------------------------------------|-------------|
| Sum of electronic and zero-point Energies=   | -738.795809 |
| Sum of electronic and thermal Energies=      | -738.779795 |
| Sum of electronic and thermal Enthalpies=    | -738.778851 |
| Sum of electronic and thermal Free Energies= | -738.838543 |

|   |   |   |           |           |           |
|---|---|---|-----------|-----------|-----------|
| 1 | 7 | 0 | 1.439957  | 1.595755  | 0.196598  |
| 2 | 6 | 0 | 2.092711  | 0.433047  | -0.313481 |
| 3 | 6 | 0 | 1.408512  | -0.814322 | 0.266490  |
| 4 | 6 | 0 | -0.111985 | -0.619536 | 0.092838  |
| 5 | 7 | 0 | -0.807068 | -1.737230 | -0.086170 |

|    |   |   |           |           |           |
|----|---|---|-----------|-----------|-----------|
| 6  | 1 | 0 | -1.837400 | -1.733262 | -0.143242 |
| 7  | 1 | 0 | -0.284740 | -2.590023 | -0.217305 |
| 8  | 7 | 0 | -0.701016 | 0.546087  | 0.169143  |
| 9  | 6 | 0 | 0.048812  | 1.706975  | 0.305471  |
| 10 | 8 | 0 | -0.462620 | 2.789322  | 0.514535  |
| 11 | 1 | 0 | 3.146734  | 0.453925  | -0.017130 |
| 12 | 6 | 0 | 1.738258  | -1.006528 | 1.748130  |
| 13 | 1 | 0 | 1.433676  | -0.142538 | 2.338579  |
| 14 | 1 | 0 | 1.223733  | -1.891955 | 2.124514  |
| 15 | 1 | 0 | 2.813711  | -1.160434 | 1.858944  |
| 16 | 8 | 0 | 1.851043  | -1.979102 | -0.414324 |
| 17 | 1 | 0 | 1.940341  | -1.728642 | -1.345384 |
| 18 | 8 | 0 | 1.997531  | 0.269932  | -1.737520 |
| 19 | 1 | 0 | 2.390536  | 1.032844  | -2.172336 |
| 20 | 1 | 0 | 1.924994  | 2.480690  | 0.204726  |
| 21 | 1 | 0 | -2.448680 | 0.980933  | -0.242823 |
| 22 | 8 | 0 | -3.413089 | 1.040768  | -0.437397 |
| 23 | 1 | 0 | -3.738934 | 1.722968  | 0.156765  |
| 24 | 8 | 0 | -3.647835 | -1.626206 | -0.122172 |
| 25 | 1 | 0 | -3.991746 | -1.752163 | 0.767440  |
| 26 | 1 | 0 | -3.753431 | -0.660163 | -0.291414 |

**(5R,6R)-mCg-TS1 (E=-738.978794586)**

|                                              |             |
|----------------------------------------------|-------------|
| Sum of electronic and zero-point Energies=   | -738.778239 |
| Sum of electronic and thermal Energies=      | -738.764149 |
| Sum of electronic and thermal Enthalpies=    | -738.763205 |
| Sum of electronic and thermal Free Energies= | -738.818525 |

|    |   |   |           |           |           |
|----|---|---|-----------|-----------|-----------|
| 1  | 7 | 0 | 1.467772  | 1.554670  | 0.174618  |
| 2  | 6 | 0 | 2.053733  | 0.345573  | -0.312307 |
| 3  | 6 | 0 | 1.305201  | -0.851763 | 0.293347  |
| 4  | 6 | 0 | -0.207621 | -0.620728 | 0.084082  |
| 5  | 7 | 0 | -0.973760 | -1.657762 | -0.098733 |
| 6  | 1 | 0 | -2.258441 | -1.614201 | -0.163825 |
| 7  | 1 | 0 | -0.442913 | -2.519791 | -0.167643 |
| 8  | 7 | 0 | -0.709382 | 0.622881  | 0.152177  |
| 9  | 6 | 0 | 0.087730  | 1.750740  | 0.252947  |
| 10 | 8 | 0 | -0.375713 | 2.862942  | 0.413465  |
| 11 | 1 | 0 | 3.107102  | 0.315808  | -0.014661 |
| 12 | 6 | 0 | 1.599047  | -1.006423 | 1.787112  |
| 13 | 1 | 0 | 1.300373  | -0.120314 | 2.346793  |
| 14 | 1 | 0 | 1.056222  | -1.870250 | 2.173784  |
| 15 | 1 | 0 | 2.667891  | -1.180087 | 1.928872  |
| 16 | 8 | 0 | 1.720452  | -2.052279 | -0.335860 |
| 17 | 1 | 0 | 1.802478  | -1.848294 | -1.278456 |

|    |   |   |           |           |           |
|----|---|---|-----------|-----------|-----------|
| 18 | 8 | 0 | 1.947285  | 0.160889  | -1.731583 |
| 19 | 1 | 0 | 2.406072  | 0.876990  | -2.181375 |
| 20 | 1 | 0 | 1.999411  | 2.412191  | 0.159768  |
| 21 | 1 | 0 | -1.978940 | 0.858806  | -0.080854 |
| 22 | 8 | 0 | -3.132040 | 0.935351  | -0.339158 |
| 23 | 1 | 0 | -3.563073 | 1.498131  | 0.311060  |
| 24 | 8 | 0 | -3.451246 | -1.433867 | -0.208640 |
| 25 | 1 | 0 | -3.843261 | -1.730821 | 0.618452  |
| 26 | 1 | 0 | -3.443784 | -0.205370 | -0.265231 |

**(5R,6R)-mCg-IM1(E=-738.998609379)**

Sum of electronic and zero-point Energies= -738.788907

Sum of electronic and thermal Energies= -738.772824

Sum of electronic and thermal Enthalpies= -738.771879

Sum of electronic and thermal Free Energies= -738.830997

|   |   |   |           |           |           |
|---|---|---|-----------|-----------|-----------|
| 1 | 7 | 0 | 0.878052  | 1.727806  | 0.152756  |
| 2 | 6 | 0 | 1.884276  | 0.702580  | 0.141550  |
| 3 | 6 | 0 | 1.243488  | -0.659003 | 0.464329  |
| 4 | 6 | 0 | 0.029530  | -0.866643 | -0.455109 |
| 5 | 7 | 0 | -0.400556 | -2.008426 | -0.829185 |
| 6 | 1 | 0 | 0.232300  | -2.735516 | -0.498803 |
| 7 | 7 | 0 | -0.670216 | 0.275199  | -0.793868 |

|    |   |   |           |           |           |
|----|---|---|-----------|-----------|-----------|
| 8  | 6 | 0 | -0.388673 | 1.561693  | -0.362209 |
| 9  | 8 | 0 | -1.202365 | 2.462738  | -0.434171 |
| 10 | 1 | 0 | 2.631723  | 0.943963  | 0.903372  |
| 11 | 6 | 0 | 0.757828  | -0.732017 | 1.916574  |
| 12 | 1 | 0 | -0.134742 | -0.125959 | 2.079488  |
| 13 | 1 | 0 | 0.506024  | -1.770191 | 2.138068  |
| 14 | 1 | 0 | 1.554850  | -0.419512 | 2.595190  |
| 15 | 8 | 0 | 2.189881  | -1.694213 | 0.278124  |
| 16 | 1 | 0 | 2.653473  | -1.496952 | -0.547507 |
| 17 | 8 | 0 | 2.514501  | 0.526282  | -1.129184 |
| 18 | 1 | 0 | 2.984607  | 1.331834  | -1.365893 |
| 19 | 1 | 0 | 1.092821  | 2.664293  | 0.456571  |
| 20 | 1 | 0 | -1.613987 | 0.133442  | -1.148423 |
| 21 | 8 | 0 | -2.676721 | 0.425100  | 1.574887  |
| 22 | 1 | 0 | -2.648096 | 1.269819  | 1.110191  |
| 23 | 1 | 0 | -2.989476 | -0.197173 | 0.900090  |
| 24 | 8 | 0 | -3.077629 | -1.241702 | -0.821887 |
| 25 | 1 | 0 | -2.295237 | -1.829510 | -0.911562 |
| 26 | 1 | 0 | -3.765251 | -1.595885 | -1.391660 |

**(5R,6R)-mCg-TS2(E=-738.947024367)**

Sum of electronic and zero-point Energies= -738.740240

Sum of electronic and thermal Energies= -738.726249

Sum of electronic and thermal Enthalpies= -738.725305

Sum of electronic and thermal Free Energies= -738.779186

|    |   |   |           |           |           |
|----|---|---|-----------|-----------|-----------|
| 1  | 7 | 0 | 1.395895  | 1.428405  | 0.490887  |
| 2  | 6 | 0 | 1.934523  | 0.168617  | 0.060318  |
| 3  | 6 | 0 | 0.886531  | -0.947371 | 0.282800  |
| 4  | 6 | 0 | -0.432746 | -0.457662 | -0.353034 |
| 5  | 7 | 0 | -1.034545 | -1.255891 | -1.222626 |
| 6  | 1 | 0 | -0.849142 | -2.239959 | -1.084954 |
| 7  | 7 | 0 | -0.686794 | 0.877193  | -0.397481 |
| 8  | 6 | 0 | 0.129854  | 1.867122  | 0.140417  |
| 9  | 8 | 0 | -0.237779 | 3.011164  | 0.277964  |
| 10 | 1 | 0 | 2.819743  | -0.053270 | 0.662752  |
| 11 | 6 | 0 | 0.747725  | -1.268612 | 1.770144  |
| 12 | 1 | 0 | 0.560499  | -0.364666 | 2.349031  |
| 13 | 1 | 0 | -0.093097 | -1.941328 | 1.916940  |
| 14 | 1 | 0 | 1.680354  | -1.730063 | 2.103072  |
| 15 | 8 | 0 | 1.310015  | -2.133175 | -0.363440 |
| 16 | 1 | 0 | 1.696956  | -1.862462 | -1.208478 |
| 17 | 8 | 0 | 2.258517  | 0.119146  | -1.331120 |
| 18 | 1 | 0 | 3.009578  | 0.693948  | -1.507967 |
| 19 | 1 | 0 | 2.016817  | 2.167544  | 0.783417  |

|    |   |   |           |           |           |
|----|---|---|-----------|-----------|-----------|
| 20 | 1 | 0 | -1.667118 | 1.121921  | -0.617577 |
| 21 | 8 | 0 | -2.034848 | -0.893869 | 1.180084  |
| 22 | 1 | 0 | -2.038782 | -0.337091 | 1.966878  |
| 23 | 1 | 0 | -2.835465 | -0.342245 | 0.292898  |
| 24 | 8 | 0 | -3.226902 | 0.150998  | -0.649648 |
| 25 | 1 | 0 | -1.997481 | -0.973525 | -1.456515 |
| 26 | 1 | 0 | -4.172086 | 0.306563  | -0.609553 |

**(5R,6R)-mCg-IM2(E=-738.981273516)**

Sum of electronic and zero-point Energies= -738.769556

Sum of electronic and thermal Energies= -738.754548

Sum of electronic and thermal Enthalpies= -738.753604

Sum of electronic and thermal Free Energies= -738.810085

|   |   |   |           |           |           |
|---|---|---|-----------|-----------|-----------|
| 1 | 7 | 0 | 1.335679  | 1.545236  | 0.289665  |
| 2 | 6 | 0 | 1.855456  | 0.281287  | -0.143718 |
| 3 | 6 | 0 | 0.940224  | -0.880004 | 0.327801  |
| 4 | 6 | 0 | -0.565191 | -0.566999 | -0.021813 |
| 5 | 7 | 0 | -0.823339 | -0.903474 | -1.388458 |
| 6 | 1 | 0 | -0.738600 | -1.907417 | -1.505955 |
| 7 | 7 | 0 | -0.881972 | 0.818604  | 0.257176  |
| 8 | 6 | 0 | -0.010982 | 1.885848  | 0.245695  |
| 9 | 8 | 0 | -0.383695 | 3.042243  | 0.279605  |

|    |   |   |           |           |           |
|----|---|---|-----------|-----------|-----------|
| 10 | 1 | 0 | 2.835036  | 0.138584  | 0.324299  |
| 11 | 6 | 0 | 1.138783  | -1.115646 | 1.824199  |
| 12 | 1 | 0 | 0.791211  | -0.266881 | 2.417124  |
| 13 | 1 | 0 | 0.605400  | -2.018622 | 2.121511  |
| 14 | 1 | 0 | 2.198844  | -1.271254 | 2.031381  |
| 15 | 8 | 0 | 1.344869  | -2.062701 | -0.334550 |
| 16 | 1 | 0 | 1.570897  | -1.785654 | -1.234955 |
| 17 | 8 | 0 | 2.005160  | 0.166402  | -1.563372 |
| 18 | 1 | 0 | 2.831791  | 0.586083  | -1.819197 |
| 19 | 1 | 0 | 1.933865  | 2.355415  | 0.218760  |
| 20 | 1 | 0 | -1.850834 | 1.069400  | 0.082056  |
| 21 | 8 | 0 | -1.458954 | -1.367669 | 0.807051  |
| 22 | 1 | 0 | -1.377212 | -1.051672 | 1.715549  |
| 23 | 1 | 0 | -3.222986 | -0.758607 | 0.109558  |
| 24 | 8 | 0 | -3.612703 | -0.070360 | -0.453936 |
| 25 | 1 | 0 | -1.762998 | -0.615486 | -1.645641 |
| 26 | 1 | 0 | -4.534133 | 0.013308  | -0.194525 |

**(5R,6R)-mCg-TS3(E=-738.975003382)**

|                                              |             |
|----------------------------------------------|-------------|
| Sum of electronic and zero-point Energies=   | -738.763623 |
| Sum of electronic and thermal Energies=      | -738.749226 |
| Sum of electronic and thermal Enthalpies=    | -738.748281 |
| Sum of electronic and thermal Free Energies= | -738.804197 |



|    |   |   |           |           |           |
|----|---|---|-----------|-----------|-----------|
| 1  | 7 | 0 | -0.333640 | 1.939699  | -0.135291 |
| 2  | 6 | 0 | -1.203948 | 1.109162  | 0.632496  |
| 3  | 6 | 0 | -1.370213 | -0.265808 | -0.042620 |
| 4  | 6 | 0 | 0.055232  | -0.904445 | -0.391409 |
| 5  | 7 | 0 | 1.034591  | 0.130315  | -0.700417 |
| 6  | 6 | 0 | 0.925673  | 1.494416  | -0.537472 |
| 7  | 8 | 0 | 1.830686  | 2.267528  | -0.772386 |
| 8  | 1 | 0 | -2.185119 | 1.592707  | 0.682747  |
| 9  | 6 | 0 | -2.222754 | -0.127712 | -1.301437 |
| 10 | 1 | 0 | -1.734261 | 0.496507  | -2.051858 |
| 11 | 1 | 0 | -2.409629 | -1.114498 | -1.720733 |
| 12 | 1 | 0 | -3.179698 | 0.327954  | -1.040134 |
| 13 | 8 | 0 | -2.083225 | -1.112039 | 0.852598  |
| 14 | 1 | 0 | -1.887285 | -0.784080 | 1.742565  |
| 15 | 8 | 0 | -0.747330 | 0.833963  | 1.968395  |
| 16 | 1 | 0 | -0.740103 | 1.652258  | 2.474770  |
| 17 | 1 | 0 | -0.351165 | 2.936131  | 0.027043  |
| 18 | 1 | 0 | 2.002732  | -0.186063 | -0.669410 |
| 19 | 1 | 0 | 2.409979  | -1.189559 | 1.161469  |
| 20 | 1 | 0 | 0.078279  | -1.204804 | -2.316709 |
| 21 | 8 | 0 | 3.282062  | -0.980830 | 0.780533  |
| 22 | 1 | 0 | 3.766808  | -1.811213 | 0.796949  |

|    |   |   |           |           |           |
|----|---|---|-----------|-----------|-----------|
| 23 | 8 | 0 | -0.039125 | -1.757460 | -1.535920 |
| 24 | 7 | 0 | 0.521287  | -1.767097 | 0.687331  |
| 25 | 1 | 0 | 0.914664  | -2.591249 | 0.240575  |
| 26 | 1 | 0 | -0.289343 | -2.087490 | 1.208251  |

**(5R,6R)-mCg-IM3(E= -738.986315628)**

Sum of electronic and zero-point Energies= -738.773883

Sum of electronic and thermal Energies= -738.759229

Sum of electronic and thermal Enthalpies= -738.758284

Sum of electronic and thermal Free Energies= -738.813682

|    |   |   |           |           |           |
|----|---|---|-----------|-----------|-----------|
| 1  | 7 | 0 | -1.144322 | 1.681214  | -0.165982 |
| 2  | 6 | 0 | -1.741617 | 0.486427  | 0.332315  |
| 3  | 6 | 0 | -1.084038 | -0.752101 | -0.308428 |
| 4  | 6 | 0 | 0.485726  | -0.675406 | -0.106837 |
| 5  | 7 | 0 | 0.954773  | 0.671194  | -0.374475 |
| 6  | 6 | 0 | 0.235170  | 1.843583  | -0.303694 |
| 7  | 8 | 0 | 0.737620  | 2.943571  | -0.403546 |
| 8  | 1 | 0 | -2.807245 | 0.492215  | 0.084385  |
| 9  | 6 | 0 | -1.460155 | -0.846286 | -1.785532 |
| 10 | 1 | 0 | -1.022938 | -0.035390 | -2.370483 |
| 11 | 1 | 0 | -1.122475 | -1.806196 | -2.176416 |
| 12 | 1 | 0 | -2.545854 | -0.805731 | -1.893206 |

|    |   |   |           |           |           |
|----|---|---|-----------|-----------|-----------|
| 13 | 8 | 0 | -1.591437 | -1.920424 | 0.314939  |
| 14 | 1 | 0 | -1.727377 | -1.700786 | 1.245569  |
| 15 | 8 | 0 | -1.604185 | 0.309764  | 1.762809  |
| 16 | 1 | 0 | -2.116406 | 0.988343  | 2.214003  |
| 17 | 1 | 0 | -1.632685 | 2.558587  | -0.065521 |
| 18 | 1 | 0 | 1.964044  | 0.777740  | -0.259931 |
| 19 | 1 | 0 | 2.872760  | -0.658925 | 0.989017  |
| 20 | 1 | 0 | 1.087688  | -1.216440 | -1.867701 |
| 21 | 8 | 0 | 3.606789  | -0.265090 | 0.478894  |
| 22 | 1 | 0 | 3.725621  | -0.901272 | -0.234455 |
| 23 | 8 | 0 | 1.144200  | -1.579699 | -0.977702 |
| 24 | 7 | 0 | 0.935872  | -1.105279 | 1.213552  |
| 25 | 1 | 0 | 0.704260  | -2.088199 | 1.326783  |
| 26 | 1 | 0 | 0.441938  | -0.576133 | 1.926196  |

**(5R,6R)-mCg-TS4(E= -738.984351110)**

Sum of electronic and zero-point Energies= -738.772700

Sum of electronic and thermal Energies= -738.758461

Sum of electronic and thermal Enthalpies= -738.757517

Sum of electronic and thermal Free Energies= -738.812256

|   |   |   |           |          |           |
|---|---|---|-----------|----------|-----------|
| 1 | 7 | 0 | -1.124266 | 1.693758 | -0.142946 |
| 2 | 6 | 0 | -1.726932 | 0.504546 | 0.364400  |

|    |   |   |           |           |           |
|----|---|---|-----------|-----------|-----------|
| 3  | 6 | 0 | -1.105490 | -0.737784 | -0.302417 |
| 4  | 6 | 0 | 0.467349  | -0.686394 | -0.140030 |
| 5  | 7 | 0 | 0.957239  | 0.655434  | -0.385947 |
| 6  | 6 | 0 | 0.250766  | 1.837446  | -0.310605 |
| 7  | 8 | 0 | 0.770525  | 2.928802  | -0.419482 |
| 8  | 1 | 0 | -2.797973 | 0.528107  | 0.143536  |
| 9  | 6 | 0 | -1.514066 | -0.812635 | -1.770347 |
| 10 | 1 | 0 | -1.085441 | 0.005212  | -2.350013 |
| 11 | 1 | 0 | -1.165872 | -1.756990 | -2.183252 |
| 12 | 1 | 0 | -2.602934 | -0.772745 | -1.849401 |
| 13 | 8 | 0 | -1.613458 | -1.903609 | 0.328770  |
| 14 | 1 | 0 | -1.723433 | -1.686866 | 1.263408  |
| 15 | 8 | 0 | -1.554996 | 0.320782  | 1.790434  |
| 16 | 1 | 0 | -2.048880 | 1.002659  | 2.256741  |
| 17 | 1 | 0 | -1.602034 | 2.576646  | -0.041622 |
| 18 | 1 | 0 | 1.964954  | 0.760185  | -0.264864 |
| 19 | 1 | 0 | 2.830968  | -0.741146 | 0.941002  |
| 20 | 1 | 0 | 1.668779  | -1.094896 | -1.600916 |
| 21 | 8 | 0 | 3.566661  | -0.279272 | 0.486682  |
| 22 | 1 | 0 | 4.087362  | -0.977061 | 0.078514  |
| 23 | 8 | 0 | 1.033351  | -1.589717 | -1.075203 |
| 24 | 7 | 0 | 0.945639  | -1.140678 | 1.171355  |

|    |   |   |          |           |          |
|----|---|---|----------|-----------|----------|
| 25 | 1 | 0 | 0.709311 | -2.124348 | 1.266941 |
| 26 | 1 | 0 | 0.468489 | -0.625314 | 1.907078 |

**(5R,6R)-mCg-IM4(E= -738.991566391)**

Sum of electronic and zero-point Energies= -738.778712

Sum of electronic and thermal Energies= -738.764324

Sum of electronic and thermal Enthalpies= -738.763380

Sum of electronic and thermal Free Energies= -738.818253

|    |   |   |           |           |           |
|----|---|---|-----------|-----------|-----------|
| 1  | 7 | 0 | 1.590539  | 1.339217  | 0.141259  |
| 2  | 6 | 0 | 1.825250  | 0.001089  | -0.285081 |
| 3  | 6 | 0 | 0.816645  | -0.968777 | 0.364578  |
| 4  | 6 | 0 | -0.651520 | -0.459068 | 0.094496  |
| 5  | 7 | 0 | -0.707945 | 0.993637  | 0.214143  |
| 6  | 6 | 0 | 0.317666  | 1.901197  | 0.221528  |
| 7  | 8 | 0 | 0.154666  | 3.102688  | 0.314053  |
| 8  | 1 | 0 | 2.835788  | -0.293831 | 0.012487  |
| 9  | 6 | 0 | 1.092980  | -1.104453 | 1.859120  |
| 10 | 1 | 0 | 0.896121  | -0.173747 | 2.390566  |
| 11 | 1 | 0 | 0.447440  | -1.879378 | 2.266543  |
| 12 | 1 | 0 | 2.135466  | -1.394236 | 2.010939  |
| 13 | 8 | 0 | 0.990828  | -2.255885 | -0.213390 |
| 14 | 1 | 0 | 1.251107  | -2.110569 | -1.132218 |

|    |   |   |           |           |           |
|----|---|---|-----------|-----------|-----------|
| 15 | 8 | 0 | 1.695255  | -0.190412 | -1.717613 |
| 16 | 1 | 0 | 2.402209  | 0.290691  | -2.159258 |
| 17 | 1 | 0 | 2.326715  | 2.025231  | 0.075840  |
| 18 | 1 | 0 | -1.635636 | 1.399621  | 0.220628  |
| 19 | 1 | 0 | -2.960276 | -0.152445 | -0.988444 |
| 20 | 1 | 0 | -2.387760 | -0.773746 | 0.851543  |
| 21 | 8 | 0 | -3.555975 | 0.218793  | -0.300983 |
| 22 | 1 | 0 | -4.460775 | 0.044388  | -0.572903 |
| 23 | 8 | 0 | -1.478764 | -1.071343 | 1.039397  |
| 24 | 7 | 0 | -1.170386 | -0.817812 | -1.240107 |
| 25 | 1 | 0 | -1.114286 | -1.829586 | -1.326384 |
| 26 | 1 | 0 | -0.575774 | -0.408338 | -1.955955 |

**(5R,6R)-mCg-TS5(E= -738.961418554)**

Sum of electronic and zero-point Energies= -738.754325

Sum of electronic and thermal Energies= -738.741065

Sum of electronic and thermal Enthalpies= -738.740121

Sum of electronic and thermal Free Energies= -738.793051

|   |   |   |           |           |           |
|---|---|---|-----------|-----------|-----------|
| 1 | 7 | 0 | 1.926010  | 0.838308  | 0.062706  |
| 2 | 6 | 0 | 1.720613  | -0.525272 | -0.278908 |
| 3 | 6 | 0 | 0.474598  | -1.099064 | 0.427025  |
| 4 | 6 | 0 | -0.764722 | -0.162508 | 0.191431  |

|    |   |   |           |           |           |
|----|---|---|-----------|-----------|-----------|
| 5  | 7 | 0 | -0.359951 | 1.243230  | 0.144496  |
| 6  | 6 | 0 | 0.900567  | 1.780139  | 0.146786  |
| 7  | 8 | 0 | 1.133930  | 2.969317  | 0.230137  |
| 8  | 1 | 0 | 2.599081  | -1.102953 | 0.023687  |
| 9  | 6 | 0 | 0.715374  | -1.261361 | 1.923089  |
| 10 | 1 | 0 | 0.906810  | -0.301981 | 2.404517  |
| 11 | 1 | 0 | -0.175628 | -1.698890 | 2.368728  |
| 12 | 1 | 0 | 1.567259  | -1.925561 | 2.084808  |
| 13 | 8 | 0 | 0.201742  | -2.392453 | -0.112930 |
| 14 | 1 | 0 | 0.610262  | -2.416999 | -0.988185 |
| 15 | 8 | 0 | 1.497377  | -0.746063 | -1.700829 |
| 16 | 1 | 0 | 2.294375  | -0.496950 | -2.180044 |
| 17 | 1 | 0 | 2.846697  | 1.244481  | 0.003838  |
| 18 | 1 | 0 | -1.114295 | 1.905330  | 0.276785  |
| 19 | 1 | 0 | -2.352577 | 0.103693  | -1.146063 |
| 20 | 1 | 0 | -2.668902 | 0.175815  | 0.560218  |
| 21 | 8 | 0 | -3.297514 | 0.783177  | -0.348340 |
| 22 | 1 | 0 | -4.231010 | 0.563111  | -0.395381 |
| 23 | 8 | 0 | -1.761297 | -0.385186 | 1.050395  |
| 24 | 7 | 0 | -1.355432 | -0.458116 | -1.231221 |
| 25 | 1 | 0 | -1.509000 | -1.464194 | -1.276465 |
| 26 | 1 | 0 | -0.719947 | -0.170795 | -1.972308 |

**(5R,6R)-mCg-PC(E= -739.017492602)**

|                                              |             |
|----------------------------------------------|-------------|
| Sum of electronic and zero-point Energies=   | -738.807681 |
| Sum of electronic and thermal Energies=      | -738.791464 |
| Sum of electronic and thermal Enthalpies=    | -738.790520 |
| Sum of electronic and thermal Free Energies= | -738.852215 |

|    |   |   |           |           |           |
|----|---|---|-----------|-----------|-----------|
| 1  | 7 | 0 | -2.069506 | 0.665552  | 0.332245  |
| 2  | 6 | 0 | -1.602653 | -0.678041 | 0.559732  |
| 3  | 6 | 0 | -0.564120 | -1.104947 | -0.519622 |
| 4  | 6 | 0 | 0.389482  | 0.051204  | -0.873125 |
| 5  | 7 | 0 | 0.025207  | 1.308137  | -0.467575 |
| 6  | 6 | 0 | -1.196804 | 1.704019  | 0.107179  |
| 7  | 8 | 0 | -1.440690 | 2.869049  | 0.316435  |
| 8  | 1 | 0 | -2.468169 | -1.346094 | 0.479420  |
| 9  | 6 | 0 | -1.264078 | -1.573149 | -1.797280 |
| 10 | 1 | 0 | -1.950886 | -0.814325 | -2.179754 |
| 11 | 1 | 0 | -0.515075 | -1.801106 | -2.555678 |
| 12 | 1 | 0 | -1.825810 | -2.483469 | -1.577045 |
| 13 | 8 | 0 | 0.188142  | -2.185660 | -0.004128 |
| 14 | 1 | 0 | 0.994312  | -1.833232 | 0.456927  |
| 15 | 8 | 0 | -1.048091 | -0.764062 | 1.861887  |
| 16 | 1 | 0 | -0.585512 | -1.614302 | 1.878416  |



|    |   |   |           |           |           |
|----|---|---|-----------|-----------|-----------|
| 17 | 1 | 0 | -2.881911 | 0.956938  | 0.858162  |
| 18 | 1 | 0 | 0.699834  | 2.052804  | -0.606057 |
| 19 | 1 | 0 | 2.693493  | -0.241544 | 1.084398  |
| 20 | 1 | 0 | 2.790154  | 0.936690  | -0.857474 |
| 21 | 8 | 0 | 3.119811  | 1.484434  | -0.122346 |
| 22 | 1 | 0 | 3.986844  | 1.802389  | -0.388793 |
| 23 | 8 | 0 | 1.430366  | -0.151871 | -1.477350 |
| 24 | 7 | 0 | 2.272269  | -1.058521 | 1.532124  |
| 25 | 1 | 0 | 3.026726  | -1.697841 | 1.764587  |
| 26 | 1 | 0 | 1.872956  | -0.732712 | 2.408044  |

## II.2 At the Mp2/6-311g(d,p) Level

### (5R,6R)-mCg-RC ( EUMP2 = -0.73708682026122D+03 )

Sum of electronic and zero-point Energies= -736.874244

Sum of electronic and thermal Energies= -736.858226

Sum of electronic and thermal Enthalpies= -736.857282

Sum of electronic and thermal Free Energies= -736.917154

|   |   |   |           |           |           |
|---|---|---|-----------|-----------|-----------|
| 1 | 7 | 0 | 1.424502  | 1.591787  | 0.240551  |
| 2 | 6 | 0 | 2.049472  | 0.459212  | -0.360482 |
| 3 | 6 | 0 | 1.431841  | -0.795900 | 0.242832  |
| 4 | 6 | 0 | -0.084330 | -0.636436 | 0.112940  |
| 5 | 7 | 0 | -0.755725 | -1.772034 | -0.055840 |

|    |   |   |           |           |           |
|----|---|---|-----------|-----------|-----------|
| 6  | 1 | 0 | -1.784479 | -1.782505 | -0.092985 |
| 7  | 1 | 0 | -0.212365 | -2.608334 | -0.204691 |
| 8  | 7 | 0 | -0.708583 | 0.510804  | 0.216658  |
| 9  | 6 | 0 | 0.028216  | 1.687959  | 0.337665  |
| 10 | 8 | 0 | -0.503933 | 2.764754  | 0.533831  |
| 11 | 1 | 0 | 3.125340  | 0.485877  | -0.148013 |
| 12 | 6 | 0 | 1.803191  | -0.964313 | 1.709743  |
| 13 | 1 | 0 | 1.457501  | -0.114459 | 2.300390  |
| 14 | 1 | 0 | 1.345603  | -1.881091 | 2.090275  |
| 15 | 1 | 0 | 2.890024  | -1.053711 | 1.794782  |
| 16 | 8 | 0 | 1.891668  | -1.947603 | -0.442296 |
| 17 | 1 | 0 | 1.908478  | -1.687945 | -1.373423 |
| 18 | 8 | 0 | 1.829798  | 0.325675  | -1.766298 |
| 19 | 1 | 0 | 2.237081  | 1.080117  | -2.200240 |
| 20 | 1 | 0 | 1.877953  | 2.492309  | 0.167474  |
| 21 | 1 | 0 | -2.444888 | 0.937628  | -0.246115 |
| 22 | 8 | 0 | -3.394797 | 1.013072  | -0.469405 |
| 23 | 1 | 0 | -3.687107 | 1.740245  | 0.082454  |
| 24 | 8 | 0 | -3.586488 | -1.652486 | -0.075739 |
| 25 | 1 | 0 | -3.984162 | -1.751383 | 0.790903  |
| 26 | 1 | 0 | -3.710658 | -0.701076 | -0.267331 |

**(5R,6R)-mCg-TS1 ( EUMP2=-0.73705984800602D+03 )**

|                                              |             |
|----------------------------------------------|-------------|
| Sum of electronic and zero-point Energies=   | -736.855008 |
| Sum of electronic and thermal Energies=      | -736.841082 |
| Sum of electronic and thermal Enthalpies=    | -736.840138 |
| Sum of electronic and thermal Free Energies= | -736.895285 |

|    |   |   |           |           |           |
|----|---|---|-----------|-----------|-----------|
| 1  | 7 | 0 | 1.458878  | 1.548095  | 0.234186  |
| 2  | 6 | 0 | 2.020254  | 0.369896  | -0.342453 |
| 3  | 6 | 0 | 1.326782  | -0.839567 | 0.271247  |
| 4  | 6 | 0 | -0.180672 | -0.638735 | 0.086877  |
| 5  | 7 | 0 | -0.933142 | -1.688312 | -0.110579 |
| 6  | 1 | 0 | -2.276971 | -1.638165 | -0.135171 |
| 7  | 1 | 0 | -0.363389 | -2.526475 | -0.189362 |
| 8  | 7 | 0 | -0.713791 | 0.591656  | 0.193277  |
| 9  | 6 | 0 | 0.068362  | 1.728119  | 0.284547  |
| 10 | 8 | 0 | -0.410548 | 2.841190  | 0.425185  |
| 11 | 1 | 0 | 3.093729  | 0.336678  | -0.118447 |
| 12 | 6 | 0 | 1.642667  | -0.981156 | 1.753815  |
| 13 | 1 | 0 | 1.285243  | -0.116552 | 2.315078  |
| 14 | 1 | 0 | 1.158007  | -1.885591 | 2.131046  |
| 15 | 1 | 0 | 2.724074  | -1.082025 | 1.885386  |
| 16 | 8 | 0 | 1.768622  | -2.025372 | -0.363638 |

|    |   |   |           |           |           |
|----|---|---|-----------|-----------|-----------|
| 17 | 1 | 0 | 1.789078  | -1.805161 | -1.304447 |
| 18 | 8 | 0 | 1.808024  | 0.228228  | -1.749119 |
| 19 | 1 | 0 | 2.275116  | 0.943968  | -2.188279 |
| 20 | 1 | 0 | 1.958833  | 2.420745  | 0.131406  |
| 21 | 1 | 0 | -2.035218 | 0.838988  | -0.114394 |
| 22 | 8 | 0 | -3.118994 | 0.898879  | -0.385217 |
| 23 | 1 | 0 | -3.529011 | 1.506450  | 0.235615  |
| 24 | 8 | 0 | -3.405799 | -1.445250 | -0.136247 |
| 25 | 1 | 0 | -3.746121 | -1.718385 | 0.719412  |
| 26 | 1 | 0 | -3.411774 | -0.247296 | -0.237952 |

**(5R,6R)-mCg-IM1(EUMP2=-0.73708605614901D+03)**

Sum of electronic and zero-point Energies= -736.873225

Sum of electronic and thermal Energies= -736.857158

Sum of electronic and thermal Enthalpies= -736.856214

Sum of electronic and thermal Free Energies= -736.915241

|   |   |   |           |           |           |
|---|---|---|-----------|-----------|-----------|
| 1 | 7 | 0 | 0.831500  | 1.715568  | 0.200343  |
| 2 | 6 | 0 | 1.853945  | 0.716181  | 0.127292  |
| 3 | 6 | 0 | 1.243173  | -0.640578 | 0.466406  |
| 4 | 6 | 0 | 0.051408  | -0.871187 | -0.455744 |
| 5 | 7 | 0 | -0.355359 | -2.029450 | -0.835156 |
| 6 | 1 | 0 | 0.303100  | -2.719742 | -0.470519 |

|    |   |   |           |           |           |
|----|---|---|-----------|-----------|-----------|
| 7  | 7 | 0 | -0.658107 | 0.258154  | -0.817209 |
| 8  | 6 | 0 | -0.415159 | 1.546229  | -0.365256 |
| 9  | 8 | 0 | -1.237207 | 2.439886  | -0.462845 |
| 10 | 1 | 0 | 2.630693  | 0.958342  | 0.861840  |
| 11 | 6 | 0 | 0.749714  | -0.695776 | 1.908206  |
| 12 | 1 | 0 | -0.152404 | -0.096379 | 2.048553  |
| 13 | 1 | 0 | 0.513530  | -1.737634 | 2.140613  |
| 14 | 1 | 0 | 1.541541  | -0.357962 | 2.583551  |
| 15 | 8 | 0 | 2.206305  | -1.661664 | 0.303583  |
| 16 | 1 | 0 | 2.636334  | -1.468467 | -0.539497 |
| 17 | 8 | 0 | 2.421761  | 0.551258  | -1.167699 |
| 18 | 1 | 0 | 2.882178  | 1.364592  | -1.391820 |
| 19 | 1 | 0 | 1.053230  | 2.666762  | 0.452146  |
| 20 | 1 | 0 | -1.593540 | 0.101944  | -1.184814 |
| 21 | 8 | 0 | -2.593622 | 0.429630  | 1.575984  |
| 22 | 1 | 0 | -2.601991 | 1.257487  | 1.088123  |
| 23 | 1 | 0 | -2.897085 | -0.200708 | 0.911021  |
| 24 | 8 | 0 | -3.039454 | -1.275960 | -0.783880 |
| 25 | 1 | 0 | -2.260696 | -1.855878 | -0.878188 |
| 26 | 1 | 0 | -3.741869 | -1.716679 | -1.263421 |

**(5R,6R)-mCg-TS2 ( EUMP2 =-0.73702541721187D+03 )**

Sum of electronic and zero-point Energies= -736.815744

Sum of electronic and thermal Energies= -736.801982

Sum of electronic and thermal Enthalpies= -736.801038

Sum of electronic and thermal Free Energies= -736.854540

|    |   |   |           |           |           |
|----|---|---|-----------|-----------|-----------|
| 1  | 7 | 0 | 1.384404  | 1.412102  | 0.498491  |
| 2  | 6 | 0 | 1.903459  | 0.168825  | 0.009827  |
| 3  | 6 | 0 | 0.880014  | -0.938703 | 0.290740  |
| 4  | 6 | 0 | -0.438335 | -0.467955 | -0.332455 |
| 5  | 7 | 0 | -1.022497 | -1.267723 | -1.214710 |
| 6  | 1 | 0 | -0.846463 | -2.249821 | -1.047235 |
| 7  | 7 | 0 | -0.691254 | 0.865083  | -0.398674 |
| 8  | 6 | 0 | 0.119956  | 1.859608  | 0.141604  |
| 9  | 8 | 0 | -0.248629 | 3.006510  | 0.273771  |
| 10 | 1 | 0 | 2.826057  | -0.060848 | 0.554355  |
| 11 | 6 | 0 | 0.778696  | -1.204078 | 1.783970  |
| 12 | 1 | 0 | 0.505724  | -0.296199 | 2.321742  |
| 13 | 1 | 0 | 0.013993  | -1.957407 | 1.962224  |
| 14 | 1 | 0 | 1.756579  | -1.555726 | 2.127334  |
| 15 | 8 | 0 | 1.300258  | -2.140653 | -0.319961 |
| 16 | 1 | 0 | 1.633836  | -1.877369 | -1.188229 |
| 17 | 8 | 0 | 2.127063  | 0.131382  | -1.395113 |
| 18 | 1 | 0 | 2.872549  | 0.704948  | -1.592667 |
| 19 | 1 | 0 | 2.023707  | 2.160331  | 0.725824  |

|    |   |   |           |           |           |
|----|---|---|-----------|-----------|-----------|
| 20 | 1 | 0 | -1.681805 | 1.090200  | -0.609923 |
| 21 | 8 | 0 | -1.951302 | -0.891177 | 1.175539  |
| 22 | 1 | 0 | -1.920872 | -0.274580 | 1.914494  |
| 23 | 1 | 0 | -2.725317 | -0.376917 | 0.339347  |
| 24 | 8 | 0 | -3.167055 | 0.123657  | -0.621389 |
| 25 | 1 | 0 | -1.988148 | -0.977276 | -1.436801 |
| 26 | 1 | 0 | -4.109831 | 0.260487  | -0.531107 |

**(5R,6R)-mCg-IM2 ( EUMP2=-0.73707476410194D+03 )**

|                                              |             |
|----------------------------------------------|-------------|
| Sum of electronic and zero-point Energies=   | -736.859257 |
| Sum of electronic and thermal Energies=      | -736.844496 |
| Sum of electronic and thermal Enthalpies=    | -736.843552 |
| Sum of electronic and thermal Free Energies= | -736.899599 |

|   |   |   |           |           |           |
|---|---|---|-----------|-----------|-----------|
| 1 | 7 | 0 | 1.370254  | 1.503644  | 0.341260  |
| 2 | 6 | 0 | 1.838355  | 0.249605  | -0.170912 |
| 3 | 6 | 0 | 0.925931  | -0.888739 | 0.314443  |
| 4 | 6 | 0 | -0.560606 | -0.566436 | -0.012530 |
| 5 | 7 | 0 | -0.823229 | -0.864306 | -1.388742 |
| 6 | 1 | 0 | -0.791139 | -1.873002 | -1.503511 |
| 7 | 7 | 0 | -0.857102 | 0.810138  | 0.302332  |
| 8 | 6 | 0 | 0.027743  | 1.870638  | 0.259017  |
| 9 | 8 | 0 | -0.331687 | 3.033009  | 0.261085  |

|    |   |   |           |           |           |
|----|---|---|-----------|-----------|-----------|
| 10 | 1 | 0 | 2.835827  | 0.062578  | 0.245923  |
| 11 | 6 | 0 | 1.132998  | -1.103606 | 1.806466  |
| 12 | 1 | 0 | 0.742927  | -0.261600 | 2.384475  |
| 13 | 1 | 0 | 0.638010  | -2.030079 | 2.104335  |
| 14 | 1 | 0 | 2.200822  | -1.206656 | 2.014597  |
| 15 | 8 | 0 | 1.309887  | -2.080616 | -0.338808 |
| 16 | 1 | 0 | 1.492709  | -1.799543 | -1.246178 |
| 17 | 8 | 0 | 1.906402  | 0.181373  | -1.591611 |
| 18 | 1 | 0 | 2.737267  | 0.588321  | -1.850920 |
| 19 | 1 | 0 | 1.971926  | 2.304741  | 0.200353  |
| 20 | 1 | 0 | -1.817812 | 1.078595  | 0.106514  |
| 21 | 8 | 0 | -1.444676 | -1.375548 | 0.793789  |
| 22 | 1 | 0 | -1.343622 | -1.057534 | 1.698676  |
| 23 | 1 | 0 | -3.205587 | -0.722779 | 0.107095  |
| 24 | 8 | 0 | -3.591241 | -0.018793 | -0.430827 |
| 25 | 1 | 0 | -1.760317 | -0.546245 | -1.620703 |
| 26 | 1 | 0 | -4.506459 | 0.032692  | -0.152537 |

**(5R,6R)-mCg-TS3 ( EUMP2=-0.73706812008358D+03 )**

|                                              |             |
|----------------------------------------------|-------------|
| Sum of electronic and zero-point Energies=   | -736.853199 |
| Sum of electronic and thermal Energies=      | -736.838913 |
| Sum of electronic and thermal Enthalpies=    | -736.837969 |
| Sum of electronic and thermal Free Energies= | -736.893450 |



|    |   |   |           |           |           |
|----|---|---|-----------|-----------|-----------|
| 1  | 7 | 0 | -0.236541 | 1.931004  | -0.110589 |
| 2  | 6 | 0 | -1.173345 | 1.135385  | 0.609826  |
| 3  | 6 | 0 | -1.372568 | -0.204042 | -0.098705 |
| 4  | 6 | 0 | 0.004436  | -0.917051 | -0.318192 |
| 5  | 7 | 0 | 0.979209  | 0.049133  | -0.797350 |
| 6  | 6 | 0 | 0.989494  | 1.409643  | -0.530062 |
| 7  | 8 | 0 | 1.952953  | 2.120528  | -0.734520 |
| 8  | 1 | 0 | -2.136718 | 1.660947  | 0.625281  |
| 9  | 6 | 0 | -2.066893 | 0.012940  | -1.434845 |
| 10 | 1 | 0 | -1.410564 | 0.518721  | -2.146633 |
| 11 | 1 | 0 | -2.371585 | -0.956448 | -1.831862 |
| 12 | 1 | 0 | -2.961205 | 0.622722  | -1.283003 |
| 13 | 8 | 0 | -2.229458 | -1.008477 | 0.695223  |
| 14 | 1 | 0 | -2.089551 | -0.701261 | 1.600148  |
| 15 | 8 | 0 | -0.791350 | 0.812314  | 1.950950  |
| 16 | 1 | 0 | -0.828963 | 1.622820  | 2.466490  |
| 17 | 1 | 0 | -0.157275 | 2.907293  | 0.140809  |
| 18 | 1 | 0 | 1.930250  | -0.318057 | -0.804180 |
| 19 | 1 | 0 | 2.418870  | -1.058191 | 1.140074  |
| 20 | 1 | 0 | -0.026984 | -1.471658 | -2.157136 |
| 21 | 8 | 0 | 3.263070  | -0.992613 | 0.669981  |

|    |   |   |           |           |           |
|----|---|---|-----------|-----------|-----------|
| 22 | 1 | 0 | 3.700029  | -1.818243 | 0.883684  |
| 23 | 8 | 0 | -0.103549 | -1.925756 | -1.311384 |
| 24 | 7 | 0 | 0.464377  | -1.603384 | 0.881251  |
| 25 | 1 | 0 | 0.804462  | -2.507164 | 0.559042  |
| 26 | 1 | 0 | -0.340158 | -1.807973 | 1.463974  |

**(5R,6R)-mCg-IM3 ( EUMP2=-0.73708116317191D+03 )**

Sum of electronic and zero-point Energies= -736.864779

Sum of electronic and thermal Energies= -736.850475

Sum of electronic and thermal Enthalpies= -736.849531

Sum of electronic and thermal Free Energies= -736.904034

|    |   |   |           |           |           |
|----|---|---|-----------|-----------|-----------|
| 1  | 7 | 0 | -1.240073 | 1.612133  | -0.228490 |
| 2  | 6 | 0 | -1.748159 | 0.403756  | 0.330361  |
| 3  | 6 | 0 | -1.035007 | -0.794938 | -0.297525 |
| 4  | 6 | 0 | 0.507381  | -0.649998 | -0.091879 |
| 5  | 7 | 0 | 0.908268  | 0.705703  | -0.383833 |
| 6  | 6 | 0 | 0.137506  | 1.847915  | -0.302124 |
| 7  | 8 | 0 | 0.595262  | 2.971876  | -0.364893 |
| 8  | 1 | 0 | -2.818595 | 0.329213  | 0.105405  |
| 9  | 6 | 0 | -1.390619 | -0.894254 | -1.773367 |
| 10 | 1 | 0 | -0.933752 | -0.086614 | -2.350053 |
| 11 | 1 | 0 | -1.054345 | -1.863048 | -2.147975 |

|    |   |   |           |           |           |
|----|---|---|-----------|-----------|-----------|
| 12 | 1 | 0 | -2.475918 | -0.840923 | -1.893352 |
| 13 | 8 | 0 | -1.497153 | -1.984091 | 0.315198  |
| 14 | 1 | 0 | -1.622101 | -1.758472 | 1.244547  |
| 15 | 8 | 0 | -1.559624 | 0.279669  | 1.750939  |
| 16 | 1 | 0 | -2.143530 | 0.912842  | 2.178446  |
| 17 | 1 | 0 | -1.755955 | 2.465689  | -0.061597 |
| 18 | 1 | 0 | 1.908047  | 0.862315  | -0.251803 |
| 19 | 1 | 0 | 2.880496  | -0.536132 | 0.973062  |
| 20 | 1 | 0 | 1.115648  | -1.172055 | -1.831372 |
| 21 | 8 | 0 | 3.594230  | -0.158818 | 0.432119  |
| 22 | 1 | 0 | 3.636074  | -0.808042 | -0.274105 |
| 23 | 8 | 0 | 1.206524  | -1.534531 | -0.944456 |
| 24 | 7 | 0 | 0.975299  | -1.036533 | 1.230330  |
| 25 | 1 | 0 | 0.771905  | -2.025626 | 1.353721  |
| 26 | 1 | 0 | 0.447033  | -0.515992 | 1.924973  |

**(5R,6R)-mCg-TS4 ( EUMP2=-0.73707844639520D+03 )**

|                                              |             |
|----------------------------------------------|-------------|
| Sum of electronic and zero-point Energies=   | -736.862976 |
| Sum of electronic and thermal Energies=      | -736.849008 |
| Sum of electronic and thermal Enthalpies=    | -736.848064 |
| Sum of electronic and thermal Free Energies= | -736.902191 |

|   |   |   |           |          |           |
|---|---|---|-----------|----------|-----------|
| 1 | 7 | 0 | -1.241243 | 1.612423 | -0.205160 |
|---|---|---|-----------|----------|-----------|

|    |   |   |           |           |           |
|----|---|---|-----------|-----------|-----------|
| 2  | 6 | 0 | -1.744332 | 0.400275  | 0.351167  |
| 3  | 6 | 0 | -1.042640 | -0.792090 | -0.299386 |
| 4  | 6 | 0 | 0.500042  | -0.652905 | -0.114886 |
| 5  | 7 | 0 | 0.905463  | 0.705617  | -0.380688 |
| 6  | 6 | 0 | 0.131344  | 1.847348  | -0.302309 |
| 7  | 8 | 0 | 0.593251  | 2.969496  | -0.373423 |
| 8  | 1 | 0 | -2.817587 | 0.330372  | 0.139748  |
| 9  | 6 | 0 | -1.413883 | -0.872053 | -1.771282 |
| 10 | 1 | 0 | -0.956137 | -0.060183 | -2.339025 |
| 11 | 1 | 0 | -1.066014 | -1.827349 | -2.163577 |
| 12 | 1 | 0 | -2.501485 | -0.816227 | -1.874863 |
| 13 | 8 | 0 | -1.495619 | -1.987592 | 0.310908  |
| 14 | 1 | 0 | -1.611341 | -1.769146 | 1.243130  |
| 15 | 8 | 0 | -1.536953 | 0.267698  | 1.768549  |
| 16 | 1 | 0 | -2.116207 | 0.897582  | 2.206945  |
| 17 | 1 | 0 | -1.758505 | 2.465519  | -0.042195 |
| 18 | 1 | 0 | 1.901649  | 0.873772  | -0.243602 |
| 19 | 1 | 0 | 2.836932  | -0.597218 | 0.917242  |
| 20 | 1 | 0 | 1.733428  | -0.999251 | -1.535787 |
| 21 | 8 | 0 | 3.552624  | -0.146572 | 0.431869  |
| 22 | 1 | 0 | 4.045535  | -0.872114 | 0.045437  |
| 23 | 8 | 0 | 1.124346  | -1.538515 | -1.024392 |

|    |   |   |          |           |          |
|----|---|---|----------|-----------|----------|
| 24 | 7 | 0 | 0.988492 | -1.052297 | 1.204078 |
| 25 | 1 | 0 | 0.785266 | -2.043027 | 1.314744 |
| 26 | 1 | 0 | 0.471093 | -0.542497 | 1.916289 |

**(5R,6R)-mCg-IM4 ( EUMP2=-0.73708524915700D+03 )**

|                                              |             |
|----------------------------------------------|-------------|
| Sum of electronic and zero-point Energies=   | -736.868512 |
| Sum of electronic and thermal Energies=      | -736.854441 |
| Sum of electronic and thermal Enthalpies=    | -736.853497 |
| Sum of electronic and thermal Free Energies= | -736.907610 |

|    |   |   |           |           |           |
|----|---|---|-----------|-----------|-----------|
| 1  | 7 | 0 | 1.608012  | 1.304500  | 0.208010  |
| 2  | 6 | 0 | 1.803818  | -0.010075 | -0.300151 |
| 3  | 6 | 0 | 0.805622  | -0.974594 | 0.342743  |
| 4  | 6 | 0 | -0.645443 | -0.469224 | 0.088825  |
| 5  | 7 | 0 | -0.692797 | 0.973239  | 0.221625  |
| 6  | 6 | 0 | 0.335358  | 1.881203  | 0.234154  |
| 7  | 8 | 0 | 0.172806  | 3.086027  | 0.302218  |
| 8  | 1 | 0 | 2.816296  | -0.343472 | -0.044409 |
| 9  | 6 | 0 | 1.085955  | -1.102854 | 1.831162  |
| 10 | 1 | 0 | 0.819090  | -0.188367 | 2.362266  |
| 11 | 1 | 0 | 0.493222  | -1.927878 | 2.225407  |
| 12 | 1 | 0 | 2.148317  | -1.317529 | 1.980996  |
| 13 | 8 | 0 | 0.981060  | -2.258684 | -0.233624 |

|    |   |   |           |           |           |
|----|---|---|-----------|-----------|-----------|
| 14 | 1 | 0 | 1.205171  | -2.090628 | -1.156718 |
| 15 | 8 | 0 | 1.618106  | -0.131893 | -1.724076 |
| 16 | 1 | 0 | 2.352601  | 0.320626  | -2.148540 |
| 17 | 1 | 0 | 2.334728  | 1.991459  | 0.063358  |
| 18 | 1 | 0 | -1.617721 | 1.387572  | 0.204621  |
| 19 | 1 | 0 | -2.936595 | -0.116272 | -0.954796 |
| 20 | 1 | 0 | -2.357885 | -0.768817 | 0.855753  |
| 21 | 8 | 0 | -3.514262 | 0.266105  | -0.265818 |
| 22 | 1 | 0 | -4.412239 | 0.122559  | -0.567210 |
| 23 | 8 | 0 | -1.459810 | -1.092629 | 1.036038  |
| 24 | 7 | 0 | -1.178485 | -0.812029 | -1.236901 |
| 25 | 1 | 0 | -1.122903 | -1.824785 | -1.322954 |
| 26 | 1 | 0 | -0.574245 | -0.402580 | -1.945209 |

**(5R,6R)-mCg-TS5 ( EUMP2=-0.73705080032699D+03 )**

|                                              |             |
|----------------------------------------------|-------------|
| Sum of electronic and zero-point Energies=   | -736.839904 |
| Sum of electronic and thermal Energies=      | -736.826972 |
| Sum of electronic and thermal Enthalpies=    | -736.826028 |
| Sum of electronic and thermal Free Energies= | -736.878031 |

|   |   |   |          |           |           |
|---|---|---|----------|-----------|-----------|
| 1 | 7 | 0 | 1.920671 | 0.817334  | 0.126572  |
| 2 | 6 | 0 | 1.699207 | -0.518700 | -0.295447 |
| 3 | 6 | 0 | 0.472512 | -1.103498 | 0.406423  |

|    |   |   |           |           |           |
|----|---|---|-----------|-----------|-----------|
| 4  | 6 | 0 | -0.763176 | -0.190467 | 0.182477  |
| 5  | 7 | 0 | -0.366314 | 1.210993  | 0.148716  |
| 6  | 6 | 0 | 0.889890  | 1.761256  | 0.165270  |
| 7  | 8 | 0 | 1.113537  | 2.955344  | 0.233352  |
| 8  | 1 | 0 | 2.575397  | -1.124404 | -0.035407 |
| 9  | 6 | 0 | 0.717489  | -1.254674 | 1.896335  |
| 10 | 1 | 0 | 0.816490  | -0.280724 | 2.378422  |
| 11 | 1 | 0 | -0.137879 | -1.774967 | 2.327040  |
| 12 | 1 | 0 | 1.626926  | -1.841231 | 2.056573  |
| 13 | 8 | 0 | 0.215436  | -2.398269 | -0.127797 |
| 14 | 1 | 0 | 0.595071  | -2.386177 | -1.014680 |
| 15 | 8 | 0 | 1.440830  | -0.662271 | -1.712249 |
| 16 | 1 | 0 | 2.251067  | -0.429613 | -2.175388 |
| 17 | 1 | 0 | 2.830344  | 1.233888  | -0.009440 |
| 18 | 1 | 0 | -1.128494 | 1.869097  | 0.266983  |
| 19 | 1 | 0 | -2.316968 | 0.121913  | -1.136139 |
| 20 | 1 | 0 | -2.640137 | 0.187483  | 0.540342  |
| 21 | 8 | 0 | -3.219818 | 0.829288  | -0.324639 |
| 22 | 1 | 0 | -4.163323 | 0.657992  | -0.329099 |
| 23 | 8 | 0 | -1.755349 | -0.434953 | 1.040920  |
| 24 | 7 | 0 | -1.345377 | -0.464713 | -1.224997 |
| 25 | 1 | 0 | -1.527531 | -1.466942 | -1.268656 |

|    |   |   |           |           |           |
|----|---|---|-----------|-----------|-----------|
| 26 | 1 | 0 | -0.696427 | -0.188226 | -1.959630 |
|----|---|---|-----------|-----------|-----------|

**(5R,6R)-mCg-PC ( EUMP2=-0.73710004517192D+03 )**

Sum of electronic and zero-point Energies= -736.886467

Sum of electronic and thermal Energies= -736.870528

Sum of electronic and thermal Enthalpies= -736.869583

Sum of electronic and thermal Free Energies= -736.928831

|    |   |   |           |           |           |
|----|---|---|-----------|-----------|-----------|
| 1  | 7 | 0 | -1.827036 | 1.147587  | 0.095306  |
| 2  | 6 | 0 | -1.733803 | -0.231633 | 0.488703  |
| 3  | 6 | 0 | -0.806387 | -1.005074 | -0.468743 |
| 4  | 6 | 0 | 0.441199  | -0.190761 | -0.814900 |
| 5  | 7 | 0 | 0.438310  | 1.132365  | -0.447124 |
| 6  | 6 | 0 | -0.662667 | 1.888225  | -0.012559 |
| 7  | 8 | 0 | -0.579601 | 3.082120  | 0.171637  |
| 8  | 1 | 0 | -2.738282 | -0.668180 | 0.416517  |
| 9  | 6 | 0 | -1.531048 | -1.356558 | -1.760486 |
| 10 | 1 | 0 | -1.940102 | -0.460027 | -2.234953 |
| 11 | 1 | 0 | -0.829810 | -1.848369 | -2.437350 |
| 12 | 1 | 0 | -2.345889 | -2.048193 | -1.528227 |
| 13 | 8 | 0 | -0.412849 | -2.208259 | 0.162624  |
| 14 | 1 | 0 | 0.420881  | -2.007577 | 0.650219  |
| 15 | 8 | 0 | -1.266656 | -0.307213 | 1.823559  |



|    |   |   |           |           |           |
|----|---|---|-----------|-----------|-----------|
| 16 | 1 | 0 | -1.057305 | -1.243871 | 1.935994  |
| 17 | 1 | 0 | -2.548533 | 1.680542  | 0.565441  |
| 18 | 1 | 0 | 1.311908  | 1.642185  | -0.549665 |
| 19 | 1 | 0 | 2.398065  | -0.675130 | 1.207139  |
| 20 | 1 | 0 | 2.963515  | 0.194291  | -0.865495 |
| 21 | 8 | 0 | 3.340084  | 0.804763  | -0.214067 |
| 22 | 1 | 0 | 4.236557  | 0.961538  | -0.513783 |
| 23 | 8 | 0 | 1.397126  | -0.710610 | -1.375927 |
| 24 | 7 | 0 | 1.739996  | -1.260795 | 1.719822  |
| 25 | 1 | 0 | 2.299467  | -1.927116 | 2.243513  |
| 26 | 1 | 0 | 1.302052  | -0.645791 | 2.399916  |

### ***III. Gas Structures of Cis-(5S,6S)-mCg***

#### **III.1 At the B3lyp/6-311g(d,p) Level**

##### **Cg-RC (E=-699.670459881)**

|                                              |             |
|----------------------------------------------|-------------|
| Sum of electronic and zero-point Energies=   | -699.488786 |
| Sum of electronic and thermal Energies=      | -699.474303 |
| Sum of electronic and thermal Enthalpies=    | -699.473359 |
| Sum of electronic and thermal Free Energies= | -699.530026 |

|   |   |   |          |           |           |
|---|---|---|----------|-----------|-----------|
| 1 | 7 | 0 | 1.672102 | 1.435709  | -0.362292 |
| 2 | 6 | 0 | 2.261278 | 0.202769  | 0.053611  |
| 3 | 6 | 0 | 1.444448 | -0.924785 | -0.583793 |

|    |   |   |           |           |           |
|----|---|---|-----------|-----------|-----------|
| 4  | 6 | 0 | -0.034109 | -0.683561 | -0.306015 |
| 5  | 7 | 0 | -0.792476 | -1.769025 | -0.181179 |
| 6  | 1 | 0 | -1.813361 | -1.696976 | -0.043370 |
| 7  | 1 | 0 | -0.330767 | -2.663111 | -0.135619 |
| 8  | 7 | 0 | -0.535877 | 0.518418  | -0.253032 |
| 9  | 6 | 0 | 0.288378  | 1.640377  | -0.334332 |
| 10 | 8 | 0 | -0.170154 | 2.762803  | -0.394702 |
| 11 | 1 | 0 | 3.293393  | 0.165935  | -0.322244 |
| 12 | 8 | 0 | 1.823295  | -2.196706 | -0.056479 |
| 13 | 1 | 0 | 2.574301  | -2.528886 | -0.558184 |
| 14 | 8 | 0 | 2.258091  | 0.078817  | 1.467232  |
| 15 | 1 | 0 | 2.366721  | -0.860286 | 1.668437  |
| 16 | 1 | 0 | 2.198339  | 2.283375  | -0.204986 |
| 17 | 1 | 0 | -2.211702 | 1.038024  | 0.344796  |
| 18 | 8 | 0 | -3.149189 | 1.132328  | 0.631237  |
| 19 | 1 | 0 | -3.471108 | 1.909570  | 0.165828  |
| 20 | 8 | 0 | -3.602005 | -1.461833 | 0.077559  |
| 21 | 1 | 0 | -4.011416 | -1.468979 | -0.793023 |
| 22 | 1 | 0 | -3.623876 | -0.513563 | 0.349614  |
| 23 | 1 | 0 | 1.582952  | -0.892894 | -1.671323 |

**Cg-TS1(E=-699.644921355)**

|                                              |             |
|----------------------------------------------|-------------|
| Sum of electronic and zero-point Energies=   | -699.471483 |
| Sum of electronic and thermal Energies=      | -699.458977 |
| Sum of electronic and thermal Enthalpies=    | -699.458033 |
| Sum of electronic and thermal Free Energies= | -699.510237 |

|    |   |   |           |           |           |
|----|---|---|-----------|-----------|-----------|
| 1  | 7 | 0 | 1.692918  | 1.381835  | -0.350428 |
| 2  | 6 | 0 | 2.210025  | 0.105425  | 0.030122  |
| 3  | 6 | 0 | 1.316977  | -0.958491 | -0.613798 |
| 4  | 6 | 0 | -0.146768 | -0.676452 | -0.286035 |
| 5  | 7 | 0 | -0.973331 | -1.673628 | -0.140236 |
| 6  | 1 | 0 | -2.257872 | -1.535949 | 0.022828  |
| 7  | 1 | 0 | -0.509835 | -2.573993 | -0.176432 |
| 8  | 7 | 0 | -0.548042 | 0.597809  | -0.213468 |
| 9  | 6 | 0 | 0.329303  | 1.672873  | -0.276285 |
| 10 | 8 | 0 | -0.067881 | 2.820920  | -0.289414 |
| 11 | 1 | 0 | 3.231223  | 0.015136  | -0.366160 |
| 12 | 8 | 0 | 1.654225  | -2.260164 | -0.137922 |
| 13 | 1 | 0 | 2.372057  | -2.609056 | -0.675226 |
| 14 | 8 | 0 | 2.224586  | -0.048083 | 1.440622  |
| 15 | 1 | 0 | 2.269299  | -0.997144 | 1.618894  |
| 16 | 1 | 0 | 2.272956  | 2.192009  | -0.185766 |
| 17 | 1 | 0 | -1.792559 | 0.912780  | 0.156499  |

|    |   |   |           |           |           |
|----|---|---|-----------|-----------|-----------|
| 18 | 8 | 0 | -2.894512 | 1.041828  | 0.508548  |
| 19 | 1 | 0 | -3.319243 | 1.711764  | -0.035733 |
| 20 | 8 | 0 | -3.413069 | -1.268903 | 0.162220  |
| 21 | 1 | 0 | -3.874067 | -1.448559 | -0.663177 |
| 22 | 1 | 0 | -3.303540 | -0.057803 | 0.340185  |
| 23 | 1 | 0 | 1.426762  | -0.896204 | -1.703440 |

**Cg-IM1(E=-699.664740746)**

Sum of electronic and zero-point Energies= -699.483203

Sum of electronic and thermal Energies= -699.468201

Sum of electronic and thermal Enthalpies= -699.467257

Sum of electronic and thermal Free Energies= -699.525177

|    |   |   |           |           |           |
|----|---|---|-----------|-----------|-----------|
| 1  | 7 | 0 | -1.444319 | 1.339711  | 0.530934  |
| 2  | 6 | 0 | -1.987090 | 0.017048  | 0.425826  |
| 3  | 6 | 0 | -0.835398 | -0.990592 | 0.512885  |
| 4  | 6 | 0 | 0.259102  | -0.648132 | -0.480539 |
| 5  | 7 | 0 | 0.985702  | -1.501037 | -1.088670 |
| 6  | 1 | 0 | 2.729534  | -0.278426 | 1.114717  |
| 7  | 1 | 0 | 0.671165  | -2.441822 | -0.860300 |
| 8  | 7 | 0 | 0.493407  | 0.702430  | -0.614857 |
| 9  | 6 | 0 | -0.290062 | 1.739880  | -0.116135 |
| 10 | 8 | 0 | 0.040578  | 2.900239  | -0.227650 |

|    |   |   |           |           |           |
|----|---|---|-----------|-----------|-----------|
| 11 | 1 | 0 | -2.668135 | -0.136249 | 1.273355  |
| 12 | 8 | 0 | -1.313883 | -2.302549 | 0.233680  |
| 13 | 1 | 0 | -1.482206 | -2.752350 | 1.066423  |
| 14 | 8 | 0 | -2.687169 | -0.141713 | -0.797026 |
| 15 | 1 | 0 | -2.789029 | -1.093648 | -0.933410 |
| 16 | 1 | 0 | -2.079593 | 2.102200  | 0.713862  |
| 17 | 1 | 0 | 1.369873  | 0.983121  | -1.041155 |
| 18 | 8 | 0 | 2.195534  | -0.283289 | 1.928529  |
| 19 | 1 | 0 | 2.198572  | 0.638921  | 2.202495  |
| 20 | 1 | 0 | 2.702651  | -0.797611 | -1.074332 |
| 21 | 8 | 0 | 3.316260  | -0.114150 | -0.721343 |
| 22 | 1 | 0 | 4.171968  | -0.260740 | -1.132776 |
| 23 | 1 | 0 | -0.358196 | -0.928646 | 1.497532  |

**Cg-TS2(E=-699.617288667)**

|                                              |             |
|----------------------------------------------|-------------|
| Sum of electronic and zero-point Energies=   | -699.438790 |
| Sum of electronic and thermal Energies=      | -699.425892 |
| Sum of electronic and thermal Enthalpies=    | -699.424948 |
| Sum of electronic and thermal Free Energies= | -699.477135 |

|   |   |   |           |           |          |
|---|---|---|-----------|-----------|----------|
| 1 | 7 | 0 | -1.516341 | 1.266295  | 0.549485 |
| 2 | 6 | 0 | -1.959473 | -0.081589 | 0.338676 |
| 3 | 6 | 0 | -0.763060 | -1.018773 | 0.545642 |

|    |   |   |           |           |           |
|----|---|---|-----------|-----------|-----------|
| 4  | 6 | 0 | 0.424584  | -0.529112 | -0.258252 |
| 5  | 7 | 0 | 1.102663  | -1.377193 | -1.011329 |
| 6  | 1 | 0 | 2.716544  | -0.183924 | 0.497143  |
| 7  | 1 | 0 | 0.996187  | -2.348509 | -0.756665 |
| 8  | 7 | 0 | 0.537386  | 0.802268  | -0.477421 |
| 9  | 6 | 0 | -0.347764 | 1.770649  | 0.007757  |
| 10 | 8 | 0 | -0.091470 | 2.950200  | -0.045235 |
| 11 | 1 | 0 | -2.721096 | -0.310052 | 1.094833  |
| 12 | 8 | 0 | -1.104937 | -2.338247 | 0.134286  |
| 13 | 1 | 0 | -1.198426 | -2.888302 | 0.916970  |
| 14 | 8 | 0 | -2.496722 | -0.231826 | -0.963033 |
| 15 | 1 | 0 | -2.562483 | -1.181517 | -1.131710 |
| 16 | 1 | 0 | -2.217339 | 1.976076  | 0.704016  |
| 17 | 1 | 0 | 1.484925  | 1.110511  | -0.742500 |
| 18 | 8 | 0 | 1.928591  | -0.622849 | 1.419150  |
| 19 | 1 | 0 | 1.864029  | 0.098402  | 2.056315  |
| 20 | 1 | 0 | 2.049059  | -1.039041 | -1.258099 |
| 21 | 8 | 0 | 3.134570  | 0.201700  | -0.510838 |
| 22 | 1 | 0 | 4.071061  | 0.401927  | -0.466906 |
| 23 | 1 | 0 | -0.434393 | -0.994045 | 1.583873  |

**Cg-IM2(E=-699.667348222)**

Sum of electronic and zero-point Energies= -699.481605

Sum of electronic and thermal Energies= -699.468591

Sum of electronic and thermal Enthalpies= -699.467647

Sum of electronic and thermal Free Energies= -699.519910

|    |   |   |           |           |           |
|----|---|---|-----------|-----------|-----------|
| 1  | 7 | 0 | 1.497281  | 1.418547  | -0.239547 |
| 2  | 6 | 0 | 1.940659  | 0.058626  | -0.079457 |
| 3  | 6 | 0 | 0.926644  | -0.901853 | -0.728799 |
| 4  | 6 | 0 | -0.496609 | -0.580541 | -0.215734 |
| 5  | 7 | 0 | -0.595869 | -0.957577 | 1.181394  |
| 6  | 1 | 0 | -3.181702 | -0.663972 | -0.067675 |
| 7  | 1 | 0 | -0.543964 | -1.971098 | 1.243975  |
| 8  | 7 | 0 | -0.761144 | 0.827254  | -0.415591 |
| 9  | 6 | 0 | 0.176554  | 1.834404  | -0.223681 |
| 10 | 8 | 0 | -0.138762 | 3.001574  | -0.110748 |
| 11 | 1 | 0 | 2.906719  | -0.055703 | -0.574348 |
| 12 | 8 | 0 | 1.282877  | -2.237285 | -0.447766 |
| 13 | 1 | 0 | 1.807811  | -2.202521 | 0.365673  |
| 14 | 8 | 0 | 2.175693  | -0.331780 | 1.269025  |
| 15 | 1 | 0 | 1.297429  | -0.361450 | 1.696645  |
| 16 | 1 | 0 | 2.143600  | 2.153054  | 0.008762  |
| 17 | 1 | 0 | -1.708222 | 1.111639  | -0.182004 |
| 18 | 8 | 0 | -1.487906 | -1.324164 | -0.946255 |
| 19 | 1 | 0 | -1.412423 | -1.078311 | -1.877043 |

|    |   |   |           |           |           |
|----|---|---|-----------|-----------|-----------|
| 20 | 1 | 0 | -1.498217 | -0.658506 | 1.546147  |
| 21 | 8 | 0 | -3.412685 | 0.004365  | 0.595940  |
| 22 | 1 | 0 | -4.368198 | 0.104194  | 0.574192  |
| 23 | 1 | 0 | 0.938073  | -0.760395 | -1.813643 |

**Cg-TS3(E=-699.647238189)**

Sum of electronic and zero-point Energies= -699.464214

Sum of electronic and thermal Energies= -699.450682

Sum of electronic and thermal Enthalpies= -699.449737

Sum of electronic and thermal Free Energies= -699.503779

|    |   |   |           |           |           |
|----|---|---|-----------|-----------|-----------|
| 1  | 7 | 0 | 1.261726  | 1.585596  | -0.280194 |
| 2  | 6 | 0 | 1.922962  | 0.325674  | -0.242778 |
| 3  | 6 | 0 | 0.990189  | -0.789886 | -0.736750 |
| 4  | 6 | 0 | -0.400026 | -0.716485 | -0.045227 |
| 5  | 7 | 0 | -0.403122 | -1.168923 | 1.333878  |
| 6  | 1 | 0 | -3.196988 | -0.938926 | 0.099284  |
| 7  | 1 | 0 | 0.539045  | -1.292615 | 1.680933  |
| 8  | 7 | 0 | -0.885907 | 0.652031  | -0.194962 |
| 9  | 6 | 0 | -0.113954 | 1.791510  | -0.162454 |
| 10 | 8 | 0 | -0.574617 | 2.911703  | -0.076964 |
| 11 | 1 | 0 | 2.809971  | 0.343357  | -0.879481 |
| 12 | 8 | 0 | 1.605719  | -2.044514 | -0.584063 |



|    |   |   |           |           |           |
|----|---|---|-----------|-----------|-----------|
| 13 | 1 | 0 | 2.089676  | -2.018380 | 0.251551  |
| 14 | 8 | 0 | 2.421818  | -0.023231 | 1.072471  |
| 15 | 1 | 0 | 1.935907  | 0.510344  | 1.712291  |
| 16 | 1 | 0 | 1.803442  | 2.436271  | -0.270638 |
| 17 | 1 | 0 | -1.845774 | 0.789275  | 0.121157  |
| 18 | 8 | 0 | -1.334639 | -1.570734 | -0.704785 |
| 19 | 1 | 0 | -1.430878 | -1.245909 | -1.607818 |
| 20 | 1 | 0 | -0.880368 | -2.060399 | 1.393670  |
| 21 | 8 | 0 | -3.686924 | -0.155478 | 0.386773  |
| 22 | 1 | 0 | -4.303858 | 0.028604  | -0.328385 |
| 23 | 1 | 0 | 0.825069  | -0.639407 | -1.807818 |

**Cg-IM3 (E=-699.658816042)**

Sum of electronic and zero-point Energies= -699.473976

Sum of electronic and thermal Energies= -699.460581

Sum of electronic and thermal Enthalpies= -699.459637

Sum of electronic and thermal Free Energies= -699.512872

|   |   |   |           |           |           |
|---|---|---|-----------|-----------|-----------|
| 1 | 7 | 0 | 1.489723  | 1.414061  | -0.318067 |
| 2 | 6 | 0 | 1.925357  | 0.083893  | -0.045911 |
| 3 | 6 | 0 | 0.958392  | -0.916155 | -0.681811 |
| 4 | 6 | 0 | -0.520404 | -0.628174 | -0.266417 |
| 5 | 7 | 0 | -0.898287 | -1.177923 | 1.030703  |

|    |   |   |           |           |           |
|----|---|---|-----------|-----------|-----------|
| 6  | 1 | 0 | -2.766402 | -0.404757 | 1.089664  |
| 7  | 1 | 0 | -0.258071 | -0.834820 | 1.740739  |
| 8  | 7 | 0 | -0.767587 | 0.798285  | -0.290786 |
| 9  | 6 | 0 | 0.155092  | 1.817760  | -0.230049 |
| 10 | 8 | 0 | -0.147304 | 2.990109  | -0.151524 |
| 11 | 1 | 0 | 2.924824  | -0.056946 | -0.468306 |
| 12 | 8 | 0 | 1.331767  | -2.240262 | -0.377864 |
| 13 | 1 | 0 | 1.633875  | -2.230893 | 0.539640  |
| 14 | 8 | 0 | 1.960197  | -0.264870 | 1.357069  |
| 15 | 1 | 0 | 2.656365  | 0.238351  | 1.791137  |
| 16 | 1 | 0 | 2.136794  | 2.180644  | -0.209158 |
| 17 | 1 | 0 | -1.725237 | 1.054569  | -0.048280 |
| 18 | 8 | 0 | -1.401465 | -1.285407 | -1.163916 |
| 19 | 1 | 0 | -1.286885 | -0.881007 | -2.030926 |
| 20 | 1 | 0 | -0.821696 | -2.190253 | 0.987372  |
| 21 | 8 | 0 | -3.457131 | 0.159788  | 0.694519  |
| 22 | 1 | 0 | -3.689695 | -0.333471 | -0.099799 |
| 23 | 1 | 0 | 1.030047  | -0.801187 | -1.766183 |

**Cg-TS4 (E= -699.656880784)**

Sum of electronic and zero-point Energies= -699.472573

Sum of electronic and thermal Energies= -699.459698

Sum of electronic and thermal Enthalpies= -699.458754

Sum of electronic and thermal Free Energies= -699.511095

|    |   |   |           |           |           |
|----|---|---|-----------|-----------|-----------|
| 1  | 7 | 0 | 1.465169  | 1.439243  | -0.316904 |
| 2  | 6 | 0 | 1.923188  | 0.123750  | -0.004540 |
| 3  | 6 | 0 | 1.008052  | -0.905963 | -0.663044 |
| 4  | 6 | 0 | -0.493242 | -0.649482 | -0.315739 |
| 5  | 7 | 0 | -0.923338 | -1.244160 | 0.954107  |
| 6  | 1 | 0 | -2.726283 | -0.519101 | 1.031166  |
| 7  | 1 | 0 | -0.308925 | -0.930839 | 1.701940  |
| 8  | 7 | 0 | -0.775937 | 0.768174  | -0.294061 |
| 9  | 6 | 0 | 0.123442  | 1.811352  | -0.245223 |
| 10 | 8 | 0 | -0.213310 | 2.974965  | -0.175299 |
| 11 | 1 | 0 | 2.941894  | 0.003662  | -0.385001 |
| 12 | 8 | 0 | 1.399505  | -2.217953 | -0.324200 |
| 13 | 1 | 0 | 1.663318  | -2.189744 | 0.604471  |
| 14 | 8 | 0 | 1.907420  | -0.199195 | 1.404445  |
| 15 | 1 | 0 | 2.568084  | 0.332469  | 1.859462  |
| 16 | 1 | 0 | 2.093057  | 2.222052  | -0.210974 |
| 17 | 1 | 0 | -1.731514 | 1.006447  | -0.026764 |
| 18 | 8 | 0 | -1.262207 | -1.296063 | -1.321156 |
| 19 | 1 | 0 | -1.818025 | -0.622932 | -1.724842 |
| 20 | 1 | 0 | -0.841947 | -2.253880 | 0.873611  |
| 21 | 8 | 0 | -3.408828 | 0.128640  | 0.758151  |

|    |   |   |           |           |           |
|----|---|---|-----------|-----------|-----------|
| 22 | 1 | 0 | -4.049249 | -0.383386 | 0.255465  |
| 23 | 1 | 0 | 1.099044  | -0.808636 | -1.744778 |

**Cg-IM4 (E= -699.667833040)**

Sum of electronic and zero-point Energies= -699.482151

Sum of electronic and thermal Energies= -699.469254

Sum of electronic and thermal Enthalpies= -699.468310

Sum of electronic and thermal Free Energies= -699.520419

|    |   |   |           |           |           |
|----|---|---|-----------|-----------|-----------|
| 1  | 7 | 0 | 1.810023  | 1.046838  | -0.224895 |
| 2  | 6 | 0 | 1.900697  | -0.367174 | -0.057839 |
| 3  | 6 | 0 | 0.690106  | -1.022138 | -0.718940 |
| 4  | 6 | 0 | -0.634921 | -0.397784 | -0.238029 |
| 5  | 7 | 0 | -1.009827 | -0.720904 | 1.153304  |
| 6  | 1 | 0 | -2.762558 | 0.100417  | 1.105072  |
| 7  | 1 | 0 | -0.283151 | -0.378696 | 1.778324  |
| 8  | 7 | 0 | -0.527827 | 1.039463  | -0.379467 |
| 9  | 6 | 0 | 0.626737  | 1.779178  | -0.216813 |
| 10 | 8 | 0 | 0.625317  | 2.990445  | -0.124527 |
| 11 | 1 | 0 | 2.810206  | -0.727187 | -0.552420 |
| 12 | 8 | 0 | 0.738105  | -2.407656 | -0.414228 |
| 13 | 1 | 0 | 0.003068  | -2.821707 | -0.881618 |
| 14 | 8 | 0 | 1.974852  | -0.694321 | 1.336888  |

|    |   |   |           |           |           |
|----|---|---|-----------|-----------|-----------|
| 15 | 1 | 0 | 1.975028  | -1.659543 | 1.388213  |
| 16 | 1 | 0 | 2.616678  | 1.604525  | 0.011297  |
| 17 | 1 | 0 | -1.383088 | 1.566499  | -0.252509 |
| 18 | 8 | 0 | -1.615016 | -0.943110 | -1.082343 |
| 19 | 1 | 0 | -2.475195 | -0.584426 | -0.791338 |
| 20 | 1 | 0 | -1.020408 | -1.733552 | 1.249729  |
| 21 | 8 | 0 | -3.393322 | 0.493068  | 0.463425  |
| 22 | 1 | 0 | -4.269164 | 0.466364  | 0.857394  |
| 23 | 1 | 0 | 0.746796  | -0.850372 | -1.798744 |

**Cg-TS5 (E= -699.638854332)**

Sum of electronic and zero-point Energies= -699.459355

Sum of electronic and thermal Energies= -699.447585

Sum of electronic and thermal Enthalpies= -699.446641

Sum of electronic and thermal Free Energies= -699.496912

|   |   |   |           |           |           |
|---|---|---|-----------|-----------|-----------|
| 1 | 7 | 0 | 2.077628  | 0.377043  | -0.092665 |
| 2 | 6 | 0 | 1.628185  | -0.976363 | -0.059199 |
| 3 | 6 | 0 | 0.297311  | -1.073771 | -0.803447 |
| 4 | 6 | 0 | -0.716160 | -0.015496 | -0.344398 |
| 5 | 7 | 0 | -1.153244 | -0.310533 | 1.135997  |
| 6 | 1 | 0 | -2.148115 | 0.318674  | 1.183599  |
| 7 | 1 | 0 | -0.411870 | -0.095758 | 1.798875  |
| 8 | 7 | 0 | -0.067475 | 1.276369  | -0.341700 |

|    |   |   |           |           |           |
|----|---|---|-----------|-----------|-----------|
| 9  | 6 | 0 | 1.277022  | 1.514614  | -0.142068 |
| 10 | 8 | 0 | 1.746962  | 2.630162  | -0.048894 |
| 11 | 1 | 0 | 2.367061  | -1.611692 | -0.560674 |
| 12 | 8 | 0 | -0.233991 | -2.373550 | -0.601732 |
| 13 | 1 | 0 | -1.074552 | -2.385399 | -1.080077 |
| 14 | 8 | 0 | 1.499222  | -1.412582 | 1.303591  |
| 15 | 1 | 0 | 1.217584  | -2.336243 | 1.268793  |
| 16 | 1 | 0 | 3.033918  | 0.574414  | 0.158317  |
| 17 | 1 | 0 | -0.658350 | 2.093973  | -0.397919 |
| 18 | 8 | 0 | -1.834807 | -0.082013 | -1.084438 |
| 19 | 1 | 0 | -2.650019 | 0.487746  | -0.432080 |
| 20 | 1 | 0 | -1.353181 | -1.307162 | 1.200174  |
| 21 | 8 | 0 | -3.135716 | 1.022742  | 0.576934  |
| 22 | 1 | 0 | -4.045812 | 0.765398  | 0.746620  |
| 23 | 1 | 0 | 0.473461  | -0.876078 | -1.866061 |

**Cg-PC (E= -699.693286398)**

|                                              |             |
|----------------------------------------------|-------------|
| Sum of electronic and zero-point Energies=   | -699.510596 |
| Sum of electronic and thermal Energies=      | -699.496043 |
| Sum of electronic and thermal Enthalpies=    | -699.495098 |
| Sum of electronic and thermal Free Energies= | -699.551627 |

|   |   |   |          |          |           |
|---|---|---|----------|----------|-----------|
| 1 | 7 | 0 | 1.536502 | 1.377675 | -0.080803 |
|---|---|---|----------|----------|-----------|

|    |   |   |           |           |           |
|----|---|---|-----------|-----------|-----------|
| 2  | 6 | 0 | 1.864847  | 0.000346  | 0.322686  |
| 3  | 6 | 0 | 1.256115  | -0.907123 | -0.768066 |
| 4  | 6 | 0 | -0.228034 | -0.608537 | -0.904641 |
| 5  | 7 | 0 | -1.263917 | -0.361894 | 2.281543  |
| 6  | 1 | 0 | -2.029975 | -0.280695 | 1.611456  |
| 7  | 1 | 0 | -1.374113 | 0.392022  | 2.953930  |
| 8  | 7 | 0 | -0.572202 | 0.706764  | -0.848099 |
| 9  | 6 | 0 | 0.275044  | 1.769511  | -0.439453 |
| 10 | 8 | 0 | -0.133251 | 2.908374  | -0.434198 |
| 11 | 1 | 0 | 2.950847  | -0.095240 | 0.279007  |
| 12 | 8 | 0 | 1.470134  | -2.261852 | -0.504283 |
| 13 | 1 | 0 | 0.617794  | -2.700789 | -0.641345 |
| 14 | 8 | 0 | 1.497685  | -0.313357 | 1.622156  |
| 15 | 1 | 0 | 0.515445  | -0.330974 | 1.738807  |
| 16 | 1 | 0 | 2.065068  | 2.120954  | 0.353884  |
| 17 | 1 | 0 | -1.564505 | 0.932565  | -0.883689 |
| 18 | 8 | 0 | -1.039121 | -1.518417 | -1.053838 |
| 19 | 1 | 0 | -2.757357 | -0.882158 | -0.588174 |
| 20 | 1 | 0 | -1.398890 | -1.230993 | 2.790426  |
| 21 | 8 | 0 | -3.232518 | -0.146767 | -0.159496 |
| 22 | 1 | 0 | -4.161531 | -0.239818 | -0.387381 |
| 23 | 1 | 0 | 1.723274  | -0.611707 | -1.721289 |

### III.2 At the Mp2/6-311g(d,p) Level

#### Cg-RC(EUMP2=-0.69787680382396D+03)

|                                              |             |
|----------------------------------------------|-------------|
| Sum of electronic and zero-point Energies=   | -697.692008 |
| Sum of electronic and thermal Energies=      | -697.677496 |
| Sum of electronic and thermal Enthalpies=    | -697.676552 |
| Sum of electronic and thermal Free Energies= | -697.733404 |

|    |   |   |           |           |           |
|----|---|---|-----------|-----------|-----------|
| 1  | 7 | 0 | 1.669895  | 1.429724  | -0.401494 |
| 2  | 6 | 0 | 2.230847  | 0.219522  | 0.105546  |
| 3  | 6 | 0 | 1.479785  | -0.920406 | -0.565440 |
| 4  | 6 | 0 | -0.005478 | -0.696147 | -0.343686 |
| 5  | 7 | 0 | -0.751757 | -1.796008 | -0.252456 |
| 6  | 1 | 0 | -1.768188 | -1.726104 | -0.104044 |
| 7  | 1 | 0 | -0.271090 | -2.675395 | -0.151874 |
| 8  | 7 | 0 | -0.538090 | 0.495203  | -0.306607 |
| 9  | 6 | 0 | 0.281366  | 1.627814  | -0.367938 |
| 10 | 8 | 0 | -0.189347 | 2.747412  | -0.417195 |
| 11 | 1 | 0 | 3.293585  | 0.182670  | -0.174363 |
| 12 | 8 | 0 | 1.846249  | -2.178098 | -0.006209 |
| 13 | 1 | 0 | 2.628326  | -2.481824 | -0.474933 |
| 14 | 8 | 0 | 2.088930  | 0.133999  | 1.510012  |
| 15 | 1 | 0 | 2.212132  | -0.798291 | 1.725925  |



|    |   |   |           |           |           |
|----|---|---|-----------|-----------|-----------|
| 16 | 1 | 0 | 2.174209  | 2.281979  | -0.194226 |
| 17 | 1 | 0 | -2.196539 | 1.012946  | 0.347044  |
| 18 | 8 | 0 | -3.113810 | 1.125439  | 0.666340  |
| 19 | 1 | 0 | -3.396348 | 1.931531  | 0.231694  |
| 20 | 8 | 0 | -3.546716 | -1.470239 | 0.071817  |
| 21 | 1 | 0 | -4.026426 | -1.460444 | -0.758131 |
| 22 | 1 | 0 | -3.578641 | -0.533902 | 0.354242  |
| 23 | 1 | 0 | 1.667076  | -0.888399 | -1.646456 |

**Cg-TS1(EUMP2=-0.69785014243762D+03)**

|                                              |             |
|----------------------------------------------|-------------|
| Sum of electronic and zero-point Energies=   | -697.672941 |
| Sum of electronic and thermal Energies=      | -697.660519 |
| Sum of electronic and thermal Enthalpies=    | -697.659575 |
| Sum of electronic and thermal Free Energies= | -697.711797 |

|   |   |   |           |           |           |
|---|---|---|-----------|-----------|-----------|
| 1 | 7 | 0 | 1.687434  | 1.380390  | -0.394786 |
| 2 | 6 | 0 | 2.183696  | 0.125986  | 0.069703  |
| 3 | 6 | 0 | 1.349777  | -0.953961 | -0.602358 |
| 4 | 6 | 0 | -0.118407 | -0.692079 | -0.304860 |
| 5 | 7 | 0 | -0.934012 | -1.701136 | -0.146138 |
| 6 | 1 | 0 | -2.266711 | -1.545648 | -0.001195 |
| 7 | 1 | 0 | -0.434174 | -2.583890 | -0.174521 |
| 8 | 7 | 0 | -0.551031 | 0.575479  | -0.260805 |

|    |   |   |           |           |           |
|----|---|---|-----------|-----------|-----------|
| 9  | 6 | 0 | 0.314505  | 1.658028  | -0.309222 |
| 10 | 8 | 0 | -0.093286 | 2.806327  | -0.308897 |
| 11 | 1 | 0 | 3.234826  | 0.031827  | -0.240241 |
| 12 | 8 | 0 | 1.692051  | -2.243529 | -0.106288 |
| 13 | 1 | 0 | 2.446956  | -2.551254 | -0.615129 |
| 14 | 8 | 0 | 2.076015  | 0.013524  | 1.476265  |
| 15 | 1 | 0 | 2.131199  | -0.931815 | 1.662124  |
| 16 | 1 | 0 | 2.243224  | 2.195258  | -0.169976 |
| 17 | 1 | 0 | -1.826518 | 0.897201  | 0.192887  |
| 18 | 8 | 0 | -2.867106 | 1.009878  | 0.563659  |
| 19 | 1 | 0 | -3.270664 | 1.714996  | 0.051124  |
| 20 | 8 | 0 | -3.368305 | -1.266257 | 0.110810  |
| 21 | 1 | 0 | -3.791607 | -1.420454 | -0.737510 |
| 22 | 1 | 0 | -3.266914 | -0.088898 | 0.329591  |
| 23 | 1 | 0 | 1.491275  | -0.887836 | -1.689011 |

**Cg-IM1 (EUMP2 =-0.69787667626477D+03)**

|                                              |             |
|----------------------------------------------|-------------|
| Sum of electronic and zero-point Energies=   | -697.691995 |
| Sum of electronic and thermal Energies=      | -697.677132 |
| Sum of electronic and thermal Enthalpies=    | -697.676188 |
| Sum of electronic and thermal Free Energies= | -697.733704 |

|   |   |   |           |          |          |
|---|---|---|-----------|----------|----------|
| 1 | 7 | 0 | -1.352794 | 1.370450 | 0.547776 |
|---|---|---|-----------|----------|----------|

|    |   |   |           |           |           |
|----|---|---|-----------|-----------|-----------|
| 2  | 6 | 0 | -1.958022 | 0.083217  | 0.395271  |
| 3  | 6 | 0 | -0.865975 | -0.967577 | 0.542040  |
| 4  | 6 | 0 | 0.238108  | -0.698760 | -0.454531 |
| 5  | 7 | 0 | 0.933921  | -1.599859 | -1.045939 |
| 6  | 1 | 0 | 2.592217  | -0.234545 | 1.150501  |
| 7  | 1 | 0 | 0.567295  | -2.508101 | -0.761421 |
| 8  | 7 | 0 | 0.514306  | 0.636807  | -0.647192 |
| 9  | 6 | 0 | -0.206026 | 1.717942  | -0.151042 |
| 10 | 8 | 0 | 0.167678  | 2.863866  | -0.296904 |
| 11 | 1 | 0 | -2.696688 | -0.040894 | 1.198938  |
| 12 | 8 | 0 | -1.391985 | -2.262802 | 0.285046  |
| 13 | 1 | 0 | -1.608203 | -2.654897 | 1.134437  |
| 14 | 8 | 0 | -2.576937 | -0.036748 | -0.870342 |
| 15 | 1 | 0 | -2.721188 | -0.983431 | -0.992534 |
| 16 | 1 | 0 | -1.969834 | 2.159740  | 0.681343  |
| 17 | 1 | 0 | 1.389114  | 0.870719  | -1.103558 |
| 18 | 8 | 0 | 2.030560  | -0.174540 | 1.936655  |
| 19 | 1 | 0 | 1.957732  | 0.774660  | 2.053230  |
| 20 | 1 | 0 | 2.680324  | -0.920425 | -0.997606 |
| 21 | 8 | 0 | 3.288770  | -0.235070 | -0.661669 |
| 22 | 1 | 0 | 4.149574  | -0.469749 | -1.010441 |
| 23 | 1 | 0 | -0.401580 | -0.891430 | 1.531884  |

**Cg-TS2 (EUMP2=-0.69781948176975D+03)**

|                                              |             |
|----------------------------------------------|-------------|
| Sum of electronic and zero-point Energies=   | -697.638285 |
| Sum of electronic and thermal Energies=      | -697.625512 |
| Sum of electronic and thermal Enthalpies=    | -697.624568 |
| Sum of electronic and thermal Free Energies= | -697.676876 |

|    |   |   |           |           |           |
|----|---|---|-----------|-----------|-----------|
| 1  | 7 | 0 | -1.553514 | 1.205306  | 0.577821  |
| 2  | 6 | 0 | -1.942629 | -0.143164 | 0.292933  |
| 3  | 6 | 0 | -0.736943 | -1.032309 | 0.568336  |
| 4  | 6 | 0 | 0.441193  | -0.513224 | -0.222728 |
| 5  | 7 | 0 | 1.116316  | -1.337628 | -1.005430 |
| 6  | 1 | 0 | 2.652283  | -0.136650 | 0.497858  |
| 7  | 1 | 0 | 1.045524  | -2.308013 | -0.732750 |
| 8  | 7 | 0 | 0.510212  | 0.819069  | -0.450710 |
| 9  | 6 | 0 | -0.404955 | 1.760011  | 0.031603  |
| 10 | 8 | 0 | -0.191796 | 2.950289  | -0.024828 |
| 11 | 1 | 0 | -2.752212 | -0.416647 | 0.982187  |
| 12 | 8 | 0 | -1.017436 | -2.366499 | 0.173849  |
| 13 | 1 | 0 | -1.071010 | -2.894913 | 0.973249  |
| 14 | 8 | 0 | -2.360999 | -0.274361 | -1.049117 |
| 15 | 1 | 0 | -2.387070 | -1.223821 | -1.220716 |
| 16 | 1 | 0 | -2.291517 | 1.887452  | 0.686705  |

|    |   |   |           |           |           |
|----|---|---|-----------|-----------|-----------|
| 17 | 1 | 0 | 1.445865  | 1.149149  | -0.729326 |
| 18 | 8 | 0 | 1.902426  | -0.575341 | 1.392478  |
| 19 | 1 | 0 | 1.798801  | 0.181257  | 1.979628  |
| 20 | 1 | 0 | 2.052812  | -0.959250 | -1.244744 |
| 21 | 8 | 0 | 3.079259  | 0.266199  | -0.521228 |
| 22 | 1 | 0 | 4.016292  | 0.447052  | -0.452154 |
| 23 | 1 | 0 | -0.452495 | -0.963020 | 1.618210  |

**Cg-IM2 (EUMP2=-0.69788552967445D+03)**

|                                              |             |
|----------------------------------------------|-------------|
| Sum of electronic and zero-point Energies=   | -697.696610 |
| Sum of electronic and thermal Energies=      | -697.683726 |
| Sum of electronic and thermal Enthalpies=    | -697.682782 |
| Sum of electronic and thermal Free Energies= | -697.734828 |

|   |   |   |           |           |           |
|---|---|---|-----------|-----------|-----------|
| 1 | 7 | 0 | 1.493257  | 1.410421  | -0.274380 |
| 2 | 6 | 0 | 1.931505  | 0.056166  | -0.077030 |
| 3 | 6 | 0 | 0.926569  | -0.905308 | -0.720900 |
| 4 | 6 | 0 | -0.487719 | -0.580806 | -0.226056 |
| 5 | 7 | 0 | -0.577633 | -0.907327 | 1.182235  |
| 6 | 1 | 0 | -3.159420 | -0.676773 | -0.043596 |
| 7 | 1 | 0 | -0.544508 | -1.921275 | 1.266673  |
| 8 | 7 | 0 | -0.759520 | 0.811747  | -0.474786 |
| 9 | 6 | 0 | 0.169805  | 1.822249  | -0.235267 |

|    |   |   |           |           |           |
|----|---|---|-----------|-----------|-----------|
| 10 | 8 | 0 | -0.154875 | 2.985056  | -0.090361 |
| 11 | 1 | 0 | 2.903149  | -0.071359 | -0.561263 |
| 12 | 8 | 0 | 1.273796  | -2.235744 | -0.414453 |
| 13 | 1 | 0 | 1.783763  | -2.168037 | 0.403892  |
| 14 | 8 | 0 | 2.145404  | -0.304588 | 1.276357  |
| 15 | 1 | 0 | 1.250293  | -0.330086 | 1.664581  |
| 16 | 1 | 0 | 2.126975  | 2.138180  | 0.026814  |
| 17 | 1 | 0 | -1.703516 | 1.091378  | -0.220752 |
| 18 | 8 | 0 | -1.465613 | -1.352560 | -0.924776 |
| 19 | 1 | 0 | -1.377979 | -1.113086 | -1.855101 |
| 20 | 1 | 0 | -1.480881 | -0.591836 | 1.531648  |
| 21 | 8 | 0 | -3.390262 | 0.006880  | 0.597401  |
| 22 | 1 | 0 | -4.345906 | 0.067898  | 0.566406  |
| 23 | 1 | 0 | 0.946729  | -0.775047 | -1.808606 |

**Cg-TS3 ( EUMP2=-0.69786361405175D+03 )**

Sum of electronic and zero-point Energies= -697.677264

Sum of electronic and thermal Energies= -697.663892

Sum of electronic and thermal Enthalpies= -697.662947

Sum of electronic and thermal Free Energies= -697.716819

|   |   |   |          |          |           |
|---|---|---|----------|----------|-----------|
| 1 | 7 | 0 | 1.317809 | 1.543092 | -0.330814 |
| 2 | 6 | 0 | 1.924247 | 0.265031 | -0.194278 |

|    |   |   |           |           |           |
|----|---|---|-----------|-----------|-----------|
| 3  | 6 | 0 | 0.984509  | -0.815883 | -0.724088 |
| 4  | 6 | 0 | -0.412384 | -0.697533 | -0.086734 |
| 5  | 7 | 0 | -0.475960 | -1.123503 | 1.297995  |
| 6  | 1 | 0 | -3.159851 | -0.877510 | 0.120509  |
| 7  | 1 | 0 | 0.454203  | -1.279192 | 1.664189  |
| 8  | 7 | 0 | -0.854912 | 0.672856  | -0.272635 |
| 9  | 6 | 0 | -0.048900 | 1.792589  | -0.192442 |
| 10 | 8 | 0 | -0.480287 | 2.923304  | -0.075043 |
| 11 | 1 | 0 | 2.854812  | 0.224446  | -0.766346 |
| 12 | 8 | 0 | 1.552368  | -2.088419 | -0.543777 |
| 13 | 1 | 0 | 1.981083  | -2.057916 | 0.318953  |
| 14 | 8 | 0 | 2.307572  | -0.052237 | 1.157407  |
| 15 | 1 | 0 | 1.733514  | 0.475271  | 1.723661  |
| 16 | 1 | 0 | 1.889213  | 2.369204  | -0.227401 |
| 17 | 1 | 0 | -1.799815 | 0.837654  | 0.073620  |
| 18 | 8 | 0 | -1.342757 | -1.535263 | -0.759205 |
| 19 | 1 | 0 | -1.416671 | -1.176806 | -1.650622 |
| 20 | 1 | 0 | -0.970225 | -2.007808 | 1.339975  |
| 21 | 8 | 0 | -3.626641 | -0.097622 | 0.439581  |
| 22 | 1 | 0 | -4.305228 | 0.041158  | -0.223566 |
| 23 | 1 | 0 | 0.863530  | -0.658949 | -1.801248 |

**Cg-IM3 ( EUMP2=-0.69787702144614D+03 )**

|                                              |             |
|----------------------------------------------|-------------|
| Sum of electronic and zero-point Energies=   | -697.688584 |
| Sum of electronic and thermal Energies=      | -697.675505 |
| Sum of electronic and thermal Enthalpies=    | -697.674561 |
| Sum of electronic and thermal Free Energies= | -697.726961 |

|    |   |   |           |           |           |
|----|---|---|-----------|-----------|-----------|
| 1  | 7 | 0 | 1.569652  | 1.326499  | -0.378795 |
| 2  | 6 | 0 | 1.911213  | -0.015273 | -0.042707 |
| 3  | 6 | 0 | 0.901877  | -0.961590 | -0.675163 |
| 4  | 6 | 0 | -0.544228 | -0.599236 | -0.256649 |
| 5  | 7 | 0 | -0.942584 | -1.112493 | 1.042858  |
| 6  | 1 | 0 | -2.767787 | -0.271955 | 1.074287  |
| 7  | 1 | 0 | -0.272550 | -0.791682 | 1.735952  |
| 8  | 7 | 0 | -0.712022 | 0.831233  | -0.296621 |
| 9  | 6 | 0 | 0.262079  | 1.804298  | -0.230437 |
| 10 | 8 | 0 | 0.020619  | 2.989897  | -0.119013 |
| 11 | 1 | 0 | 2.909139  | -0.238389 | -0.436345 |
| 12 | 8 | 0 | 1.206106  | -2.300570 | -0.365792 |
| 13 | 1 | 0 | 1.480168  | -2.282025 | 0.558327  |
| 14 | 8 | 0 | 1.879143  | -0.313845 | 1.362401  |
| 15 | 1 | 0 | 2.616240  | 0.143950  | 1.776250  |
| 16 | 1 | 0 | 2.254863  | 2.050696  | -0.212438 |
| 17 | 1 | 0 | -1.649252 | 1.139779  | -0.040375 |



|    |   |   |           |           |           |
|----|---|---|-----------|-----------|-----------|
| 18 | 8 | 0 | -1.461395 | -1.217032 | -1.138786 |
| 19 | 1 | 0 | -1.301868 | -0.824293 | -2.003173 |
| 20 | 1 | 0 | -0.903079 | -2.128048 | 1.004354  |
| 21 | 8 | 0 | -3.436511 | 0.289453  | 0.650011  |
| 22 | 1 | 0 | -3.600770 | -0.217688 | -0.148955 |
| 23 | 1 | 0 | 0.980226  | -0.849438 | -1.760811 |

**Cg-TS4 ( EUMP2=-0.69787435285809D+03 )**

Sum of electronic and zero-point Energies= -697.686664

Sum of electronic and thermal Energies= -697.674001

Sum of electronic and thermal Enthalpies= -697.673057

Sum of electronic and thermal Free Energies= -697.724905

|    |   |   |           |           |           |
|----|---|---|-----------|-----------|-----------|
| 1  | 7 | 0 | 1.569190  | 1.328734  | -0.378809 |
| 2  | 6 | 0 | 1.912176  | -0.007146 | -0.015183 |
| 3  | 6 | 0 | 0.928271  | -0.964381 | -0.665319 |
| 4  | 6 | 0 | -0.531133 | -0.607600 | -0.293366 |
| 5  | 7 | 0 | -0.974015 | -1.155840 | 0.985627  |
| 6  | 1 | 0 | -2.726766 | -0.356322 | 1.000321  |
| 7  | 1 | 0 | -0.320050 | -0.866774 | 1.709445  |
| 8  | 7 | 0 | -0.708038 | 0.820209  | -0.278658 |
| 9  | 6 | 0 | 0.261974  | 1.800551  | -0.236641 |
| 10 | 8 | 0 | 0.007907  | 2.984322  | -0.132264 |

|    |   |   |           |           |           |
|----|---|---|-----------|-----------|-----------|
| 11 | 1 | 0 | 2.922607  | -0.225194 | -0.378271 |
| 12 | 8 | 0 | 1.229540  | -2.300059 | -0.332645 |
| 13 | 1 | 0 | 1.475616  | -2.271395 | 0.598942  |
| 14 | 8 | 0 | 1.840301  | -0.285367 | 1.392266  |
| 15 | 1 | 0 | 2.558160  | 0.187545  | 1.822455  |
| 16 | 1 | 0 | 2.251124  | 2.058472  | -0.223973 |
| 17 | 1 | 0 | -1.638697 | 1.127170  | 0.001063  |
| 18 | 8 | 0 | -1.362019 | -1.207847 | -1.272603 |
| 19 | 1 | 0 | -1.866832 | -0.486287 | -1.656452 |
| 20 | 1 | 0 | -0.940642 | -2.169929 | 0.913017  |
| 21 | 8 | 0 | -3.387225 | 0.289134  | 0.688348  |
| 22 | 1 | 0 | -3.995391 | -0.253060 | 0.183245  |
| 23 | 1 | 0 | 1.015149  | -0.865942 | -1.748672 |

**Cg-IM4 ( EUMP2=-0.69788552353098D+03 )**

|                                              |             |
|----------------------------------------------|-------------|
| Sum of electronic and zero-point Energies=   | -697.696446 |
| Sum of electronic and thermal Energies=      | -697.683781 |
| Sum of electronic and thermal Enthalpies=    | -697.682837 |
| Sum of electronic and thermal Free Energies= | -697.734437 |

|   |   |   |          |           |           |
|---|---|---|----------|-----------|-----------|
| 1 | 7 | 0 | 1.783016 | 1.065503  | -0.261957 |
| 2 | 6 | 0 | 1.895204 | -0.340206 | -0.060718 |
| 3 | 6 | 0 | 0.702257 | -1.019354 | -0.711798 |

|    |   |   |           |           |           |
|----|---|---|-----------|-----------|-----------|
| 4  | 6 | 0 | -0.621602 | -0.416213 | -0.238132 |
| 5  | 7 | 0 | -0.973585 | -0.699097 | 1.160268  |
| 6  | 1 | 0 | -2.718846 | 0.099850  | 1.092586  |
| 7  | 1 | 0 | -0.238957 | -0.322113 | 1.755779  |
| 8  | 7 | 0 | -0.551532 | 1.009723  | -0.432937 |
| 9  | 6 | 0 | 0.584073  | 1.774746  | -0.229707 |
| 10 | 8 | 0 | 0.554318  | 2.984899  | -0.109026 |
| 11 | 1 | 0 | 2.813025  | -0.696108 | -0.545701 |
| 12 | 8 | 0 | 0.769426  | -2.394988 | -0.381866 |
| 13 | 1 | 0 | 0.016959  | -2.800406 | -0.826759 |
| 14 | 8 | 0 | 1.961195  | -0.633429 | 1.334616  |
| 15 | 1 | 0 | 1.956236  | -1.597487 | 1.385584  |
| 16 | 1 | 0 | 2.569458  | 1.635393  | 0.015473  |
| 17 | 1 | 0 | -1.414322 | 1.517183  | -0.270974 |
| 18 | 8 | 0 | -1.593123 | -1.015665 | -1.050527 |
| 19 | 1 | 0 | -2.445010 | -0.649185 | -0.756343 |
| 20 | 1 | 0 | -0.946396 | -1.709327 | 1.283340  |
| 21 | 8 | 0 | -3.354781 | 0.472117  | 0.452027  |
| 22 | 1 | 0 | -4.209388 | 0.449237  | 0.884467  |
| 23 | 1 | 0 | 0.756068  | -0.857250 | -1.794740 |

**Cg-TS5 ( EUMP2=-0.69785300729586D+03 )**

Sum of electronic and zero-point Energies= -697.669866

Sum of electronic and thermal Energies= -697.658396

Sum of electronic and thermal Enthalpies= -697.657451

Sum of electronic and thermal Free Energies= -697.707018

|    |   |   |           |           |           |
|----|---|---|-----------|-----------|-----------|
| 1  | 7 | 0 | 2.005690  | 0.522550  | -0.143465 |
| 2  | 6 | 0 | 1.681401  | -0.861925 | -0.065592 |
| 3  | 6 | 0 | 0.363409  | -1.093619 | -0.786878 |
| 4  | 6 | 0 | -0.718839 | -0.117736 | -0.343303 |
| 5  | 7 | 0 | -1.059727 | -0.343190 | 1.150983  |
| 6  | 1 | 0 | -2.040235 | 0.279410  | 1.205608  |
| 7  | 1 | 0 | -0.286326 | -0.091005 | 1.764208  |
| 8  | 7 | 0 | -0.202127 | 1.220174  | -0.458916 |
| 9  | 6 | 0 | 1.103797  | 1.584957  | -0.187427 |
| 10 | 8 | 0 | 1.465286  | 2.738732  | -0.057554 |
| 11 | 1 | 0 | 2.471628  | -1.443132 | -0.557109 |
| 12 | 8 | 0 | -0.059658 | -2.418557 | -0.527255 |
| 13 | 1 | 0 | -0.925409 | -2.470508 | -0.954548 |
| 14 | 8 | 0 | 1.597654  | -1.264136 | 1.304711  |
| 15 | 1 | 0 | 1.354137  | -2.197891 | 1.275310  |
| 16 | 1 | 0 | 2.928283  | 0.808268  | 0.150010  |
| 17 | 1 | 0 | -0.880409 | 1.971227  | -0.416072 |
| 18 | 8 | 0 | -1.859340 | -0.340899 | -1.017996 |
| 19 | 1 | 0 | -2.633064 | 0.308735  | -0.375676 |

|    |   |   |           |           |           |
|----|---|---|-----------|-----------|-----------|
| 20 | 1 | 0 | -1.248000 | -1.337448 | 1.272267  |
| 21 | 8 | 0 | -3.029241 | 0.962398  | 0.570563  |
| 22 | 1 | 0 | -3.952147 | 0.797689  | 0.773658  |
| 23 | 1 | 0 | 0.508471  | -0.912451 | -1.858418 |

**Cg-PC (EUMP2 =-0.69789955147849D+03)**

Sum of electronic and zero-point Energies= -697.713909

Sum of electronic and thermal Energies= -697.699325

Sum of electronic and thermal Enthalpies= -697.698381

Sum of electronic and thermal Free Energies= -697.755442

|    |   |   |           |           |           |
|----|---|---|-----------|-----------|-----------|
| 1  | 7 | 0 | 1.690189  | 1.265774  | -0.087772 |
| 2  | 6 | 0 | 1.882434  | -0.152045 | 0.228712  |
| 3  | 6 | 0 | 1.128408  | -0.916362 | -0.861055 |
| 4  | 6 | 0 | -0.323695 | -0.475520 | -0.876352 |
| 5  | 7 | 0 | -1.200752 | -0.786529 | 2.096114  |
| 6  | 1 | 0 | -1.974316 | -0.407689 | 1.553057  |
| 7  | 1 | 0 | -1.283906 | -0.390537 | 3.027720  |
| 8  | 7 | 0 | -0.535888 | 0.853224  | -0.670246 |
| 9  | 6 | 0 | 0.433959  | 1.796998  | -0.250911 |
| 10 | 8 | 0 | 0.131959  | 2.960782  | -0.096058 |
| 11 | 1 | 0 | 2.950786  | -0.356889 | 0.125394  |
| 12 | 8 | 0 | 1.217898  | -2.298244 | -0.671101 |

|    |   |   |           |           |           |
|----|---|---|-----------|-----------|-----------|
| 13 | 1 | 0 | 0.341727  | -2.630980 | -0.905729 |
| 14 | 8 | 0 | 1.533689  | -0.500710 | 1.523864  |
| 15 | 1 | 0 | 0.555611  | -0.561502 | 1.611332  |
| 16 | 1 | 0 | 2.305962  | 1.911457  | 0.389699  |
| 17 | 1 | 0 | -1.502255 | 1.172407  | -0.630072 |
| 18 | 8 | 0 | -1.221630 | -1.290832 | -1.086196 |
| 19 | 1 | 0 | -2.896328 | -0.483543 | -0.597800 |
| 20 | 1 | 0 | -1.377099 | -1.782071 | 2.191758  |
| 21 | 8 | 0 | -3.272206 | 0.254413  | -0.095269 |
| 22 | 1 | 0 | -4.195927 | 0.288257  | -0.347866 |
| 23 | 1 | 0 | 1.556576  | -0.607894 | -1.828444 |
